1 **Title:** Parent and offspring genotypes influence gene expression in early life

2

3 **Running Title:** Parental effects on offspring gene expression

4

5 **Authors & Affiliations:**

6 Daniel J. Newhouse<sup>1\*</sup>, Margarida Barcelo-Serra<sup>2</sup>, Elaina M. Tuttle<sup>2</sup>, Rusty A. Gonser<sup>2</sup>,

7 Christopher N. Balakrishnan<sup>1</sup>

8

9 <sup>1</sup>East Carolina University, <sup>2</sup>Indiana State University

10 <sup>\*</sup>Corresponding Author

## 11 **Abstract**

12 Parents can have profound effects on offspring fitness. Little, however, is known about the  
13 mechanisms through which parental care variation influences offspring physiology in natural  
14 systems. White-throated sparrows *Zonotrichia albicollis* (WTSPs) exist in two genetic morphs,  
15 tan and white, controlled by a large polymorphic supergene. Morphs mate disassortatively,  
16 resulting in two pair types: tan male x white female (TxW) pairs, which provide biparental care  
17 and white male x tan female (WxT) pairs, which provide female-biased care. To investigate the  
18 effects of parental care variation, we performed RNA-seq on WTSP nestlings sampled from nests  
19 of both pair types. Pair type had the largest effect on nestling gene expression, with 881 genes  
20 differentially expressed (DE) and seven correlated gene co-expression modules. The DE genes  
21 and modules up-regulated in nests with female-biased parental care primarily function in  
22 metabolism and stress-related pathways resulting from the overrepresentation of stress response  
23 and proteolysis genes. These results show that parental genotypes, a proxy for parental care in  
24 this system, alter nestling physiology and highlight avenues of further research investigating the  
25 ultimate implications of alternative parental care strategies. Nestlings also exhibited morph-  
26 specific gene expression, driven by innate immunity genes and co-expression of genes located in  
27 the supergene. Remarkably, we identified the same regulatory hub genes in these blood-derived  
28 expression networks as were previously identified in WTSP brains (EPM2A, BPNT1, TAF5L).  
29 These hub genes were located within the supergene, highlighting the importance of this gene  
30 complex in structuring regulatory networks across diverse tissues.

31

## 32 **Keywords**

33 Transcriptome, parental care, early life stress, nestling, RNAseq, ornithology

34

## 35 **Introduction**

36 Parents can have profound impacts on offspring development and fitness. Parental effects  
37 can manifest throughout the developmental period, both pre- and postnatally (reviewed in  
38 Meaney 2001, Lupien et al. 2009). Postnatal effects can be particularly critical in altricial species,  
39 where offspring rely entirely on their parents for proper development and growth. Parental effects  
40 in these species can be mediated through genetic and physiological aspects of the parent or result  
41 from parental behaviors during early development (Trivers 1972).

42 A major component of these parental effects is mediated by the mother, termed maternal  
43 effects. In altricial species, maternal effects are crucial in the prenatal stage, where the mother's  
44 genotype and/or phenotype directly influence the offspring phenotype (reviewed in Gluckman et  
45 al. 2008). In this case, offspring develop in a maternally created environment and are exposed  
46 and influenced by maternal hormones (Wolf & Wade 2009). Maternal hormones can accumulate  
47 in the prenatal environment (e.g. uterus, egg) and influence offspring physiology (reviewed in  
48 Cottrell & Secki 2009).

49 Beyond hormone mediated maternal effects, parental behaviors (both maternal and  
50 paternal) can also impact offspring. These parental effects can appear prenatally during nest  
51 building. Nest location will determine susceptibility to impacts from temperature or sun  
52 exposure, humidity, food availability, pollution, and predation (e.g. Lloyd & Martin 2004, Sofaer  
53 et al. 2012, Mulholland et al. 2018). However, the magnitude of parental effects is likely largest  
54 during the postnatal period, where offspring rely entirely on the parents for provisioning and  
55 must compete with siblings during feeding bouts. Thus, this postnatal environment, mediated

56 through parental care, can be a potential source of early life stress (ELS) in offspring, which may  
57 result in life-long fitness effects.

58 A prominent area of ELS research focuses on neural development and neuroendocrine  
59 signaling (McEwen et al. 2007). The HPA axis is among the most well studied physiological  
60 mechanisms of the stress response. ELS is associated with impaired neuroendocrine function and  
61 corresponding impaired HPA response, which leads to lifetime consequences in behavior and  
62 fitness (e.g. Heim et al. 2008, Crespi et al. 2012, Spencer 2017). Additionally, increased levels of  
63 ELS can result in altered behaviors as organisms develop and mature including symptoms of  
64 anxiety and depression in the postnatal environment (Noguera et al. 2017) and result in impaired  
65 behavior as reproductive adults, with ultimate consequences in fitness. For example, ELS can  
66 slow brain development in songbirds, leading to altered song learning and production, which  
67 directly impacts the ability to produce and recognize songs as adults, a crucial aspect of songbird  
68 reproduction (Spencer et al. 2003, MacDougall-Shackleton & Spencer 2012, Sewall et al. 2018)

69 Epigenetic impacts of ELS have also been extensively studied (Szyf et al. 2007, Szyf  
70 2009). In particular, the quality of parental care can have profound impacts on offspring health.  
71 Classic studies assessing maternal licking behavior in mice revealed strong epigenetic effects and  
72 corresponding physiological consequences in offspring receiving poor parental care (Liu et al.  
73 1997, Meaney et al. 2001, Weaver et al. 2004). While there are a variety of epigenetic marks,  
74 including histone modification and chromatin accessibility, changes in DNA methylation are  
75 often used as an indicator of ELS. Specifically, methylation of the exon 1<sub>F</sub> promoter for the  
76 glucocorticoid receptor, NR3C1, has received considerable attention. NR3C1 is often  
77 hypermethylated in offspring experiencing ELS, which has been linked to physiological disorders  
78 later in life (McGowan et al. 2009, Romens et al. 2014, Turecki & Meaney 2016). In general,

79 these epigenetic modifications are thought to alter transcriptional activity of genes in the  
80 modified genomic region. However, very few studies assess genome-wide transcription under  
81 ELS, particularly in the context of parental effects (but see: Weaver et al. 2006).

82 In this study, we studied the white-throated sparrow (WTSP, *Zonotrichia albicollis*) in  
83 order to assess the role of parents and ELS on offspring gene expression. WTSPs exist in two  
84 plumage morphs, tan (T) and white (W), that are found in both sexes and in roughly equal  
85 frequencies (Lowther 1961). These morphs are genetically determined by alternative alleles of a  
86 supergene (Schwander et al. 2014), resulting from a complex chromosomal rearrangement  
87 comprising multiple inversions (hereafter referred to as “inversion” or “inverted”). This inverted  
88 region contains ~1,100 genes on chromosome two, termed ZAL2<sup>m</sup> (Thornycroft 1975, Thomas  
89 et al. 2008, Romanov et al. 2009, Tuttle et al. 2016). W morphs are nearly always heterozygous  
90 for the inversion (ZAL2/ZAL2<sup>m</sup>) and T morphs are always homozygous (ZAL2/ZAL2) and do  
91 not contain the inversion (Thornycroft 1966, 1975). The morphs of both sexes differ  
92 dramatically in behavior, where W morphs are highly territorial, sing frequently, and maintain  
93 higher levels of hormones at different times of the breeding season. T morphs are far less  
94 territorial and aggressive and maintain lower levels of circulating hormones (Lowther 1962,  
95 Kopachna & Falls 1993, Tuttle 2003, Spinney et al. 2006, Swett & Breuner 2009, Horton &  
96 Holbertson 2010, Horton et al. 2014). Importantly, males of each morph differ in paternal  
97 investment (Knapton & Falls 1983). W morph males are promiscuous and provision nestlings  
98 very little. T morph males defend their within-pair paternity through mate guarding and are  
99 highly paternal. Additionally, morphs nearly always mate disassortatively, resulting in two stable  
100 pair types: T male x W female (TxW) and W male x T female (WxT) (Lowther 1961, Tuttle  
101 2003, Tuttle et al. 2016). Because males differ in paternal investment, this results in two distinct

102 parental care strategies. TxW pairs provide biparental care and WxT pairs provide female-biased  
103 parental care.

104 Thus, WxT pairs may be a source of ELS (via reduced provisioning) for nestlings. We  
105 expect nestlings in WxT nests to elicit a distinct transcriptional stress response relative to  
106 nestlings in TxW nests. Alternatively, W morph females may produce higher levels of oestradiol  
107 resulting from singing and territorial behavior (e.g. Horton et al. 2014), and this may act as a  
108 source of hormone mediated maternal effects in TxW nests. In this case, we may expect to see  
109 the opposite pattern, with a transcriptional stress response in nestlings from TxW nests as they  
110 cope with the immunosuppressive effects of estrogens (e.g. al-Alfaleq & Homeida 1998).  
111 Furthermore, each nest will produce nestlings of both morphs, offering the unique opportunity to  
112 investigate the interaction between offspring and parental morphs. As adults, W morphs must  
113 cope with high levels of energy expenditure via singing and territorial behavior relative to T  
114 morphs. Thus, we predicted W morph nestlings may be better suited to handle ELS mediated  
115 through female-biased parental care in WxT nests, or maternal effects in TxW nests, and we  
116 would see an elevated stress response in T morph nestlings in these nests. Lastly, we investigate  
117 morph-specific gene expression, independent of the pair type of the nestling, to assess the role of  
118 nestling morph (i.e. presence or absence of ZAL2<sup>m</sup> inversion) on nestling gene expression.

119

## 120 **Methods**

### 121 *Field based sample collection*

122 All nestling samples in this study came from a breeding population of WTSPs at the  
123 Cranberry Lake Biological Station in northern New York, USA (SUNY-ESF, 44.15°N, 74.78°W)  
124 and were collected during the 2015 breeding season. We only utilized samples collected during

125 the first clutch (June 6 - June 14, 2015), as WTSP males may increase paternal investment in  
126 replacement broods (Horton et al. 2014). Nestlings were measured daily (tarsus length, mass)  
127 from hatch date or upon locating a nest with nestlings. Nestlings were banded on days 5-7 post-  
128 hatch and ~80 $\mu$ L blood was collected in capillary tubes via brachial venipuncture.  
129 Approximately 60 $\mu$ L blood was preserved in Longmire's lysis buffer (Longmire et al. 1992) for  
130 genotyping and ~20 $\mu$ L was immediately placed in RNAlater. Within six hours of collection,  
131 samples were placed temporarily into liquid nitrogen, before being shipped overnight on dry ice  
132 to -80°C storage until RNA extraction. All animal sampling protocols were approved by the  
133 Indiana State University Institutional Animal Care and Use Committee (IACUC 562158-  
134 1:ET/RG, 562192-1:ET/RG).

135

### 136 *Molecular sexing & genotyping*

137 Nestling DNA was extracted from erythrocytes using the DNA IQ® magnetic extraction  
138 system (Promega Corp, Madison, WI USA). To determine sex and morph, we used PCR to  
139 fluorescently label and amplify a region of the chromo-helicase-DNA-binding gene, and a region  
140 of the vasoactive intestinal peptide following Griffiths (1998) and Michopolous et al. (2007). The  
141 PCR products were run and analyzed on an ABI PRISM™ 310 genetic analyzer.

142

### 143 *RNA extraction, library preparation, & sequencing*

144 We sampled a total of 32 nestlings for RNA extraction and sequencing. These samples  
145 represent 23 nestlings from eight TxW pairs and nine nestlings from three WxT pairs.  
146 Additionally, these data represent 18 females, 14 males, 15 T morph, and 17 W morph  
147 individuals.

148 We removed RNAlater and homogenized whole blood tissue samples with Tri-Reagent  
149 (Molecular Research Company). Total RNA was purified with a Qiagen RNeasy mini kit  
150 (Valencia, CA, USA), followed by DNase treatment and further purification. We quality assessed  
151 RNA with an Agilent Bioanalyzer (Wilmington, DE, USA). Both library preparation and  
152 sequencing were performed at the University of Illinois Roy J. Carver Biotechnology Center. A  
153 library was prepared for each RNA sample using the Illumina HT TruSeq (San Diego, CA, USA)  
154 stranded RNA sample prep kit. Libraries were distributed into four pools with equimolar  
155 concentrations and quantitated via qPCR. Each of the pools was sequenced on an individual lane  
156 of an Illumina HiSeq 2500 using the Illumina TruSeq SBS sequencing kit v4 producing 100  
157 nucleotide single-end reads.

158

#### 159 *Creation of masked reference genome*

160 The WTSP reference genome was generated from a male T morph individual (Tuttle et al.  
161 2016). Thus, the reference genome does not contain any sequence data from the ZAL2<sup>m</sup>  
162 inversion. To avoid any potential bias in mapping reads derived from W morph individuals onto  
163 a T morph genome, we generated a masked reference genome for this study. To do so, we used  
164 previously published whole genome sequences from three W morph adults (Tuttle et al. 2016).  
165 Reads were adapter trimmed with *Trim Galore!* v0.3.8  
166 (<https://github.com/FelixKrueger/TrimGalore>) and aligned to the WTSP reference genome with  
167 *bwa mem* v 0.7.10-r789. We converted and sorted the resulting SAM alignment to BAM format  
168 with *samtools view* and *samtools sort*, respectively (*samtools* v1.2, Li et al. 2009). We then  
169 merged all genomic scaffolds corresponding to the ZAL2<sup>m</sup> inversion with *samtools merge*. We  
170 called SNPs within the inversion using *samtools mpileup* and *bcftools call* v 1.2 (Li 2009). We



171 only kept SNPs that were heterozygous in each of the three individuals with *SnpSift* v 4.3p  
172 (Cingolani et al. 2012) and used these SNPs to mask the reference genome with *bedtools*  
173 *maskfasta* v 2.21.0 (Quinlan & Hall 2010).

174

175 *Quality control, read mapping, differential expression, & gene ontology*

176 We trimmed Illumina sequencing adapters from each of the 32 libraries with *Trim*  
177 *Galore!* v 0.3.8 which uses *Cutadapt* v1.7.1 (Martin 2011). Trimmed reads were then mapped to  
178 the masked reference genome with *STAR* v2.5.3a (Dobin et al. 2013). The mapping results were  
179 then quantified and assigned gene IDs with *htseq-count* v0.6.0 (Anders et al. 2015) specifying ‘-s  
180 reverse’ and ‘-i gene’. Genes with an average read count of  $\geq 5$  were used for downstream  
181 analyses.

182 All statistical analyses were performed with R v3.5.0 (R Core Team 2013). We identified  
183 outlier samples as having a normalized connectivity below -2.5 (Horvath 2011). Two samples,  
184 one T female and one T male representing an entire TxW nest, were identified as outliers and  
185 removed from all future analyses (Figure S1). We normalized reads accounting for sequencing  
186 depth and assessed differential expression (DE) with *DEseq2* (Love et al. 2014). We performed  
187 variance stabilizing transformation of reads in *DEseq2* and performed PCA and hierarchical  
188 clustering of gene expression profiles with *pcaExplorer* v2.6.0 (Marini 2018). DE analyses  
189 utilized pairwise comparisons between nestling morph and pair type (i.e. parental morphs). In  
190 each case, we controlled for sex, morph, and/or nest ID. We did not include nestling age in  
191 analyses, as most samples were 6 days old (n=21), limiting comparisons with nestlings aged Day  
192 5 (n=3) or Day 7 (n=6). Network analysis (see below) did not reveal any effect of age on  
193 variables of interest (morph, pair type; data not shown). We also tested for an interaction between

194 nestling morph and pair type utilizing a grouping variable as outlined in the *DEseq2* manual.  
195 *DEseq2* determines DE with a Wald test followed by Benjamini & Hochberg (1995) FDR  
196 correction. Genes were considered DE if the FDR corrected p-value was  $< 0.10$ . Details for each  
197 model run, including the R code used, are in this project's GitHub repository.

198 We next grouped DE genes into gene ontology (GO) categories with *GOrilla* (Eden et al.  
199 2007, 2009). For each *DEseq2* comparison, we ordered the list of genes based on ascending FDR  
200 values, excluding any genes in which *DEseq2* did not assign a FDR value. The WTSP genome is  
201 not completely annotated, so any loci without a gene symbol were excluded from GO analyses  
202 ( $n=1,926$ ). *GOrilla* places greater weight on genes located at the top of the list (i.e. DE genes),  
203 while accounting for the contribution of each gene in the given comparison. GO categories were  
204 considered significantly enriched if the FDR corrected p-value  $< 0.05$ . *GOrilla* does not support  
205 WTSP annotation; so, all analyses were based on homology to human gene symbols.

206  
207 *Weighted gene co-expression network analysis (WGCNA)*

208 We used the *WGCNA* package in R (Zhang & Horvath 2005, Langfelder & Horvath  
209 2008) to identify modules of co-expressed genes in our dataset. We first exported variance  
210 stabilizing transformed (vst) read counts from *DEseq2*, removed genes with an average vst  $< 5$   
211 across all 30 samples, and imported the subsequent list of 8,982 genes into *WGCNA*. To build the  
212 co-expression matrix, we chose a soft thresholding power ( $\beta$ ) value of 12, at which the network  
213 reaches scale-free topology (Figure S2). We generated a signed network with minimum module  
214 size of 30 genes and merged highly correlated modules (dissimilarity threshold = 0.20, which  
215 corresponds to  $R^2 = 0.80$ ). We then correlated the eigengene, which is the first principal

216 component of a module, of these merged modules with external traits (pair type, morph, sex, nest  
217 ID). Modules with  $p < 0.05$  were considered significantly correlated with a given trait.

218 To visualize the interaction of genes within a module, we generated the intramodular  
219 connectivity (IM) score for each gene, which represents the interconnection of module genes. We  
220 exported all IM scores for modules of interest and imported into *VisAnt* v5.51 (Hu et al. 2013) for  
221 visualization. To maximize network clarity, we only plotted the top 300 interactions based on IM  
222 scores. Thus, we only visualized the most connected genes. To identify hub genes, we visualized  
223 the Degree Distribution (DD) for the network and selected the most connected genes above a  
224 natural break in the distribution. This resulted in one to nine hub genes per module.

225 Lastly, to understand the biological function of modules correlated with traits of interest,  
226 we performed a target vs background GO analysis in *GOrilla*. For each module, we tested the  
227 assigned genes for each module against the entire list of 8,982 genes used for the *WGCNA*  
228 analysis. GO categories were significant with a FDR corrected p-value  $< 0.05$ .

229

## 230 **Results**

### 231 *Sequencing results*

232 We sequenced each sample to an average depth of 29.4 million reads (range = 16.2-58.5  
233 million reads). The 32 libraries were distributed into four pools in equimolar concentration. One  
234 pool contained only four samples, which corresponded to the four samples with lowest RNA  
235 concentrations. This pool was sequenced to an average depth of 56.17 million reads per library.  
236 The remaining three pools were sequenced to an average depth of 25.62 million reads per library.  
237 Samples mapped to our masked genome at an average rate of 91.08% (range = 88.19%-92.87%)

238 (Table S1). A total of 8,982 genes had count values  $\geq 5$  across all samples. Samples do not  
239 segregate by pair type or morph in clustering analyses (Figures S3, S4).

240

#### 241 *Differential Expression – Morph*

242 Testing for morph-specific expression resulted in 92 genes DE. Sixty-five of these genes  
243 were in the supergene (Table S2). Additionally, many of these 92 genes were up-regulated in W  
244 morph nestlings and function in innate immunity (e.g. IFIT5, IL20RA, EIF2AK2, RSAD2).  
245 There was GO enrichment of four categories, two of which are immunity related: “immune  
246 response” ( $p = 0.019$ ) and “defense response to virus” ( $p = 0.049$ ) (Table S3).

247

#### 248 *Differential Expression – Pair Type*

249 Pair type had the largest effect on gene expression, with 881 genes differentially  
250 expressed (DE) between offspring from the two different pair types ( $FDR < 0.10$ , Table S2).  
251 Many genes associated with stress responses were up-regulated in nestlings in WxT nests,  
252 including the glucocorticoid receptor (NR3C1), superoxide dismutase (SOD)1 & SOD2, DEP  
253 domain-containing mTOR-interacting protein (DEPTOR), and several ubiquitin-mediated  
254 proteolysis pathway genes (e.g. UBE2D3, PSMD3, PSMD6). Additionally, several immune  
255 system related genes were also up-regulated in WxT nests, including cytokines (e.g. IL2RA,  
256 IL7R), suppressor of cytokine signaling 1 (SOCS1), and five putative major histocompatibility  
257 complex (MHC) class I loci. No GO categories were significantly enriched, however.

258 We next tested for a morph-specific response to pair type. Within WxT nests, 40 genes  
259 were DE ( $p < 0.10$ ) between T and W morph nestlings, 12 of which are in the supergene.

260 Additionally, 34/40 genes are uniquely DE between morphs in WxT nests and do not overlap

261 with the overall list of 92 genes DE between morphs described above, suggesting a prominent  
262 role of the WxT pair type on nestling morph-specific gene expression. Only two genes (THSD7B  
263 & CFAP44) were DE between morphs within TxW nests, both of which are uniquely DE  
264 between morphs in TxW nests. No GO categories were enriched in either comparison.

265

#### 266 *WGCNA – Morph*

267 WGCNA revealed 26 modules, five of which were correlated with morph (Table 1,  
268 Figure 1). The light cyan module (183 genes,  $R^2=0.67$ ,  $p=5 \times 10^{-5}$ ) and white module (72 genes,  
269  $R^2=-0.66$ ,  $p=9 \times 10^{-5}$ ) contained genes up-regulated and down-regulated respectively in W morph  
270 nestlings. These genes are primarily located in the chromosomal inversion (light cyan = 70/183  
271 genes, white = 40/72) (Figure S5). The hubs of each of these modules are also located in the  
272 chromosomal inversion (Table 1, Figure S5). Additionally, the sky blue module (58 genes,  
273  $R^2=0.53$ ,  $p=0.003$ ) and dark red module (102 genes,  $R^2=0.47$ ,  $p=0.009$ ) (Figure S6) contained  
274 genes up-regulated in W morph nestlings and many of these genes overlap with the immune  
275 related genes described in the morph DE tests above. Additionally, the hubs of these networks  
276 (e.g. sky blue: EIF2AK2, IFIT5, OASL; dark red: TRAF5) (Table 1) reflect a conserved innate  
277 immunity network structure in avian blood (Kernbach et al., in review) (Figure S6).

278

#### 279 *WGCNA – Pair Type*

280 We found seven modules correlated with pair type (Table 2, Figure 1). The blue module  
281 represented genes that are up-regulated in nestlings from WxT nests (1,142 genes,  $R^2 = -0.45$ ,  
282  $p=0.01$ ). This module contained both the largest number of genes and correspondingly strongest  
283 functional enrichment. Many of these GO enrichments were related to protein function, resulting

284 from the presence of ribosomal genes. Interestingly, several GO categories for metabolism,  
285 catabolism, and proteolysis were also enriched, driven by genes encoding ubiquitin-conjugating  
286 enzymes and proteasome subunits (e.g. “proteasomal protein catabolic process”,  $p=2.34 \times 10^{-4}$ ;  
287 “proteasome-mediated ubiquitin-dependent protein catabolic process”,  $p=5.32 \times 10^{-4}$ ) (Table S4).  
288 Many of these (e.g. PSMF1, PSMD3, PSMD6, UBE2D2, UBE2D3, UBE3C) were also DE  
289 between offspring of the two pair types (Figure 2). Lastly, the blue module contains one hub  
290 gene, NDUFB3 (DD=42) (Figure 2), which is involved in the mitochondrial electron transport  
291 chain.

292 The remaining modules were not enriched for any GO categories, but the tan and light  
293 green modules represented candidate stress response networks. These modules showed  
294 contrasting expression patterns in nestlings from WxT nests. Within the tan module (335 genes,  
295  $R^2=-0.61$ ,  $p=3 \times 10^{-4}$ ), genes were up-regulated and DEPTOR was the single hub (DD=39), which  
296 functions as an inhibitor of the mTOR pathway in response to stress (e.g. Desantis et al. 2015)  
297 (Figure 3). The tan module also contained NR3C1, which is activated in response to increased  
298 glucocorticoid secretion. Lastly, the light green module (116 genes,  $R^2=0.60$ ,  $p=4 \times 10^{-4}$ )  
299 contained genes down-regulated in TxW nests. There were three hub genes (DD > 28), CDK19,  
300 CHD4, and EPG5, each with previously described roles in the stress response (Figure 4). We did  
301 not observe modules correlated with pair type that were also correlated with nestling morph or  
302 sex, suggesting there is no morph or sex-specific response to a given pair type at the network  
303 level.

304

305 **Discussion**

306 By assessing genome-wide transcription in nestlings raised by different WTSP pair types,  
307 a proxy for parental investment, we have identified distinct transcriptomic signatures that suggest  
308 WxT pairs (female-biased parental care) induce a stress response in developing nestlings relative  
309 to TxW pairs. This is reflected both by differential expression of several genes involved in  
310 protein degradation as well as networks of co-expressed genes with stress response hubs.  
311 Additionally, we identified morph-specific gene expression driven by innate immunity genes and  
312 genes located in the chromosome 2 supergene. As adults, the genes within the supergene strongly  
313 influence the WTSP neural transcriptome (Balakrishnan et al. 2014, Zinzow-Kramer et al. 2015).  
314 Our results here suggest that as nestlings, parental genotypes and associated behaviors, rather  
315 than nestling genotype, have the strongest influence on the nestling transcriptome.

316

317 *Gene expression differences resulting from pair type, a proxy for parental care*

318 WTSP morphs differ in the amount of paternal provisioning; with W morph males  
319 providing less than their T male counterparts. Therefore, we expected nestlings in WxT nests to  
320 be stressed nutritionally or to suffer increased sibling competition due to uniparental feeding  
321 visits (e.g. Yosef et al. 2012). Indeed, we find 881 genes DE between nestlings raised under the  
322 two pair types. Many of these genes function in the proteasome or ubiquitin-mediated  
323 proteolysis. Cells naturally use the proteasome for degradation of proteins targeted by the  
324 ubiquitination process, but genes involved in proteasome formation (e.g. PSMD6, PSMD11) and  
325 ubiquitination (e.g. UBE2B) are up-regulated in cells experiencing mild oxidative stress (Aiken  
326 et al. 2011, Shang & Taylor 2011, Livneh et al. 2016) or organisms experiencing abiotic stress  
327 (Dhanasiri et al. 2013, Tomalty et al. 2015). Thus, up-regulation of these genes in nestlings from  
328 WxT nests suggests they are responding to oxidative stress. As a result, there is a physiological

329 cost to having a W morph father and T morph mother at the nestling stage, since W morph males  
330 invest more in reproduction and territory defense than provisioning.

331 To complement our differential expression approach, we also constructed co-expression  
332 networks with *WGCNA*. *WGCNA* identifies modules of co-regulated genes blind to the  
333 experimental design. These modules are then correlated with external traits, offering a systems  
334 level view into how conditions impact transcriptional networks. Within these networks, we can  
335 then perform GO analyses as described above and identify network hubs, which are the most  
336 highly connected genes within that network. Using this approach, we identified 26 modules of  
337 co-regulated genes in this dataset (Figure 1). Seven of these modules were significantly  
338 correlated with parental pair type. The blue module contains genes that are up-regulated in  
339 nestlings in WxT nests. The blue module hub gene was *NDUFB3* (Module Membership  
340 [MM]=0.938, DD=42) (Figure 2), which encodes a subunit of the mitochondrial membrane  
341 respiratory chain. Interestingly, many of the same proteolysis-related genes highlighted in the  
342 differential expression results are also present in this module, resulting in the enrichment of  
343 several metabolism and stress-related GO categories (Table S4).

344 Two modules, light green and tan, contained stress responsive hub genes. The light green  
345 module contains genes that are down-regulated in nestlings in WxT nests, with three hub genes:  
346 *CDK19*, *CHD4*, and *EPG5* (Figure 4). The absence of *EPG5* expression (via knockout) and  
347 reduction in *CHD4* expression (via knockdown) has been associated with increased DNA  
348 damage (Zhao et al. 2013, Larsen et al. 2010). Similarly, down-regulation of *CDK19* following  
349 knockdown is associated with an increased stress response (Audetat et al. 2017). Down-  
350 regulation of these genes in these nestlings could be indicative of increased cellular damage. The  
351 tan module contains genes up-regulated in nestlings from WxT nests and contains one hub gene,



352 DEPTOR, which is an inhibitor of mTOR signaling (Figure 3). The exact role of DEPTOR  
353 remains unclear, but up-regulation likely inhibits the mTORC1 pathway to reduce endoplasmic  
354 reticulum stress, promote cell survival, and avoid apoptosis (Peterson et al. 2009, Desantis et al.  
355 2015, Catena et al. 2016).

356 Up-regulation in these nestlings and the high connectivity of DEPTOR to other co-  
357 expressed genes provides further support for a transcriptional stress response within WxT nests.  
358 The tan module also contains two well-studied stress responsive genes, superoxide dismutase 2  
359 (SOD2) and the glucocorticoid receptor (NR3C1). SOD2 mitigates the effects of exposure to  
360 reactive oxygen species by scavenging free radicals (Zelko et al. 2002). NR3C1 binds  
361 glucocorticoids and has primarily been studied in the context of ELS and methylation of an  
362 upstream promoter. NR3C1 methylation is often associated with down-regulation of NR3C1  
363 (e.g. McGowan et al. 2009) and impairment of the HPA axis, but up-regulation following  
364 methylation has also been observed as part of the stress response (Turner et al. 2006, Bockmühl  
365 et al. 2015). Up-regulation observed here directly implicates the HPA axis and suggests these  
366 nestlings may be activating SOD2 and NR3C1 to cope with elevated levels of reactive oxygen  
367 species and corticosterone, respectively. However, further work is needed to investigate stress  
368 physiology, corticosterone levels, and uncover the epigenetic state of NR3C1 in these nestlings  
369 and how this may relate to ELS.

370 Importantly, we did not measure provisioning by the parents of these nestlings but instead  
371 used pair type as a proxy for parental care. Reduced provisioning by W morph males appears to  
372 be stable across populations resulting in female-biased parental care in WxT nests (Knapton &  
373 Falls 1983, Horton et al. 2014). Therefore, reduced parental care is a likely a source of  
374 behaviorally mediated maternal or paternal effect (see Crean & Bonduriansky 2014). We cannot,

375 however, ignore the possibility that provisioning rates did not differ between the nests we  
376 sampled. Previous work revealed no effect of parental pair type on nestling mass (Knapton et al.  
377 1984, Tuttle et al. 2017), and nestlings did not differ in mass at time of sampling between the  
378 TxW and WxT nests used in this study (Smith et al. in review). Increased provisioning by  
379 females to compensate for reduced care by males could explain this observation. In this scenario  
380 reduced brooding and increased maternal separation; could also negatively impact nestling  
381 physiology and act as a source of ELS (reviewed in Ledón-Rettig et al. 2013). Surprisingly,  
382 given the gene expression findings described above, a recent study in the same study population  
383 did not detect differences in reactive oxygen metabolites in plasma of offspring of the two  
384 different pair types (Grunst et al. 2018b). Our finding of transcriptional differences in stress-  
385 responsive genes in the absence of significant phenotypic differences highlights the utility of  
386 RNA-seq to uncover subtle changes in physiology.

387 Our study was carried out in the field as part of a long-term study and is limited by the  
388 fact that was a non-experimental study. We aimed to mitigate potential environmental confounds  
389 by restricting sampling of nestlings to a short time period of nine days. Certainly, the  
390 environment may influence gene expression in our samples, but consistent changes among the  
391 samples in the two pair types suggest the role of parents is a significant driver of nestling gene  
392 expression, rather than temporal or spatial environmental variation.

393 Hormone-mediated maternal effects provide another potential driver of the observed  
394 expression differences among pair types. In previous studies of WTSP, only oestradiol has been  
395 shown to differ between adult female morphs during the breeding season and is higher in W  
396 morph females during the pre-laying and laying stages (Horton et al. 2014). No baseline  
397 differences in any other hormone measured to date (corticosterone, testosterone, DHEA, DHT)

398 have been described during the breeding season (Spinney et al. 2006, Swett & Breuner 2009,  
399 Horton & Holberton et al. 2010, Horton et al. 2014), which would suggest that hormone  
400 deposition into eggs does not dramatically differ between the morphs. Additional work is needed  
401 to investigate the potential role of maternal effects in the WTSP, including measuring hormone  
402 levels in both the egg and as nestlings. Although we cannot rule out hormone-mediated maternal  
403 effects as a source of expression differences observed in offspring, given the current knowledge  
404 of the system the differences we observed are likely driven by differences in parental care.

405

#### 406 *Morph-specific gene expression*

407 We were also interested in morph-specific gene expression and how morphs may respond  
408 to differences in pair type. We found 92 genes DE between morphs, including many innate  
409 immune-related genes and genes located within the supergene (65/92 genes, Table S2). WGCNA  
410 revealed five modules correlated with morph (Figure 1). These included two innate immunity-  
411 related modules with up-regulation in W morphs (Dark Red & Sky Blue) and two modules  
412 predominantly containing genes located in the supergene (White = 40/72, Light Cyan = 70/183)  
413 (Figures S5, S6). The sky blue module contains nine hub genes and the dark red module contains  
414 one hub gene, both of which include well-studied anti-viral genes (e.g. sky blue: OASL, RSAD2;  
415 dark red: TRAF5). These genes also form a co-expression module in avian blood following West  
416 Nile virus infection (Kernbach et al., in review). Adult WTSP morphs differ in their ability to  
417 clear infection (Boyd et al. 2018), so the immune activation here may be indicative of an  
418 increased parasite load in W morph nestlings, although further investigation is required. The light  
419 cyan module contains genes up-regulated in W morph nestlings and contains eight hub genes,  
420 each located in the supergene (Table 1). Three of these, EPM2A, BPNT1, and TAF5L, were also

421 identified as hub genes in neural tissues of adult W morph males (Zinzow-Kramer et al. 2015).  
422 These nestlings thus exhibit transcriptional changes driven by the inversion prior to any  
423 phenotypic or behavioral differences. Additionally, the conservation of network hub genes in a  
424 different tissue and life stage highlights avenues for further investigation into WTSP  
425 transcription.

426         Given adult W morphs are highly territorial, aggressive, sing frequently, and maintain  
427 higher levels of stress hormones, we predicted W morph nestlings might be primed to handle  
428 stress and fare better in WxT nests than their T morph siblings. Despite broad gene expression  
429 differences between the morphs, within pair types morph-specific expression was limited. In part  
430 due to small sample size, nestlings in TxW nests only have two genes DE between morphs. There  
431 is a larger effect of morph within WxT nests, where the number of DE genes increased to 40.  
432 These genes encompassed a wide range of gene functions without any obvious stress-related  
433 candidate genes. Of these 40 genes, 34 are uniquely DE within WxT nests and do not overlap  
434 with the overall list of 92 genes DE between morphs using all samples. Interestingly,  
435 glucocorticoid-induced transcript 1 (GLCCI1) is up-regulated in W morph nestlings in WxT  
436 nests. The function of GLCCI1 remains unclear (Kim et al. 2016), but expression differences  
437 between morphs observed here implicates the role of glucocorticoids in response to pair type.  
438 This suggests that nestling morphs may respond differently to the parental pair type though larger  
439 sample sizes will be needed to explore this further.

440

## 441 **Conclusions**

442         Using the WTSP, a system with alternative parental care strategies, we show that  
443 nestlings in WxT nests (female-biased parental care) have increased expression of stress-related

444 genes, and parental genotypes may act as a source of ELS in the species. Nestling morph also  
445 influences transcription, but pair type appears to have the greatest effect on their transcriptome.  
446 Combined, this supports the parental effects hypothesis (Wade 1998, Schrader et al. 2018), where  
447 offspring phenotypes are primarily a result of the nest environment and care received, rather than  
448 from offspring genotypes (i.e. T vs W). Nearly 54% of observed pairs have been WxT (Tuttle et  
449 al. 2016). Thus, roughly half of the nestlings in every population will experience reduced  
450 parental care. Our results suggest that these differences in parental care have at least short-term  
451 consequences on offspring physiology. While we have identified impacts at the level of  
452 transcription, an integrative approach assessing nestling WTSP physiology, for example by  
453 combining epigenetic and neuroendocrine approaches, will further elucidate the consequences of  
454 variation in parental pair type. Importantly, it remains unclear whether female-biased parental  
455 care or differences in maternal effects translate into long-term fitness consequences for offspring.  
456 WTSPs have been studied extensively as adults, but very rarely in other life stages. W morph  
457 males and T morph females exhibit earlier reproductive and actuarial senescence, potentially  
458 resulting from the high energy expenditure lifestyle of W morph males and biased parental care  
459 given by T morph females (Grunst et al. 2018a, Grunst et al. 2018c). There also appears to be  
460 seasonal variation in fitness between the morphs as adults. Following cold, wet winters, W  
461 morph males exhibit lower recruitment in the breeding grounds, leading to an overproduction of  
462 W morph male nestlings, potentially to stabilize morph frequencies in the population (Tuttle et al.  
463 2017). Thus, there is a cost associated with parental genotype, as this less cooperative  
464 reproductive strategy accelerates senescence. We show here that this cost is also translated into  
465 nestlings within WxT nests via increased stress-related gene expression. This work sets the stage

466 to further explore morph-specific fitness consequences in nestlings experiencing alternative  
467 parental care strategies.

468

## 469 **Acknowledgements**

470 We acknowledge Lindsay Forrette, Andrea Grunst, and Melissa Grunst for assistance in the field,  
471 Sarah Ford for assistance with molecular work, Rachel Wright for WGCNA code, and Cranberry  
472 Lake Biological Station. Funding provided by East Carolina University, Indiana State University,  
473 The National Science Foundation (grant no. DUE-0934648) and the National Institutes of Health  
474 (grant no. 1R01Gm084229 to E.M.T and R.A.G.) and a Sigma Xi Grants in Aid of Research  
475 award to DJN. Birds were banded with color bands and a Fish and Wildlife band (Master  
476 Banding Permit 22296 to EMT and permit 24105 to RAG). Dr. Alvaro Hernandez and Chris  
477 Wright provided guidance and oversight on sequencing carried out at the University of Illinois.  
478 All methods were conducted in accordance with legal and ethical standards and were approved  
479 by Indiana State University's Institutional Animal Care and Use Committee (protocols 562158-  
480 1:ET/RG and 562192-1:ET/RG).

481

## 482 **References**

- 483 Aiken, C. T., Kaake, R. M., Wang, X., & Huang, L. (2011). Oxidative Stress-Mediated Regulation of Proteasome  
484 Complexes. *Molecular & Cellular Proteomics*, *10*(5).
- 485 al-afaleq, A. I., & Homeida, A. M. (1998). Effects of Low Doses of Oestradiol, Testosterone and  
486 Dihydrotestosterone on the Immune Response of Broiler Chicks. *Immunopharmacology and*  
487 *Immunotoxicology*, *20*(2), 315–327. doi:[10.3109/08923979809038547](https://doi.org/10.3109/08923979809038547)
- 488 Alvarez, M., Schrey, A. W., & Richards, C. L. (2015). Ten years of transcriptomics in wild populations: what have  
489 we learned about their ecology and evolution? *Molecular Ecology*, *24*(4), 710–725. doi:[10.1111/mec.13055](https://doi.org/10.1111/mec.13055)
- 490 Anders, S., Pyl, P. T., & Huber, W. (2015). HTSeq-A Python framework to work with high-throughput sequencing  
491 data. *Bioinformatics*, *31*(2), 166–169. doi:[10.1093/bioinformatics/btu638](https://doi.org/10.1093/bioinformatics/btu638)
- 492 Audetat, K. A., Galbraith, M. D., Odell, A. T., Lee, T., Pandey, A., Espinosa, J. M., ... Taatjes, D. J. (2017). A  
493 kinase-independent role for CDK19 in p53 response. *Molecular and Cellular Biology*. Retrieved from  
494 <http://mcb.asm.org/content/early/2017/04/12/MCB.00626-16.abstract>
- 495 Balakrishnan, C. N., Mukai, M., Gonser, R. A., Wingfield, J. C., London, S. E., Tuttle, E. M., & Clayton, D. F.  
496 (2014). Brain transcriptome sequencing and assembly of three songbird model systems for the study of  
497 social behavior. *PeerJ*, *2*, e396–e396. doi:[10.7717/peerj.396](https://doi.org/10.7717/peerj.396)

- 498 Benjamini, Y., & Hochberg, Y. (1995). Controlling the false discovery rate - a practical and powerful approach to  
499 multiple testing. *Journal of the Royal Statistical Society Statistical Methodology: Series B.*, 57.
- 500 Bockmühl, Y., Patchev, A. V., Madejska, A., Hoffmann, A., Sousa, J. C., Sousa, N., ... Spengler, D. (2015).  
501 Methylation at the CpG island shore region upregulates Nr3c1 promoter activity after early-life stress.  
502 *Epigenetics*, 10(3), 247–257. doi:[10.1080/15592294.2015.1017199](https://doi.org/10.1080/15592294.2015.1017199)
- 503 Boyd, R. J., Kelly, T. R., MacDougall-Shackleton, S. A., & MacDougall-Shackleton, E. A. (2018). Alternative  
504 reproductive strategies in white-throated sparrows are associated with differences in parasite load following  
505 experimental infection. *Biology Letters*, 14(7). Retrieved from  
506 <http://rsbl.royalsocietypublishing.org/content/14/7/20180194.abstract>
- 507 Catena, V., Bruno, T., De Nicola, F., Goeman, F., Pallocca, M., Iezzi, S., ... Fanciulli, M. (2016). Deptor  
508 transcriptionally regulates endoplasmic reticulum homeostasis in multiple myeloma cells. *Oncotarget*,  
509 7(43), 70546–70558. doi:[10.18632/oncotarget.12060](https://doi.org/10.18632/oncotarget.12060)
- 510 Cingolani, P., Patel, V., Coon, M., Nguyen, T., Land, S., Ruden, D., & Lu, X. (2012). Using *Drosophila*  
511 *melanogaster* as a Model for Genotoxic Chemical Mutational Studies with a New Program, SnpSift.  
512 *Frontiers in Genetics*, 3, 35–35.
- 513 Cottrell, E. C., & Secki, J. R. (2009). Prenatal stress, glucocorticoids and the programming of adult disease.  
514 *Frontiers in Behavioral Neuroscience*, 3. doi:[10.3389/neuro.08.019.2009](https://doi.org/10.3389/neuro.08.019.2009)
- 515 Crean, A. J., & Bonduriansky, R. (2014). What is a paternal effect? *Trends in Ecology & Evolution*, 29(10), 554–  
516 559. doi:[10.1016/j.tree.2014.07.009](https://doi.org/10.1016/j.tree.2014.07.009)
- 517 Crespi, E. J., Williams, T. D., Jessop, T. S., & Delehanty, B. (2012). Life history and the ecology of stress: how do  
518 glucocorticoid hormones influence life-history variation in animals? *Functional Ecology*, 27(1), 93–106.  
519 doi:[10.1111/1365-2435.12009](https://doi.org/10.1111/1365-2435.12009)
- 520 Desantis, A., Bruno, T., Catena, V., De Nicola, F., Goeman, F., Iezzi, S., ... Fanciulli, M. (2015). Che-1-induced  
521 inhibition of mTOR pathway enables stress-induced autophagy. *The EMBO Journal*, 34(9), 1214 LP –  
522 1230.
- 523 Dhanasiri, A. K. S., Fernandes, J. M. O., & Kiron, V. (2013). Liver Transcriptome Changes in Zebrafish during  
524 Acclimation to Transport-Associated Stress. *PLOS ONE*, 8(6), e65028–e65028.
- 525 Dobin, A., Davis, C. A., Schlesinger, F., Drenkow, J., Zaleski, C., Jha, S., ... Gingeras, T. R. (2013). STAR:  
526 ultrafast universal RNA-seq aligner. *Bioinformatics*, 29(1), 15–21.
- 527 Eden, E., Lipson, D., Yogev, S., & Yakhini, Z. (2007). Discovering Motifs in Ranked Lists of DNA Sequences.  
528 *PLOS Computational Biology*, 3(3), e39–e39.
- 529 Eden, E., Navon, R., Steinfeld, I., Lipson, D., & Yakhini, Z. (2009). GOrrilla: a tool for discovery and visualization  
530 of enriched GO terms in ranked gene lists. *BMC Bioinformatics*, 10(1), 48–48. doi:[10.1186/1471-2105-10-  
531 48](https://doi.org/10.1186/1471-2105-10-48)
- 532 Gluckman, P. D., Hanson, M. A., Cooper, C., & Thornburg, K. L. (2008). Effect of In Utero and Early-Life  
533 Conditions on Adult Health and Disease. *New England Journal of Medicine*, 359(1), 61–73.  
534 doi:[10.1056/NEJMr0708473](https://doi.org/10.1056/NEJMr0708473)
- 535 Griffiths, R., Double, M. C., Orr, K., & Dawson, R. J. G. (1998). A DNA test to sex most birds. *Molecular Ecology*,  
536 7(8), 1071–1075. doi:[10.1046/j.1365-294x.1998.00389.x](https://doi.org/10.1046/j.1365-294x.1998.00389.x)
- 537 Grunst, A. S., Grunst, M. L., Formica, V. A., Korody, M. L., Betuel, A. M., Barcelo-Serra, M., ... Tuttle, E. M.  
538 (2018a). Morph-Specific Patterns of Reproductive Senescence: Connections to Discrete Reproductive  
539 Strategies. *The American Naturalist*, 191(6), 744–755. doi:[10.1086/697377](https://doi.org/10.1086/697377)
- 540 Grunst, A. S., Grunst, M. L., Gonser, R. A., & Tuttle, E. M. (2018b). Developmental stress and telomere dynamics  
541 in a genetically polymorphic species. *Journal of Evolutionary Biology*. doi:[10.1111/jeb.13400](https://doi.org/10.1111/jeb.13400)
- 542 Grunst, M.L., Grunst, A.S., Formica, V.A., Korody, M.L., Betuel, A.M., Barcelo-Serra, M., Gonser, R.A., Tuttle,  
543 E.M. (2018c). Actuarial senescence in a dimorphic bird: different rates of ageing in morphs with discrete  
544 reproductive strategies. *Proceedings of the Royal Society B: Biological Sciences*, 2018205. In Press.
- 545 Heim, C., Newport, D. J., Mletzko, T., Miller, A. H., & Nemeroff, C. B. (2008). The link between childhood trauma  
546 and depression: Insights from HPA axis studies in humans. *Psychoneuroendocrinology*, 33(6), 693–710.  
547 doi:[10.1016/j.psyneuen.2008.03.008](https://doi.org/10.1016/j.psyneuen.2008.03.008)
- 548 Horton, B. M., & Holberton, R. L. (2010). Morph-Specific Variation in Baseline Corticosterone and the  
549 Adrenocortical Response in Breeding White-Throated Sparrows (*Zonotrichia albicollis*). *The Auk*, 127(3),  
550 540–548. doi:[10.1525/auk.2010.09096](https://doi.org/10.1525/auk.2010.09096)

- 551 Horton, B. M., Moore, I. T., & Maney, D. L. (2014). New insights into the hormonal and behavioural correlates  
552 of polymorphism in white-throated sparrows, *Zonotrichia albicollis*. *Animal Behaviour*, *93*, 207–219.  
553 doi:[10.1016/j.anbehav.2014.04.015](https://doi.org/10.1016/j.anbehav.2014.04.015)
- 554 Horvath, S. (2011). *Weighted network analysis: application in genomics and systems biology*. New York, NY:  
555 Springer.
- 556 Hu, Z., Chang, Y.-C., Wang, Y., Huang, C.-L., Liu, Y., Tian, F., ... DeLisi, C. (2013). VisANT 4.0: Integrative  
557 network platform to connect genes, drugs, diseases and therapies. *Nucleic Acids Research*, *41*(W1), W225–  
558 W231.
- 559 Kernbach, M.E., Newhouse, D.J., Miller, J.M., Hall, R.J., Gibbons, J., Oberstaller, J., Selechnik, D., Jiang, R.,  
560 Unnasch, T.R., Balakrishnan, C.N., & L.B. Martin. Light pollution increases West Nile virus competence of  
561 a ubiquitous passerine reservoir species. *In review*.
- 562 Kim, S.-H., Kim, H.-J., & Kim, C.-W. (2016). GLCCI1 is a novel component associated with the PI3K signaling  
563 pathway in podocyte foot processes. *Experimental & Molecular Medicine*, *48*(5), e233–e233.  
564 doi:[10.1038/emm.2016.28](https://doi.org/10.1038/emm.2016.28)
- 565 Knapton, R. W., & Falls, J. B. (1983). Differences in parental contribution among pair types in the polymorphic  
566 White-throated Sparrow. *Canadian Journal of Zoology*, *61*(6), 1288–1292. doi:[10.1139/z83-173](https://doi.org/10.1139/z83-173)
- 567 Knapton, R. W., Cartar, R. V., & Falls, J. B. (1984). A Comparison of Breeding Ecology and Reproductive Success  
568 between Morphs of the White-Throated Sparrow. *The Wilson Bulletin*, *96*(1), 60–71.
- 569 Kopachena, J. G., & Falls, J. B. (1993). Aggressive Performance as a Behavioral Correlate of Plumage  
570 Polymorphism in the White-Throated Sparrow (*Zonotrichia albicollis*). *Behaviour*, *124*(3/4), 249–266.
- 571 Langfelder, P., & Horvath, S. (2008). WGCNA: an R package for weighted correlation network analysis. *BMC*  
572 *Bioinformatics*, *9*(1), 559–559. doi:[10.1186/1471-2105-9-559](https://doi.org/10.1186/1471-2105-9-559)
- 573 Larsen, D. H., Poinson, C., Gudjonsson, T., Dinant, C., Payne, M. R., Hari, F. J., ... Lukas, J. (2010). The  
574 chromatin-remodeling factor CHD4 coordinates signaling and repair after DNA damage. *The Journal of*  
575 *Cell Biology*, *190*(5), 731 LP – 740.
- 576 Ledon-Rettig, C. C., Richards, C. L., & Martin, L. B. (2013). Epigenetics for behavioral ecologists. *Behavioral*  
577 *Ecology*, *24*(2), 311–324. doi:[10.1093/beheco/ars145](https://doi.org/10.1093/beheco/ars145)
- 578 Li, H. (2011). A statistical framework for SNP calling, mutation discovery, association mapping and population  
579 genetical parameter estimation from sequencing data. *Bioinformatics*, *27*(21), 2987–2993.
- 580 Li, H. (2013). Aligning sequence reads, clone sequences and assembly contigs with BWA-MEM. *ArXiv:1303.3997*  
581 [*q-Bio*]. Retrieved from <http://arxiv.org/abs/1303.3997>
- 582 Li, H., Handsaker, B., Wysoker, A., Fennell, T., Ruan, J., Homer, N., ... Subgroup, 1000 Genome Project Data  
583 Processing. (2009). The Sequence Alignment/Map format and SAMtools. *Bioinformatics*, *25*(16), 2078–  
584 2079.
- 585 Liu, D., Diorio, J., Tannenbaum, B., Caldji, C., Francis, D., Freedman, A., ... Meaney, M. J. (1997). Maternal Care,  
586 Hippocampal Glucocorticoid Receptors, and Hypothalamic-Pituitary-Adrenal Responses to Stress. *Science*,  
587 *277*(5332), 1659 LP – 1662.
- 588 Livneh, I., Cohen-Kaplan, V., Cohen-Rosenzweig, C., Avni, N., & Ciechanover, A. (2016). The life cycle of the 26S  
589 proteasome: from birth, through regulation and function, and onto its death. *Cell Research*, *26*, 869–869.
- 590 Lloyd, J. D., & Martin, T. E. (2004). Nest-site preference and maternal effects on offspring growth. *Behavioral*  
591 *Ecology*, *15*(5), 816–823. doi:[10.1093/beheco/arl085](https://doi.org/10.1093/beheco/arl085)
- 592 Love, M. I., Huber, W., & Anders, S. (2014). Moderated estimation of fold change and dispersion for RNA-seq data  
593 with DESeq2. *Genome Biology*, *15*(12), 550–550. doi:[10.1186/s13059-014-0550-8](https://doi.org/10.1186/s13059-014-0550-8)
- 594 Lowther, J. K. (1961). Polymorphism in the white-throated sparrow, *Zonotrichia albicollis* (Gmelin). *Canadian*  
595 *Journal of Zoology*, *39*(3), 281–292. doi:[10.1139/z61-031](https://doi.org/10.1139/z61-031)
- 596 Lupien, S. J., McEwen, B. S., Gunnar, M. R., & Heim, C. (2009). Effects of stress throughout the lifespan on the  
597 brain, behaviour and cognition. *Nature Reviews Neuroscience*, *10*(6), 434–445. doi:[10.1038/nrn2639](https://doi.org/10.1038/nrn2639)
- 598 MacDougall-Shackleton, S. A., & Spencer, K. A. (2012). Developmental stress and birdsong: current evidence and  
599 future directions. *Journal of Ornithology*, *153*(1), 105–117. doi:[10.1007/s10336-011-0807-x](https://doi.org/10.1007/s10336-011-0807-x)
- 600 Martin, M. (2011). Cutadapt removes adapter sequences from high-throughput sequencing reads. *EMBnet.Journal*,  
601 *17*(1), 10–10. doi:[10.14806/ej.17.1.200](https://doi.org/10.14806/ej.17.1.200)
- 602 McEwen, B. S. (2007). Physiology and Neurobiology of Stress and Adaptation: Central Role of the Brain.  
603 *Physiological Reviews*, *87*(3), 873–904. doi:[10.1152/physrev.00041.2006](https://doi.org/10.1152/physrev.00041.2006)



- 604 McGowan, P. O., Sasaki, A., D'Alessio, A. C., Dymov, S., Labonté, B., Szyf, M., ... Meaney, M. J. (2009).  
605 Epigenetic regulation of the glucocorticoid receptor in human brain associates with childhood abuse. *Nature*  
606 *Neuroscience*, 12, 342–342.
- 607 Meaney, M. J. (2001). Maternal Care, Gene Expression, and the Transmission of Individual Differences in Stress  
608 Reactivity Across Generations. *Annual Review of Neuroscience*, 24(1), 1161–1192.  
609 doi:[10.1146/annurev.neuro.24.1.1161](https://doi.org/10.1146/annurev.neuro.24.1.1161)
- 610 Michopoulos, V., Maney, D. L., Morehouse, C. B., & Thomas, J. W. (2007). A genotyping assay to determine  
611 plumage morph in the white-throated sparrow (*Zonotrichia albicollis*). *The Auk*, 124(4), 1330.  
612 doi:[10.1642/0004-8038\(2007\)124\[1330:AGATDP\]2.0.CO;2](https://doi.org/10.1642/0004-8038(2007)124[1330:AGATDP]2.0.CO;2)
- 613 Mulholland, T. I., Ferraro, D. M., Boland, K. C., Ivey, K. N., Le, M.-L., LaRiccia, C. A., ... Francis, C. D. (2018).  
614 Effects of Experimental Anthropogenic Noise Exposure on the Reproductive Success of Secondary Cavity  
615 Nesting Birds. *Integrative and Comparative Biology*. doi:[10.1093/icb/icy079](https://doi.org/10.1093/icb/icy079)
- 616 Noguera, J. C., Kim, S.-Y., & Velando, A. (2017). Family-transmitted stress in a wild bird. *Proceedings of the*  
617 *National Academy of Sciences*. Retrieved from  
618 <http://www.pnas.org/content/early/2017/06/06/1706164114.abstract>
- 619 Peterson, T. R., Laplante, M., Thoreen, C. C., Sancak, Y., Kang, S. A., Kuehl, W. M., ... Sabatini, D. M. (2009).  
620 DEPTOR Is an mTOR Inhibitor Frequently Overexpressed in Multiple Myeloma Cells and Required for  
621 Their Survival. *Cell*, 137(5), 873–886. doi:[10.1016/j.cell.2009.03.046](https://doi.org/10.1016/j.cell.2009.03.046)
- 622 Price, L. H., Kao, H.-T., Burgers, D. E., Carpenter, L. L., & Tyrka, A. R. (2013). Telomeres and Early-Life Stress:  
623 An Overview. *Biological Psychiatry*, 73(1), 15–23. doi:[10.1016/j.biopsych.2012.06.025](https://doi.org/10.1016/j.biopsych.2012.06.025)
- 624 Quinlan, A. R., & Hall, I. M. (2010). BEDTools: a flexible suite of utilities for comparing genomic features.  
625 *Bioinformatics*, 26(6), 841–842.
- 626 Romanov, M. N., Tuttle, E. M., Houck, M. L., Modi, W. S., Chemnick, L. G., Korody, M. L., ... Ryder, O. A.  
627 (2009). The value of avian genomics to the conservation of wildlife. *BMC Genomics*, 10(Suppl 2), S10.  
628 doi:[10.1186/1471-2164-10-S2-S10](https://doi.org/10.1186/1471-2164-10-S2-S10)
- 629 Romens, S. E., McDonald, J., Svaren, J., & Pollak, S. D. (2014). Associations Between Early Life Stress and Gene  
630 Methylation in Children. *Child Development*, 86(1), 303–309. doi:[10.1111/cdev.12270](https://doi.org/10.1111/cdev.12270)
- 631 Schrader, M., Jarrett, B. J. M., & Kilner, R. M. (2018). Parental care and sibling competition independently increase  
632 phenotypic variation among burying beetle siblings. *Evolution*, 0(ja). doi:[10.1111/evo.13607](https://doi.org/10.1111/evo.13607)
- 633 Schwander, T., Libbrecht, R., & Keller, L. (2014). Supergenes and Complex Phenotypes. *Current Biology*, 24(7),  
634 R288–R294. doi:[10.1016/j.cub.2014.01.056](https://doi.org/10.1016/j.cub.2014.01.056)
- 635 Sewall, K. B., Anderson, R. C., Soha, J. A., Peters, S., & Nowicki, S. (2018). Early life conditions that impact song  
636 learning in male zebra finches also impact neural and behavioral responses to song in females.  
637 *Developmental Neurobiology*, 78(8), 785–798. doi:[10.1002/dneu.22600](https://doi.org/10.1002/dneu.22600)
- 638 Shang, F., & Taylor, A. (2011). Ubiquitin–proteasome pathway and cellular responses to oxidative stress. *Free*  
639 *Radical Biology and Medicine*, 51(1), 5–16. doi:[10.1016/j.freeradbiomed.2011.03.031](https://doi.org/10.1016/j.freeradbiomed.2011.03.031)
- 640 Smith, J.N., Newhouse, D.J., Balakrishnan, C.N., Tuttle, E.M., R.A. Gonser. Differential morph gene expression in  
641 chromosome three of the white-throated sparrow (*Zonotrichia albicollis*). *In review*.
- 642 Sofaer, H. R., Sillett, T. S., Peluc, S. I., Morrison, S. A., & Ghalambor, C. K. (2013). Differential effects of food  
643 availability and nest predation risk on avian reproductive strategies. *Behavioral Ecology*, 24(3), 698–707.  
644 doi:[10.1093/beheco/ars212](https://doi.org/10.1093/beheco/ars212)
- 645 Spencer, K. A., Buchanan, K. L., Goldsmith, A. R., & Catchpole, C. K. (2003). Song as an honest signal of  
646 developmental stress in the zebra finch (*Taeniopygia guttata*). *Hormones and Behavior*, 44(2), 132–139.  
647 doi:[10.1016/S0018-506X\(03\)00124-7](https://doi.org/10.1016/S0018-506X(03)00124-7)
- 648 Spencer, Karen A. (2017). Developmental stress and social phenotypes: integrating neuroendocrine, behavioural and  
649 evolutionary perspectives. *Philosophical Transactions of the Royal Society B: Biological Sciences*,  
650 372(1727). Retrieved from <http://rstb.royalsocietypublishing.org/content/372/1727/20160242.abstract>
- 651 Spinney, L. H., Bentley, G. E., & Hau, M. (2006). Endocrine correlates of alternative phenotypes in the white-  
652 throated sparrow (*Zonotrichia albicollis*). *Hormones and Behavior*, 50(5), 762–771.  
653 doi:[10.1016/j.yhbeh.2006.06.034](https://doi.org/10.1016/j.yhbeh.2006.06.034)
- 654 Swett, M. B., & Breuner, C. W. (2009). Plasma Testosterone Correlates with Morph Type across Breeding Substages  
655 in Male White-Throated Sparrows. *Physiological and Biochemical Zoology*, 82(5), 572–579.  
656 doi:[10.1086/605392](https://doi.org/10.1086/605392)

- 657 Szyf, M. (2009). The early life environment and the epigenome. *Biochimica et Biophysica Acta (BBA) - General*  
658 *Subjects*, 1790(9), 878–885. doi:[10.1016/j.bbagen.2009.01.009](https://doi.org/10.1016/j.bbagen.2009.01.009)
- 659 Szyf, M., Weaver, I., & Meaney, M. (2007). Maternal care, the epigenome and phenotypic differences in behavior.  
660 *Reproductive Toxicology*, 24(1), 9–19. doi:[10.1016/j.reprotox.2007.05.001](https://doi.org/10.1016/j.reprotox.2007.05.001)
- 661 Thomas, J. W., Cáceres, M., Lowman, J. J., Morehouse, C. B., Short, M. E., Baldwin, E. L., ... Martin, C. L. (2008).  
662 The Chromosomal Polymorphism Linked to Variation in Social Behavior in the White-Throated Sparrow  
663 (*Zonotrichia albicollis*) Is a Complex Rearrangement and Suppressor of Recombination. *Genetics*, 179(3),  
664 1455–1468.
- 665 Thorneycroft, H B. (1966). Chromosomal Polymorphism in the White-Throated Sparrow, *Zonotrichia albicollis*  
666 (Gmelin). *Science*, 154(3756), 1571–1572.
- 667 Thorneycroft, H Bruce. (1975). A cytogenetic study of the white-throated sparrow, *Zonotrichia albicollis* (Gmelin).  
668 *Evolution*, 29(4), 611–621. doi:[10.1111/j.1558-5646.1975.tb00855.x](https://doi.org/10.1111/j.1558-5646.1975.tb00855.x)
- 669 Tomalty, K. M. H., Meek, M. H., Stephens, M. R., Rincón, G., Fangué, N. A., May, B. P., & Baerwald, M. R.  
670 (2015). Transcriptional Response to Acute Thermal Exposure in Juvenile Chinook Salmon Determined by  
671 RNAseq. *G3: Genes|Genomes|Genetics*, 5(7), 1335–1349.
- 672 Trivers, R.L. 1972. Parental investment and sexual selection. In: *Sexual Selection and the Descent of Man* (B.  
673 Campbell, ed), pp. 136–179. Aldine, Chicago, IL.
- 674 Turecki, G., & Meaney, M. J. (2016). Effects of the Social Environment and Stress on Glucocorticoid Receptor Gene  
675 Methylation: A Systematic Review. *Biological Psychiatry*, 79(2), 87–96.  
676 doi:[10.1016/j.biopsych.2014.11.022](https://doi.org/10.1016/j.biopsych.2014.11.022)
- 677 Turner, J. D., Schote, A. B., Macedo, J. A., Pelascini, L. P. L., & Muller, C. P. (2006). Tissue specific glucocorticoid  
678 receptor expression, a role for alternative first exon usage? *Biochemical Pharmacology*, 72(11), 1529–1537.  
679 doi:[10.1016/j.bcp.2006.07.005](https://doi.org/10.1016/j.bcp.2006.07.005)
- 680 Tuttle, E. M. (2003). Alternative reproductive strategies in the white-throated sparrow: behavioral and genetic  
681 evidence. *Behavioral Ecology*, 14(3), 425–432.
- 682 Tuttle, E. M., Grunst, A. S., Grunst, M. L., Korody, M. L., Betuel, A. M., Barcelo-Serra, M., ... Gonser, R. A.  
683 (2017). Climatically driven changes in population composition and offspring sex-morph ratio in a  
684 polymorphic species. *Ecosphere*, 8(4), e01762–e01762. doi:[10.1002/ecs2.1762](https://doi.org/10.1002/ecs2.1762)
- 685 Tuttle, E. M., Bergland, A. O., Korody, M. L., Brewer, M. S., Newhouse, D. J., Minx, P., ... Balakrishnan, C. N.  
686 (2016). Divergence and Functional Degradation of a Sex Chromosome-like Supergene. *Current Biology*,  
687 26(3), 344–350. doi:[10.1016/j.cub.2015.11.069](https://doi.org/10.1016/j.cub.2015.11.069)
- 688 Weaver, I. C. G., Cervoni, N., Champagne, F. A., D'Alessio, A. C., Sharma, S., Seckl, J. R., ... Meaney, M. J.  
689 (2004). Epigenetic programming by maternal behavior. *Nature Neuroscience*, 7, 847–847.
- 690 Weaver, I. C. G., Meaney, M. J., & Szyf, M. (2006). Maternal care effects on the hippocampal transcriptome and  
691 anxiety-mediated behaviors in the offspring that are reversible in adulthood. *Proceedings of the National*  
692 *Academy of Sciences of the United States of America*, 103(9), 3480–3485.
- 693 Wolf, J. B., & Wade, M. J. (2009). What are maternal effects (and what are they not)? *Philosophical Transactions of*  
694 *the Royal Society B: Biological Sciences*, 364(1520), 1107–1115. doi:[10.1098/rstb.2008.0238](https://doi.org/10.1098/rstb.2008.0238)
- 695 Yosef, R., Gombobaatar, S., & Bortolotti, G. R. (2013). Sibling Competition Induces Stress Independent of  
696 Nutritional Status in Broods of Upland Buzzards. *Journal of Raptor Research*, 47(2), 127–132.  
697 doi:[10.3356/JRR-12-14.1](https://doi.org/10.3356/JRR-12-14.1)
- 698 Zelko, I. N., Mariani, T. J., & Folz, R. J. (2002). Superoxide dismutase multigene family: a comparison of the CuZn-  
699 SOD (SOD1), Mn-SOD (SOD2), and EC-SOD (SOD3) gene structures, evolution, and expression. *Free*  
700 *Radical Biology and Medicine*, 33(3), 337–349. doi:[10.1016/S0891-5849\(02\)00905-X](https://doi.org/10.1016/S0891-5849(02)00905-X)
- 701 Zhang, B., & Steve, H. (2005). A General Framework for Weighted Gene Co-Expression Network Analysis.  
702 *Statistical Applications in Genetics and Molecular Biology*, 4. doi:[10.2202/1544-6115.1128](https://doi.org/10.2202/1544-6115.1128)
- 703 Zhao, H., Zhao, Y. G., Wang, X., Xu, L., Miao, L., Feng, D., ... Zhang, H. (2013). Mice deficient in *Epg5* exhibit  
704 selective neuronal vulnerability to degeneration. *The Journal of Cell Biology*, 200(6), 731 LP – 741.
- 705 Zinzow-Kramer, W. M., Horton, B. M., McKee, C. D., Michaud, J. M., Tharp, G. K., Thomas, J. W., ... Maney, D.  
706 L. (2015). Genes located in a chromosomal inversion are correlated with territorial song in white-throated  
707 sparrows. *Genes, Brain and Behavior*, 14(8), 641–654. doi:[10.1111/gbb.12252](https://doi.org/10.1111/gbb.12252)

708  
709

710 **Data Accessibility**

711           The 32 RNAseq libraries used in this study will be submitted to the NCBI Sequence Read  
712 Archive (SRA). All files needed to produce these results, including code and counts files, will be  
713 uploaded to this project's GitHub page: <https://github.com/danielnewhouse/wtsp>

714

715 **Author Contributions**

716           DJN designed and performed research, analyzed the data, and wrote the paper. MBS  
717 performed research, contributed samples, and reviewed drafts of the paper. EMT designed and  
718 performed research and contributed samples. RAG designed and performed research, contributed  
719 samples, and reviewed drafts of the paper. CNB designed and performed research, contributed  
720 reagents, and reviewed drafts of the paper.

721 **Tables and Figures**

722 Table 1. WGCNA modules correlated with morph, strength of correlation ( $R^2$ ), p-value, hub  
 723 gene(s) of module, and the degree distribution of hub gene(s).

| <b>Module</b> | <b><math>R^2</math></b> | <b>p-value</b>     | <b>Hub genes</b>                                                                                | <b>DD of hub gene(s)</b> |
|---------------|-------------------------|--------------------|-------------------------------------------------------------------------------------------------|--------------------------|
| Dark Red      | 0.47                    | 0.009              | TRAF5                                                                                           | 32                       |
| Light Cyan    | 0.67                    | $5 \times 10^{-5}$ | BPNT1, EPM2A, LOC102066536 (GST-like), MAN1A1, MEI4, RNASET2, SLC18B1, TTC32                    | >27                      |
| Salmon        | -0.5                    | 0.005              | NSL1                                                                                            | 39                       |
| Sky Blue      | 0.53                    | 0.003              | DTX3L, EIF2AK2, IFIT5, LOC102064521 (OASL), LOC102065196 (IFI27L2), PARP9, PARP14, RSAD2, ZNFX1 | >22                      |
| White         | -0.66                   | $9 \times 10^{-5}$ | GOPC, HDAC2, HINT3, TAF5L, TRMT61B, MARC2                                                       | >29                      |

724

725 Table 2. WGCNA modules correlated with pair type, strength of correlation ( $R^2$ ), p-value, hub  
 726 gene(s) of module, and the degree distribution of hub gene(s).

| <b>Module</b> | <b><math>R^2</math></b> | <b>p-value</b> | <b>Hub genes</b> | <b>DD of hub gene(s)</b> |
|---------------|-------------------------|----------------|------------------|--------------------------|
| Blue          | -0.45                   | 0.01           | NDUFB3           | 42                       |
| Cyan          | 0.46                    | 0.01           | HELZ             | 36                       |

|             |       |                    |                           |     |
|-------------|-------|--------------------|---------------------------|-----|
| Dark Orange | 0.7   | $1 \times 10^{-5}$ | NCOA6                     | 45  |
| Light Green | 0.6   | $4 \times 10^{-4}$ | CDK19, CHD4, EPG5         | >28 |
| Orange      | -0.45 | 0.01               | ZFX                       | 31  |
| Pink        | 0.37  | 0.04               | LOC102060916<br>(C12orf4) | 19  |
| Tan         | -0.61 | $3 \times 10^{-4}$ | DEPTOR                    | 39  |

727

# Module-trait relationships

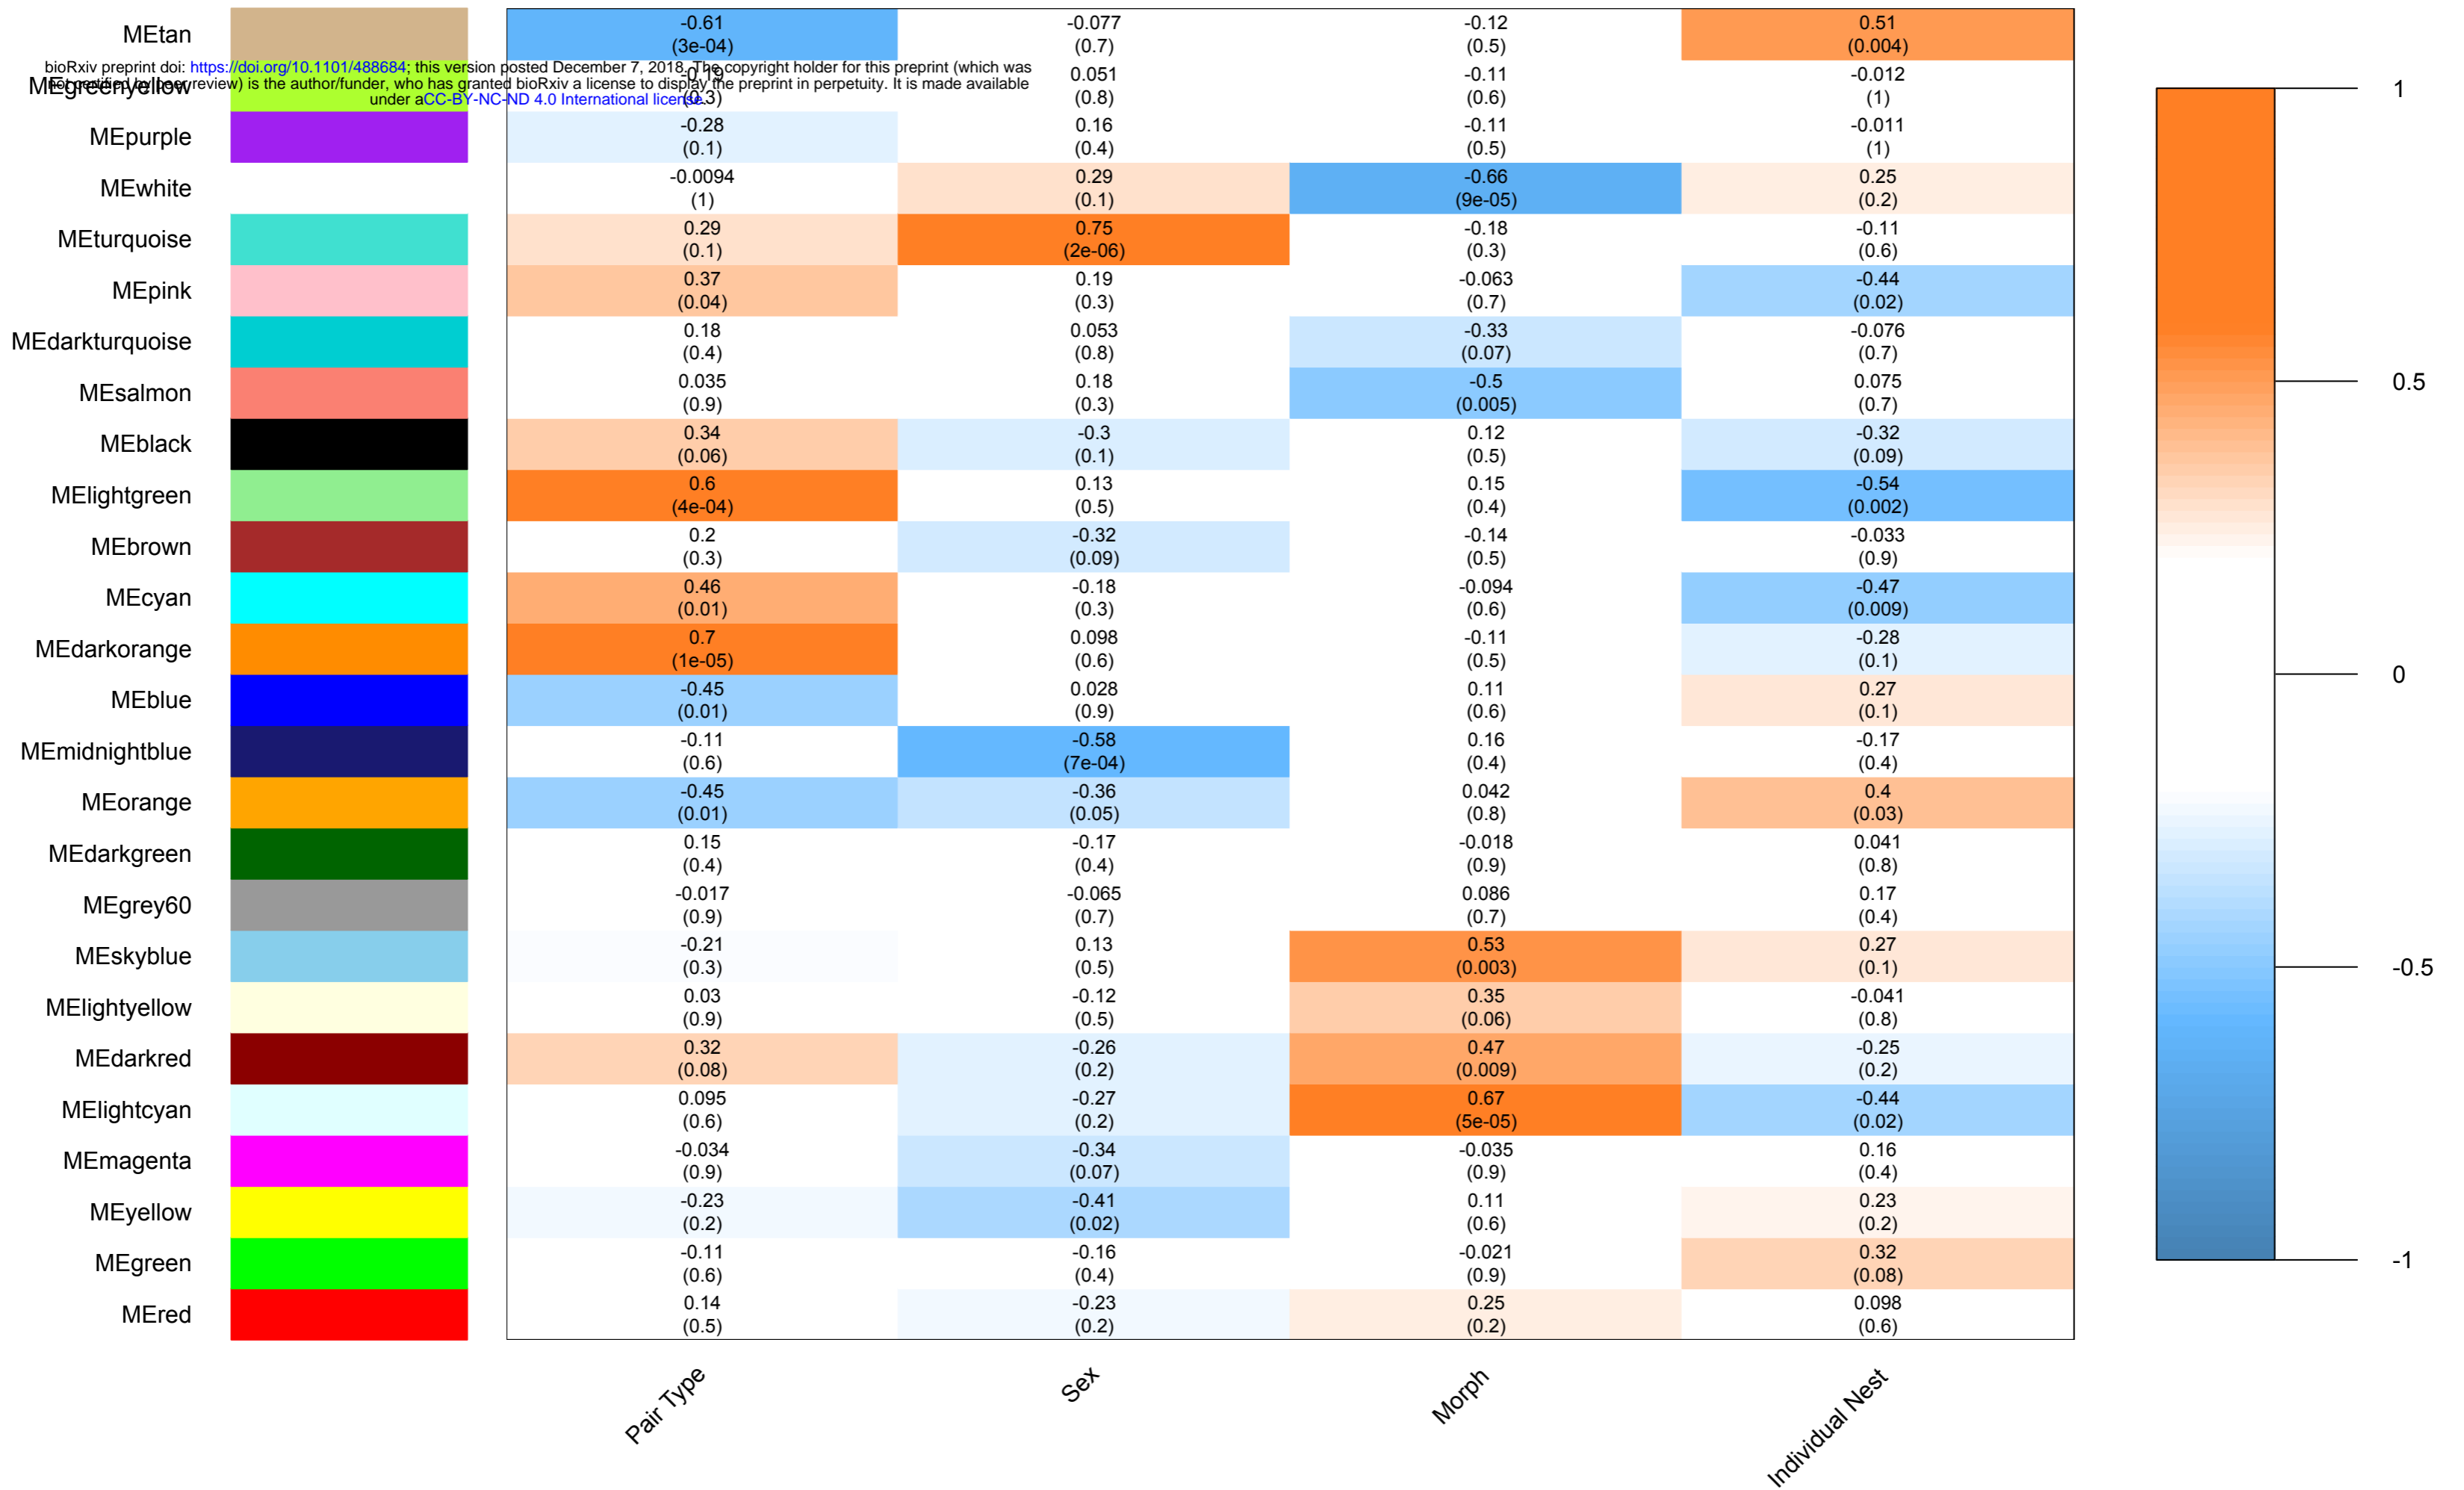

727 Figure 1. WGCNA module-trait correlation matrix. Each box contains the  $R^2$  correlation value  
728 followed by pvalue in parentheses of a given trait with the module. Correlation values range from  
729 -1 to 1, with orange colors representing positive correlation and blue colors representing negative  
730 correlation.

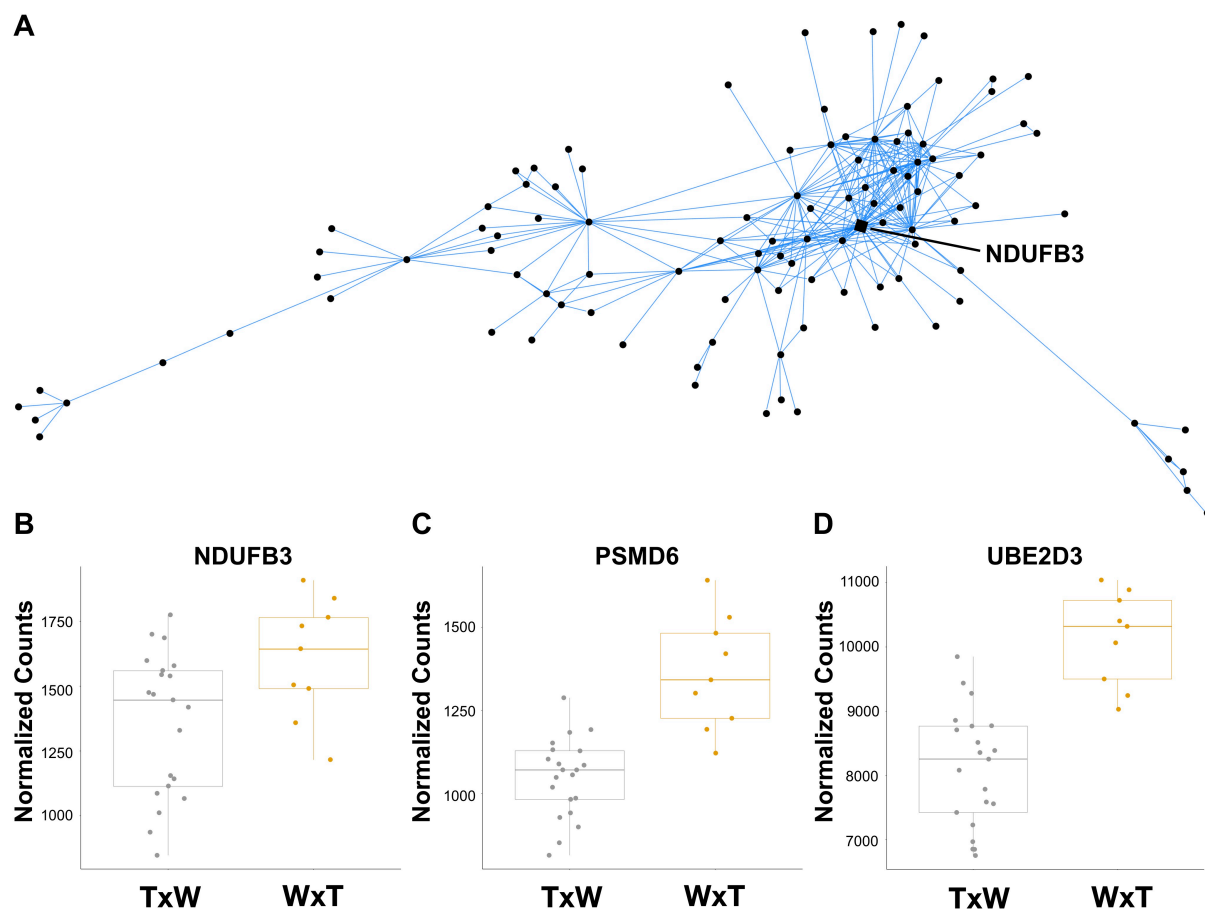

733  
734 Figure 2. (A) Network of blue module, highlighting hub gene NDUFB3, along with normalized  
735 expression plots of (B) NDUFB3, as well as ubiquitin-mediated proteolysis-related genes (C)  
736 PSMD6 and (D) UBE2D3. TxW = samples from nests sired by a T male and a W female. WxT =  
737 samples from nests sired by a white male and a tan female. Each circle represents a gene and  
738 diamonds represent hub genes described in Table 2.



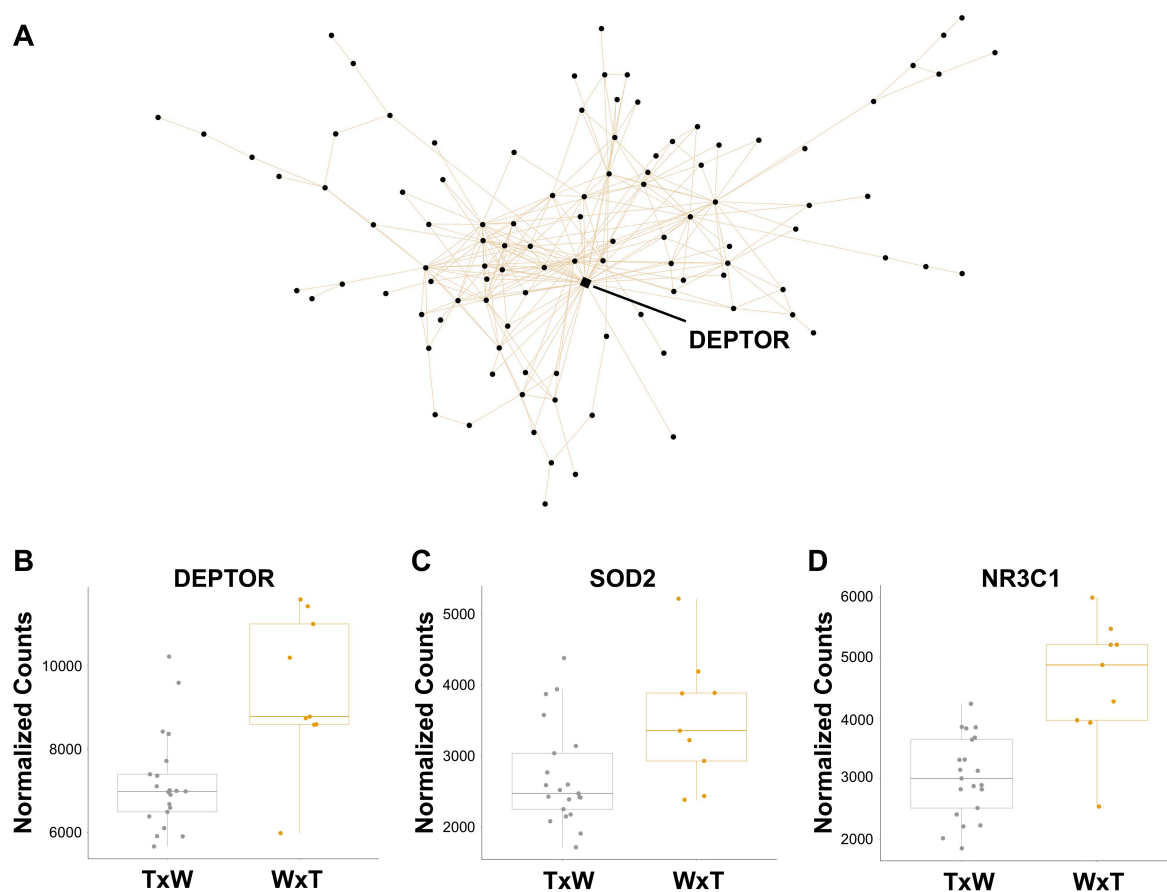

739  
740 Figure 3. (A) Network of tan module, highlighting hub gene DEPTOR, along with normalized  
741 expression plots of hub gene (B) DEPTOR, as well as stress responsive genes (C) SOD2 and (D)  
742 NR3C1. TxW = samples from nests sired by a tan male and a white female. WxT = samples from  
743 nests sired by a white male and a tan female.

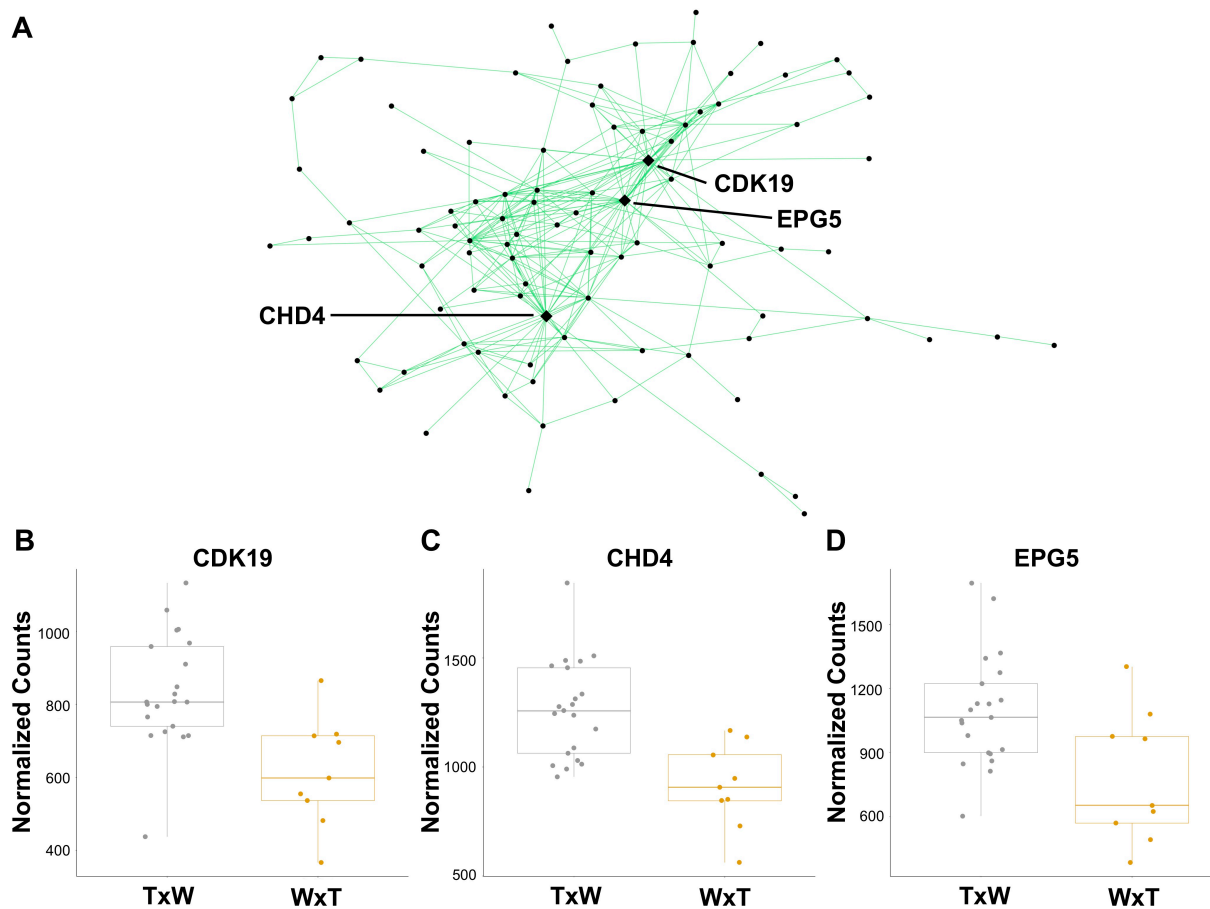

744  
745 Figure 4. (A) Network of light green module and normalized expression plots of hub genes (B)  
746 CDK19, (C) CHD4, and (D) EPG5. TxW represents samples from nests sired by a T male and a  
747 W female. WxT represent samples from nests sired by a white male and a tan female. Each circle  
748 represents a gene and diamonds represent hub genes described in Table 2.  
749
