1 **Title:** Parent and offspring genotypes influence gene expression in early life

2

3 **Running Title:** Parental effects on offspring gene expression

4

5 **Authors & Affiliations:**

6 Daniel J. Newhouse<sup>1\*</sup>, Margarida Barcelo-Serra<sup>2</sup>, Elaina M. Tuttle<sup>2</sup>, Rusty A. Gonser<sup>2</sup>,

7 Christopher N. Balakrishnan<sup>1</sup>

8

9 <sup>1</sup>East Carolina University, <sup>2</sup>Indiana State University

10 \*Corresponding Author

## 11 **Abstract**

12 Parents can have profound effects on offspring fitness. Little, however, is known about the  
13 mechanisms through which parental genetic variation influences offspring physiology in natural  
14 systems. White-throated sparrows (*Zonotrichia albicollis*, WTSP) exist in two genetic morphs,  
15 tan and white, controlled by a large polymorphic supergene. Morphs mate disassortatively,  
16 resulting in two pair types: tan male x white female (TxW) pairs, which provide biparental care  
17 and white male x tan female (WxT) pairs, which provide female-biased care. To investigate how  
18 parental composition impacts offspring, we performed RNA-seq on whole blood of WTSP  
19 nestlings sampled from nests of both pair types. Parental pair type had a large effect on nestling  
20 gene expression, with 881 genes differentially expressed (DE) and seven correlated gene co-  
21 expression modules. The DE genes and modules up-regulated in WxT nests with female-biased  
22 parental care primarily function in metabolism and stress-related pathways resulting from the  
23 overrepresentation of proteolysis and stress response genes (e.g. SOD2, NR3C1). These results  
24 show that parental genotypes and/or associated behaviors influence nestling physiology, and  
25 highlight avenues of further research investigating the ultimate implications for the maintenance  
26 of this polymorphism. Nestlings also exhibited morph-specific gene expression, with 92  
27 differentially expressed genes, comprising innate immunity genes and genes encompassed by the  
28 supergene. Remarkably, we identified the same regulatory hub genes in these blood-derived  
29 expression networks as were previously identified in adult WTSP brains (EPM2A, BPNT1,  
30 TAF5L). These hub genes were located within the supergene, highlighting the importance of this  
31 gene complex in structuring regulatory networks across diverse tissues.

32

## 33 **Keywords**

34 Transcriptome, parental effects, early life stress, nestling, RNAseq, ornithology

35

## 36 **Introduction**

37 Parents can have profound impacts on offspring development and fitness. Parental effects  
38 can manifest throughout the developmental period, both pre- and post-natally (reviewed in  
39 Meaney 2001, Lupien et al. 2009) and can be mediated through parental behaviors, genetics and  
40 physiology during early development (Trivers 1972). Parents play a substantial role in  
41 establishing the early life environment of offspring. For example in birds, parental decisions on  
42 nest placement, incubation behavior, and nest defense could strongly impact developmental  
43 conditions of the egg. These parental behaviors will impact exposure to sunlight, humidity,  
44 temperature, and other environmental impacts of the eggs, which can influence developmental  
45 physiology (e.g. Nord & Nilsson 2011). In addition to parental behaviors, prenatal effects often  
46 arise via physiological maternal effects. Developing offspring are susceptible to the maternally  
47 created environment (e.g. maternal hormones, immune state, nutrition), which influence  
48 offspring physiology (Mousseau & Fox 1998, Jacquin et al. 2012; reviewed in Gluckman et al.  
49 2008, Wolf & Wade 2009, Cottrell & Secki 2009).

50 The magnitude of parental effects, particularly in altricial species, is likely largest during  
51 the postnatal period, when offspring rely entirely on the parents for provisioning and growth  
52 (Royle et al. 2012). Provisioning plays a prominent role in offspring development, with the  
53 quality and quantity of food items crucial for offspring development (van Oers et al. 2015,  
54 Griebel et al. 2019). Similar to the prenatal stage, parental behaviors could also have strong  
55 impacts on offspring physiology. In many species, offspring are left alone during parental  
56 foraging trips, increasing environmental exposure (Lloyd and Martin 2004) and predation risk

57 (Lima 2009). Parental separation can also increase offspring anxiety (Millstein & Holmes 2007).  
58 Siblings must also compete to optimize provisioning, brooding warmth, and preening (Mock &  
59 Parker 1997). Thus, this postnatal environment, largely mediated through parental effects, can be  
60 a potential source of early life stress (ELS) in offspring, which may result in life-long fitness  
61 effects (reviewed in Monaghan 2014).

62 ELS has broad effects on organisms, including impaired neural development,  
63 neuroendocrine signaling, behavior, and physiology (McEwen 2007, Monaghan 2014). For  
64 example, ELS is associated with impaired neuroendocrine function and corresponding impaired  
65 hypothalamic-pituitary-adrenal (HPA) development, which leads to increase stress response  
66 sensitivity later in life (e.g. Heim et al. 2008, Spencer et al. 2009, Crespi et al. 2012, Spencer  
67 2017). ELS can exacerbate behavioral alterations as organisms develop and mature including  
68 symptoms of anxiety and depression in the postnatal environment (Noguera et al. 2017) and  
69 result in impaired behavior as reproductive adults (e.g. Krause et al. 2009, reviewed in Bolton et  
70 al. 2017). While the organismal effects of ELS are well studied, the genetic underpinnings are  
71 relatively underexplored. Much of the genetic work in the context of ELS has focused on gene  
72 regulatory impacts, particularly in mammalian biomedical models (reviewed in Szyf et al. 2007,  
73 Szyf 2009, Silberman et al. 2016, Alyamani & Murgatroyd 2018). In particular, the quality of  
74 parental care can have strong impacts on offspring health resulting from epigenetic modifications  
75 (Liu et al. 1997, Meaney 2001, Weaver et al. 2004). These gene regulation studies primarily use  
76 changes in DNA methylation as an indicator of ELS (Murgatroyd et al. 2009, Kinnally et al.  
77 2011, Lewis & Olive 2014) and recent work has expanded these approaches into non-mammalian  
78 organisms (e.g. Rubenstein et al. 2016, Moghadam et al. 2017, Pértille et al. 2017, Gott 2018,  
79 Sheldon et al. 2018). DNA methylation studies of ELS investigate changes to the structure of

80 DNA, but are often limited in the functional implications of ELS (i.e. transcription and  
81 translation). In general, these modifications are thought to alter transcriptional activity of genes  
82 in the modified genomic region (Berger 2007, Lowdon et al. 2016). Indeed, several studies have  
83 also taken candidate gene approaches to investigating gene expression in the context of ELS  
84 (Marco et al. 2014, Diaz-Real et al. 2017, Anastasiadi et al. 2018, Reshetnikov et al. 2018).  
85 However, very few studies assess genome-wide transcription under ELS (Moghadam et al.  
86 2017), particularly in the context of parental effects (but see: Weaver et al. 2006).

87 In this study, we examined the white-throated sparrow (*Zonotrichia albicollis*, WTSP) to  
88 assess the role of parental genotype on offspring gene expression. WTSPs exist in two plumage  
89 morphs, tan (T) and white (W), that are found in both sexes and in roughly equal frequencies  
90 (Lowther 1961). These morphs are genetically determined by alternative alleles of a supergene, a  
91 group of linked genes that are inherited together, show limited recombination, and maintain  
92 complex behavioral traits (i.e. WTSP morphs; Schwander et al. 2014, Taylor & Campagna 2016).  
93 The WTSP supergene resulted from a complex chromosomal rearrangement comprising multiple  
94 inversions (hereafter referred to as “inversion” or “inverted”). This inversion contains ~1,100  
95 genes on chromosome two, termed  $ZAL2^m$  (Throneycroft 1975, Thomas et al. 2008, Romanov et  
96 al. 2009, Tuttle et al. 2016). W morphs are nearly always heterozygous for the inversion  
97 ( $ZAL2/ZAL2^m$ ) and T morphs are always homozygous ( $ZAL2/ZAL2$ ; Thorneycroft 1966, 1975).

98 This unusual polymorphism in WTSPs influences hormonal profiles and the behavior of  
99 both sexes, and thus has the potential to influence pre- and post-natal environments for the  
100 offspring of different morphs. W morph males maintain higher levels of testosterone during the  
101 pre-laying, incubation, and brooding stages and oestradiol during the laying and brooding stages  
102 (Horton et al. 2014). Only oestradiol has been shown to differ between adult female morphs

103 during the breeding season and is higher in W morph females during the pre-laying and laying  
104 stages (Horton et al. 2014). These genetic and hormonal differences also translate into striking  
105 behavioral differences. W morphs, for example, are highly territorial and sing frequently whereas  
106 T morphs are far less territorial and aggressive (Lowther 1962, Kopachena & Falls 1993, Tuttle  
107 2003, Horton & Holberton 2010, Horton et al. 2014). More importantly from the perspective of  
108 offspring, males of each morph also differ in paternal investment (Knapton & Falls 1983, Horton  
109 et al. 2014). W morph males are promiscuous and provision nestlings very little. T morph males  
110 defend their within-pair paternity through mate guarding and are highly paternal. Females tend to  
111 provision at intermediate levels, but T morph females may compensate for unassisted care from  
112 W morph males and provision more than W morph females (Knapton & Falls 1983). A final  
113 wrinkle in this complex mating system is that morphs nearly always mate with the opposite  
114 morph (98.5%, Tuttle et al. 2016), resulting in two stable pair types: T male x W female (TxW)  
115 and W male x T female (WxT) (Lowther 1961, Tuttle 2003, Tuttle et al. 2016). Because males  
116 differ in paternal investment, this results in two distinct parental care strategies. TxW pairs  
117 provide biparental care and WxT pairs provide female-biased parental care. In this study we  
118 examined gene expression profiles of offspring from both pair-types in order to assess the  
119 physiological consequences of variation in parental genotype.

120

## 121 **Methods**

### 122 *Field based sample collection*

123 All nestling whole blood samples in this study came from a breeding population of  
124 WTSPs at the Cranberry Lake Biological Station in northern New York, USA (SUNY-ESF,  
125 44.15°N, 74.78°W) and were collected during the 2015 breeding season. We only utilized

126 samples collected during the first clutch (June 6 - June 14, 2015), as WTSP males may increase  
127 paternal investment in replacement broods (Horton et al. 2014). We collected ~80 $\mu$ L blood in  
128 capillary tubes via brachial venipuncture on days 5-7 post-hatch. Approximately 60 $\mu$ L blood was  
129 preserved in Longmire's lysis buffer (Longmire et al. 1992) for genotyping and ~20 $\mu$ L was  
130 immediately placed in RNAlater. Within six hours of collection, samples were placed  
131 temporarily into liquid nitrogen, before being shipped overnight on dry ice to -80°C storage until  
132 RNA extraction. All animal sampling protocols were approved by the Indiana State University  
133 Institutional Animal Care and Use Committee (IACUC 562158-1:ET/RG, 562192-1:ET/RG).

134

#### 135 *Molecular sexing & genotyping*

136 Nestling DNA was extracted from erythrocytes using the DNA IQ® magnetic extraction  
137 system (Promega Corp, Madison, WI USA). To determine sex and morph, we used PCR to  
138 fluorescently label and amplify a region of the chromo-helicase-DNA-binding gene, and a region  
139 of the vasoactive intestinal peptide following Griffiths et al. (1998) and Michopolous et al.  
140 (2007). The PCR products were run and analyzed on an ABI PRISM™ 310 genetic analyzer.

141

#### 142 *RNA extraction, library preparation, & sequencing*

143 We sampled a total of 52 nestlings for RNA extraction, but due to issues with RNA  
144 quality after extraction, only 32 were used for sequencing. These samples represent 23 nestlings  
145 from eight TxW pairs and nine nestlings from three WxT pairs. Additionally, these data represent  
146 18 females, 14 males, 15 T morph, and 17 W morph individuals.

147 We removed RNAlater and homogenized whole blood tissue samples with Tri-Reagent  
148 (Molecular Research Company). Total RNA was purified with a Qiagen RNeasy mini kit

149 (Valencia, CA, USA), followed by DNase treatment and further purification. We quality assessed  
150 RNA with an Agilent Bioanalyzer (RIN > 7) (Wilmington, DE, USA). Both library preparation  
151 and sequencing were performed at the University of Illinois Roy J. Carver Biotechnology Center.  
152 A library was prepared for each RNA sample using the Illumina HT TruSeq (San Diego, CA,  
153 USA) stranded RNA sample prep kit. Libraries were distributed into four pools with equimolar  
154 concentrations and quantitated via qPCR. Each of the pools was sequenced on an individual lane  
155 of an Illumina HiSeq 2500 using the Illumina TruSeq SBS sequencing kit v4 producing 100-  
156 nucleotide single-end reads.

157

#### 158 *Creation of masked reference genome*

159 The WTSP reference genome was generated from a male T morph individual (Tuttle et al.  
160 2016). Thus, the reference genome does not contain any sequence data from the ZAL2<sup>m</sup>  
161 inversion. To avoid any potential bias in mapping reads derived from W morph individuals onto  
162 a T morph genome, we generated a masked reference genome for this study. To do so, we used  
163 previously published whole genome sequences from three W morph adults (Tuttle et al. 2016).  
164 Reads were adapter trimmed with *Trim Galore!* v0.3.8  
165 (<https://github.com/FelixKrueger/TrimGalore>) and aligned to the WTSP reference genome with  
166 *bwa mem* v 0.7.10-r789 (Li 2013). We converted and sorted the resulting SAM alignment to  
167 BAM format with *samtools view* and *samtools sort*, respectively (*samtools* v1.2, Li et al. 2009).  
168 We then merged all genomic scaffolds corresponding to the ZAL2<sup>m</sup> inversion, as identified in  
169 Tuttle et al. (2016), with *samtools merge*. We called SNPs within the inversion using *samtools*  
170 *mpileup* and *bcftools call* v 1.2 (Li et al. 2009, Li 2011). We only kept SNPs that were  
171 heterozygous in each of the three individuals with *SnpSift* v 4.3p (Cingolani et al. 2012) and used



172 these SNPs to mask the reference genome with *bedtools maskfasta* v 2.21.0 (Quinlan & Hall  
173 2010).

174

175 *Quality control, read mapping, differential expression, & gene ontology*

176 We trimmed Illumina sequencing adapters from each of the 32 libraries with *Trim*  
177 *Galore!* v0.3.8 which uses *Cutadapt* v1.7.1 (Martin 2011). Trimmed reads were then mapped to  
178 the masked reference genome with *STAR* v2.5.3a (Dobin et al. 2013). The mapping results were  
179 then quantified and assigned gene IDs with *htseq-count* v0.6.0 (Anders et al. 2015) specifying ‘-s  
180 reverse’ and ‘-i gene’. We then removed lowly expressed genes by summing the counts for each  
181 gene across all 32 samples, dividing by 32 to obtain the study average, and removing genes with  
182 an average read count of < 5.

183 All statistical analyses were performed with R v3.5.0 (R Core Team 2013). We first  
184 identified outlier samples based on visual inspection of sample distance in a dendrogram within  
185 *WGCNA* (Horvath 2011). Two samples, one T female and one T male representing an entire  
186 TxW nest, were identified as outliers and removed from all future analyses (Figure S1). Using  
187 the remaining 30 samples, we normalized reads accounting for sequencing depth and assessed  
188 differential expression with *DEseq2* (Love et al. 2014). We performed variance stabilizing  
189 transformation of reads in *DEseq2* and performed PCA and hierarchical clustering based on  
190 Euclidean distance of gene expression profiles with *pcaExplorer* v2.6.0 (Marini & Binder 2016).  
191 Differential expression analyses utilized pairwise comparisons between nestling morph and pair  
192 type (i.e. parental morphs). We controlled for sex in morph comparisons and sex, morph, and  
193 nest ID for pair type comparisons. To include nest ID in the pair type comparison, we followed  
194 the “individuals nested within groups” guide in the *DEseq2* manual. We did not include nestling

195 age in analyses, as most samples were 6 days old (n=21), limiting comparisons with nestlings  
196 aged Day 5 (n=3) or Day 7 (n=6). Network analysis (see below) did not reveal any effect of age  
197 on variables of interest (morph, pair type; data not shown). We also tested for an interaction  
198 between nestling morph and pair type utilizing a grouping variable as outlined in the *DEseq2*  
199 manual. *DEseq2* determines differential expression with a Wald test followed by Benjamini &  
200 Hochberg (1995) FDR correction. Genes were considered differentially expressed (DE) if the  
201 FDR corrected p-value was < 0.10. Details for each model run, including the R code used, are in  
202 this project's GitHub repository.

203 We next tested for gene ontology (GO) enrichment among DE genes with *GOrilla* (Eden  
204 et al. 2007, 2009). For each *DEseq2* comparison, we ordered the list of genes based on ascending  
205 FDR values, excluding any genes in which *DEseq2* did not assign a FDR value. The WTSP  
206 genome is not completely annotated, so any loci without a gene symbol were excluded from GO  
207 analyses (n=1,926). *GOrilla* places greater weight on genes located at the top of the list (i.e. DE  
208 genes), while accounting for the contribution of each gene in the given comparison. GO  
209 categories were considered significantly enriched if the FDR corrected p-value < 0.05. *GOrilla*  
210 does not support WTSP annotation; so, all analyses were based on homology to human gene  
211 symbols.

212

### 213 *Weighted gene co-expression network analysis (WGCNA)*

214 We used the *WGCNA* package in R (Zhang & Horvath 2005, Langfelder & Horvath  
215 2008) to identify modules of co-expressed genes in our dataset. We first exported variance  
216 stabilizing transformed (vst) read counts from *DEseq2*, removed genes with an average vst < 5  
217 averaged across all 30 samples, and imported the subsequent list of 8,982 genes into *WGCNA*. To

218 build the co-expression matrix, we chose a soft thresholding power ( $\beta$ ) value of 12, at which the  
219 network reaches scale-free topology (Figure S2). We generated a signed network with minimum  
220 module size of 30 genes and merged highly correlated modules (dissimilarity threshold = 0.20,  
221 which corresponds to  $R^2 = 0.80$ ). We then correlated the eigengene, which is the first principal  
222 component of a module, of these merged modules with external traits (pair type, morph, sex, nest  
223 ID). Modules with  $p < 0.05$  were considered significantly correlated with a given trait. For all  
224 morph-specific results, we tested for an enrichment of inversion genes with a chi-squared test  
225 using a Fisher's exact test ( $p < 0.05$ ).

226 To visualize the interaction of genes within a module, we generated the intramodular  
227 connectivity (IM) score for each gene, which represents the interconnection of module genes. We  
228 exported all IM scores for modules of interest and imported into *VisAnt* v5.51 (Hu et al. 2013) for  
229 visualization. To maximize network clarity, we only plotted the top 300 interactions based on IM  
230 scores. Thus, we only visualized the most connected genes. To identify hub genes, we visualized  
231 the Degree Distribution (DD) for the network and selected the most connected genes above a  
232 natural break in the distribution. This resulted in one to nine hub genes per module.

233 To understand the biological function of modules correlated with traits of interest, we  
234 performed a target vs background GO analysis in *GOrilla*. For each module, we tested the  
235 assigned genes for each module against the entire list of 8,982 genes used for the *WGCNA*  
236 analysis. GO categories were significant with a FDR corrected p-value  $< 0.05$ .

237

## 238 **Results**

### 239 *Sequencing results*

240 We sequenced each sample to an average depth of 29.4 million reads (range = 16.2-58.5  
241 million reads). The 32 libraries were distributed into four pools in equimolar concentration. One  
242 pool contained only four samples, which corresponded to the four samples with lowest RNA  
243 concentrations. This pool was sequenced to an average depth of 56.17 million reads per library.  
244 The remaining three pools were sequenced to an average depth of 25.62 million reads per library.  
245 Samples mapped to our masked genome at an average rate of 91.08% (range = 88.19%-92.87%)  
246 (Table S1). A total of 8,982 genes had count values  $\geq 5$  across all samples, which included 641  
247 located in the W morph inversion. Samples did not segregate by pair type or morph in PCA or  
248 hierarchical clustering (Figures S3, S4).

249

#### 250 *Differential Expression – Morph*

251 Ninety-two genes were differentially expressed between morphs. Sixty-five of these  
252 genes (71%) were located in the inversion, representing a significant enrichment ( $\chi^2=553.73$ ,  
253  $df=1$ ,  $p<0.00001$ ) (Table S2). The inversion represents only 641 out the 8,892 genes (7%)  
254 sampled here. Additionally, expression of many of these 92 genes was elevated in W morph  
255 nestlings and a number of these genes had well-known functions in innate immunity (e.g. IFIT5,  
256 IL20RA, EIF2AK2, RSAD2). There was GO enrichment of four categories, two of which are  
257 immunity related: “immune response” ( $p = 0.019$ ) and “defense response to virus” ( $p = 0.049$ )  
258 (Table S3).

259

#### 260 *Differential Expression – Pair Type*

261 Pair type had the largest effect on gene expression, with 881 genes DE between offspring  
262 from the two different pair types ( $FDR < 0.10$ , Table S2). Many genes associated with stress

263 responses were elevated in nestlings in WxT nests, including the glucocorticoid receptor  
264 (NR3C1), superoxide dismutase (SOD)1 & SOD2, DEP domain-containing mTOR-interacting  
265 protein (DEPTOR), and several ubiquitin-mediated proteolysis pathway genes (e.g. UBE2D3,  
266 PSMD3, PSMD6). Additionally, several immune system related genes were also elevated in  
267 WxT nests, including cytokines (e.g. IL2RA, IL7R), suppressor of cytokine signaling 1 (SOCS1),  
268 and five putative major histocompatibility complex (MHC) class I loci. No GO categories were  
269 significantly enriched, however.

270 We next tested for a morph-specific response to pair type. Within WxT nests, 40 genes  
271 were DE ( $p < 0.10$ ) between T and W morph nestlings. Twelve of these genes (30%) are located  
272 within the inversion, again reflecting an enrichment of inversion genes among those differentially  
273 expressed between morph ( $\chi^2=34.44$ ,  $df=1$ ,  $p<0.00001$ ). Only two genes (THSD7B & CFAP44)  
274 were DE between morphs within TxW nests, both of which are uniquely DE between morphs in  
275 TxW nests. No GO categories were enriched in either comparison.

276

### 277 *WGCNA – Morph*

278 WGCNA revealed 26 modules, five of which were correlated with morph (Table 1,  
279 Figure 1). The light cyan module (183 genes,  $R^2=0.67$ ,  $p=5 \times 10^{-5}$ ) and ivory module (72 genes,  
280  $R^2=-0.66$ ,  $p=9 \times 10^{-5}$ ) contained genes elevated and suppressed, respectively, in W morph  
281 nestlings relative to T morph nestlings. These modules are both enriched for genes located within  
282 the chromosomal inversion (light cyan module = 70/183 (38%) genes,  $\chi^2=266.49$ ,  $df=1$ ,  
283  $p<0.00001$ ; ivory module = 40/72 (56%),  $\chi^2=261.60$ ,  $df=1$ ,  $p<0.00001$ ) (Figure S5). The hubs of  
284 each of these modules are also located in the chromosomal inversion (Table 1, Figure S5).

285 Additionally, the sky blue module (58 genes,  $R^2=0.53$ ,  $p=0.003$ ) and dark red module (102 genes,

286  $R^2=0.47$ ,  $p=0.009$ ) (Figure S6) contained genes elevated in W morph nestlings and many of these  
287 genes overlap with the immune related genes described in the morph DE tests above. The hubs of  
288 these networks (e.g. sky blue: EIF2AK2, IFIT5, OASL; dark red: TRAF5) (Table 1) reflect a  
289 conserved innate immunity network structure in avian blood (Kernbach et al., in review) (Figure  
290 S6).

291

### 292 *WGCNA – Pair Type*

293 We found seven modules correlated with pair type (Table 2, Figure 1). The blue module  
294 represented genes that are elevated in nestlings from WxT nests (1,142 genes,  $R^2 = -0.45$ ,  
295  $p=0.01$ ). This module contained both the largest number of genes and correspondingly strongest  
296 functional enrichment. Many of these GO enrichments were related to protein function, resulting  
297 from the presence of ribosomal genes. Interestingly, several GO categories for metabolism,  
298 catabolism, and proteolysis were also enriched, driven by genes encoding ubiquitin-conjugating  
299 enzymes and proteasome subunits (e.g. “proteasomal protein catabolic process”,  $p=2.34 \times 10^{-4}$ ;  
300 “proteasome-mediated ubiquitin-dependent protein catabolic process”,  $p=5.32 \times 10^{-4}$ ) (Table S4).  
301 Many of these (e.g. PSMF1, PSMD3, PSMD6, UBE2D2, UBE2D3, UBE3C) were also DE  
302 between offspring of the two pair types (Figure 2). Lastly, the blue module contains one hub  
303 gene, NDUFB3 (DD=42) (Figure 2), which is involved in the mitochondrial electron transport  
304 chain.

305 The beige and light green modules represented candidate stress response networks. These  
306 modules showed contrasting expression patterns in nestlings from WxT nests (Figures 4 & 5).  
307 Although not significantly enriched for any GO categories, the beige module comprised 335  
308 genes that were upregulated in WxT nests relative to TxW nests ( $R^2=-0.61$ ,  $p=3 \times 10^{-4}$ ). DEPTOR,

309 which functions as an inhibitor of the mTOR pathway in response to stress (e.g. Desantis et al.  
310 2015), was the single hub in the beige module (DD=39, Figure 3). The beige module also  
311 contained NR3C1, which is activated in response to increased glucocorticoid secretion. Lastly,  
312 the light green module (116 genes,  $R^2=0.60$ ,  $p=4 \times 10^{-4}$ ) contained genes with low expression in  
313 TxW nests relative to WxT nests. There were three hub genes (DD > 28), CDK19, CHD4, and  
314 EPG5, each with previously described roles in the stress response (Figure 4).

315 For each pair type module, the correlation was stronger for the overall effect of pair type  
316 than any individual nest, indicating that one nest did not drive the correlation. This trend was  
317 reflected in gene expression plots of hub genes and candidate genes described above (Figure S7).  
318 We did not observe modules correlated with pair type that were also correlated with nestling  
319 morph or sex, suggesting there is no morph or sex-specific response to a given pair type at the  
320 network level.

321

## 322 **Discussion**

323 By assessing genome-wide transcription in nestlings raised by different WTSP pair types we  
324 have identified distinct transcriptomic signatures that suggest WxT pairs induce a stress response  
325 in developing nestlings relative to TxW pairs. This is reflected both by differential expression of  
326 several genes involved in protein degradation as well as networks of co-expressed genes with  
327 stress response hubs. Additionally, we identified morph-specific gene expression driven by  
328 innate immunity genes and genes located in the chromosome 2 inversion. As adults, the genes  
329 within the inversion strongly influence the WTSP neural transcriptome (Balakrishnan et al. 2014,  
330 Zinzow-Kramer et al. 2015). Our results here suggest that as nestlings, parental genotypes and

331 associated behaviors, rather than nestling genotype, have the strongest influence on the nestling  
332 transcriptome.

333

#### 334 *Gene expression differences resulting from pair type*

335 We find 881 genes DE between nestlings raised under the two pair types. Many of these  
336 genes function in the proteasome or ubiquitin-mediated proteolysis. Cells naturally use the  
337 proteasome for degradation of proteins targeted by the ubiquitination process, but genes involved  
338 in proteasome formation (e.g. PSMD6, PSMD11) and ubiquitination (e.g. UBE2B) are up-  
339 regulated in cells experiencing mild oxidative stress (Aiken et al. 2011, Shang & Taylor 2011,  
340 Livneh et al. 2016) or organisms experiencing abiotic stress (Dhanasiri et al. 2013, Tomalty et al.  
341 2015). Thus, increased expression of these genes in nestlings from WxT nests suggests they are  
342 responding to oxidative stress. As a result, there may be a cost to having a W morph father and T  
343 morph mother at the nestling stage.

344 To complement our differential expression approach, we also constructed co-expression  
345 networks with *WGCNA*. *WGCNA* identifies modules of co-regulated genes blind to the  
346 experimental design. These modules are then correlated with external traits, offering a systems-  
347 level view into how conditions impact transcriptional networks. Within these networks, we can  
348 then perform GO analyses as described above and identify network hubs, which are the most  
349 highly connected genes within that network. Using this approach, we identified 26 modules of  
350 co-regulated genes in this dataset (Figure 1), seven of which were significantly correlated with  
351 parental pair type. The blue module contains genes that are elevated in nestlings in WxT nests.  
352 The blue module hub gene was *NDUFB3* (Module Membership [MM]=0.938, DD=42) (Figure  
353 2), which encodes a subunit of the mitochondrial membrane respiratory chain. Interestingly,



354 many of the same proteolysis-related genes highlighted in the differential expression results are  
355 also present in this module, resulting in the enrichment of several metabolism and stress-related  
356 GO categories (Table S4).

357 Two modules, light green and beige, contained stress responsive hub genes. The light  
358 green module contains genes that are suppressed in nestlings in WxT nests, with three hub genes:  
359 CDK19, CHD4, and EPG5 (Figure 4). The absence of EPG5 expression (via knockout) and  
360 reduction in CHD4 expression (via knockdown) has been associated with increased DNA  
361 damage (Zhao et al. 2013, Larsen et al. 2010). Similarly, down-regulation of CDK19 following  
362 knockdown is associated with an increased stress response (Audetat et al. 2017). Suppression of  
363 these genes in these nestlings could be indicative of increased cellular damage. The beige module  
364 contains genes whose expression is elevated in nestlings from WxT nests and contains one hub  
365 gene, DEPTOR, which is an inhibitor of mTOR signaling (Figure 3). The exact role of DEPTOR  
366 remains unclear, but up-regulation likely inhibits the mTORC1 pathway to reduce endoplasmic  
367 reticulum stress, promote cell survival, and avoid apoptosis (Peterson et al. 2009, Desantis et al.  
368 2015, Catena et al. 2016).

369 Increased expression of genes in the beige module in these nestlings and the high  
370 connectivity of DEPTOR to other co-expressed genes provide further support for a  
371 transcriptional stress response within WxT nests. The beige module also contains two well-  
372 studied stress responsive genes, superoxide dismutase 2 (SOD2) and the glucocorticoid receptor  
373 (NR3C1). SOD2 mitigates the effects of exposure to reactive oxygen species by scavenging free  
374 radicals (Zelko et al. 2002). NR3C1 binds glucocorticoids and has primarily been studied in the  
375 context of ELS and methylation of an upstream promoter. NRC3C1 methylation is often  
376 associated with down-regulation of NR3C1 (e.g. McGowan et al. 2009) and impairment of the

377 HPA axis, but up-regulation following methylation has also been observed as part of the stress  
378 response (Turner et al. 2006, Bockmühl et al. 2015). Increased expression observed here directly  
379 implicates the HPA axis and suggests these nestlings may be activating SOD2 and NR3C1 to  
380 cope with elevated levels of reactive oxygen species and corticosterone, respectively (Wang et al.  
381 2018, Finsterwald & Alberini 2014). However, further work is needed to investigate stress  
382 physiology, corticosterone levels, and uncover the epigenetic state of NR3C1 in these nestlings  
383 and how this may relate to ELS (Banerjee et al. 2011, McCoy et al. 2016, Rubenstein et al. 2016,  
384 Quirici et al. 2016, Greggor et al. 2017).

385

386 *How does parental genotype influence offspring gene expression?*

387 In a non-experimental study, we have limited power to make inferences about the  
388 mechanism by which parental genotype impacted offspring gene expression. Given the well-  
389 studied reproductive biology of WTSPs, however, two mechanisms seem especially likely:  
390 hormone-mediated maternal effects and/or differences in parental provisioning. In weighing the  
391 evidence for these two non-mutually exclusive possibilities, we conclude that the difference in  
392 parental provisioning is the most plausible explanation for the observed gene expression  
393 differences. As described above, WTSP morphs differ in hormone levels. Only oestradiol,  
394 however, has been shown to differ between adult female morphs during the breeding season and  
395 is higher in W morph females during the pre-laying and laying stages (Horton et al. 2014). No  
396 baseline differences in any other hormone measured to date (corticosterone, testosterone, DHEA,  
397 DHT) have been described during the breeding season (Spinney et al. 2006, Swett & Breuner  
398 2009, Horton & Holberton 2010, Horton et al. 2014). Taken together this suggests that hormone  
399 deposition into eggs may not differ dramatically between the morphs. By contrast, there is strong

400 evidence of differences in provisioning among morph types (Knapton & Falls 1983, Kopachna &  
401 Falls 1993, Horton & Holberton 2010, Horton et al. 2014). Reduced provisioning by W morph  
402 males appears to be stable across populations resulting in female-biased parental care in WxT  
403 nests (Knapton & Falls 1983, Horton et al. 2014). Therefore, parental care variation is a likely  
404 source of behaviorally mediated maternal or paternal effects (see Crean & Bonduriansky 2014)  
405 that would explain the strong signature of stress exposure in the expression data.

406         Previous work revealed no difference in clutch size between pair types (Knapton et al.  
407 1984, Formica et al. 2004) and no effect of pair type on nestling mass (Knapton et al. 1984,  
408 Tuttle et al. 2017). Also, nestlings did not differ in mass at time of sampling between the TxW  
409 and WxT nests used in this study (Smith et al. in review). Increased provisioning by females to  
410 compensate for reduced care by males could explain this observation, and this has been observed  
411 previously in a separate WTSP population (Knapton & Falls 1983). In this scenario reduced  
412 brooding and increased maternal separation could also negatively impact nestling physiology and  
413 act as a source of ELS (reviewed in Ledón-Rettig et al. 2013). Somewhat surprisingly, given the  
414 gene expression findings described here, a recent study in our study population did not detect  
415 differences in reactive oxygen metabolites in plasma of offspring of the two different pair types  
416 (Grunst et al. 2019). ROM, however, only provides a limited overview of the stress response and  
417 the RNA-seq response we observed could even mitigate long-term consequences of ELS. The  
418 results here further highlight the utility of blood RNA-seq as a highly sensitive measure of  
419 environmental exposures (Louder et al. 2018).

420         Our study was carried out in the field as part of a long-term study and is limited by the  
421 fact that we did not perform a cross-fostering experiment. We aimed to mitigate potential  
422 environmental confounds by restricting sampling of nestlings to a short time period of nine days.

423 Certainly the environment may influence gene expression in our samples, but consistent changes  
424 among the samples in the two pair types suggest the role of parents is a significant driver of  
425 nestling gene expression, rather than temporal or spatial environmental variation.

426

#### 427 *Morph-specific gene expression*

428 We were also interested in morph-specific gene expression and how nestling morph may  
429 respond to differences in parental pair type. WTSPs have been studied extensively as adults, but  
430 very rarely in other life stages. W morph males and T morph females exhibit earlier reproductive  
431 and actuarial senescence, potentially resulting from the high energy expenditure lifestyle of W  
432 morph males and biased parental care given by T morph females (Grunst et al. 2018a, Grunst et  
433 al. 2018b). There also appears to be seasonal variation in fitness between the morphs as adults.  
434 Following cold, wet winters, W morph males exhibit lower recruitment in the breeding grounds,  
435 leading to an overproduction of W morph male nestlings, potentially to stabilize morph  
436 frequencies in the population (Tuttle et al. 2017). Thus, morph specific differences may arise in  
437 early life. We found 92 genes DE between morphs, including many innate immune-related genes  
438 and genes located within the inversion (65/92 genes, Table S2). *WGCNA* revealed five modules  
439 correlated with morph (Figure 1). These included two innate immunity-related modules with  
440 increased expression in W morphs (Dark Red & Sky Blue) and two modules enriched with genes  
441 located in the inversion (Ivory = 40/72, Light Cyan = 70/183) (Figures S5, S6). The sky blue  
442 module contains nine hub genes and the dark red module contains one hub gene, both of which  
443 include well-studied anti-viral genes (e.g. sky blue: OASL, RSAD2; dark red: TRAF5). These  
444 genes also form a co-expression module in avian blood following West Nile virus infection  
445 (Kernbach et al., in review). Adult WTSP morphs differ in their ability to clear infection (Boyd et

446 al. 2018), so the immune activation here may be indicative of an increased parasite load in W  
447 morph nestlings, although further investigation is required. The light cyan module contains genes  
448 elevated in W morph nestlings and contains eight hub genes, each located in the inversion (Table  
449 1). Three of these, EPM2A, BPNT1, and TAF5L, were also identified as hub genes in brain  
450 tissues of adult W morph males (Zinzow-Kramer et al. 2015). These nestlings thus exhibit  
451 expression differences in inversion genes prior to any phenotypic or behavioral differences,  
452 revealing the importance of the inversion in maintaining morph phenotypes throughout life.  
453 Additionally, the conservation of network hub genes in a different tissue and life stage highlights  
454 avenues for further investigation into WTSP gene regulation.

455         Despite broad gene expression differences between the morphs, within pair types morph-  
456 specific expression was limited. In part due to small sample size, nestlings in TxW nests only  
457 have two genes DE between morphs. There is a larger effect of morph within WxT nests, where  
458 the number of DE genes increased to 40. These genes encompassed a wide range of gene  
459 functions without any obvious stress-related candidate genes. Of these 40 genes, 34 are uniquely  
460 DE within WxT nests and do not overlap with the overall list of 92 genes DE between morphs  
461 using all samples. Interestingly, glucocorticoid-induced transcript 1 (GLCCI1) is elevated in W  
462 morph nestlings in WxT nests. The function of GLCCI1 remains unclear (Kim et al. 2016), but  
463 expression differences between morphs observed here implicates the role of glucocorticoids in  
464 response to pair type. This suggests that nestling morphs may respond differently to the parental  
465 pair type though larger sample sizes will be needed to explore this further.

466

467 **Conclusions**

468           Using the WTSP, a system with alternative parental care strategies, we show that  
469 nestlings in WxT nests (female-biased parental care) have increased expression of stress-related  
470 genes, and parental genotypes may act as a source of ELS in the species. Nestling morph also  
471 influences transcription, but parental pair type appears to have the greatest effect on their  
472 transcriptome. Combined, this supports the parental effects hypothesis (Wade 1998, Schrader et  
473 al. 2018), where offspring phenotypes are primarily a result of the nest environment and care  
474 received, rather than from offspring genotypes (i.e. T vs. W). Nearly 54% of observed pairs have  
475 been WxT (Tuttle et al. 2016). Thus, roughly half of the nestlings in every population will  
476 experience female-biased parental care. Our results suggest that these differences in parental pair  
477 type have at least short-term consequences on offspring physiology. While we have identified  
478 impacts at the level of transcription, an integrative approach assessing nestling WTSP physiology  
479 and performing cross-fostering experiments will further elucidate the consequences of variation  
480 in parental pair type. Importantly, it remains unclear whether female-biased parental care or  
481 differences in maternal effects translate into long-term fitness consequences for offspring. There  
482 appears to be a cost associated with parental genotype, as less cooperative reproductive strategy  
483 (WxT pairs) accelerates senescence (Grunst et al. 2018a, Grunst et al. 2018b). We show here that  
484 this cost is also translated into nestlings within WxT nests via increased stress-related gene  
485 expression. This work sets the stage to further explore morph-specific fitness consequences in  
486 nestlings experiencing alternative parental care strategies.

487

#### 488 **Acknowledgements**

489 We acknowledge Lindsay Forrette, Andrea Grunst, and Melissa Grunst for assistance in the field,  
490 Sarah Ford for assistance with molecular work, Rachel Wright for WGCNA code, and Cranberry

491 Lake Biological Station. Funding provided by East Carolina University, Indiana State University,  
492 The National Science Foundation (grant no. DUE-0934648) and the National Institutes of Health  
493 (grant no. 1R01Gm084229 to E.M.T and R.A.G.) and a Sigma Xi Grants in Aid of Research  
494 award to DJN. Birds were banded with color bands and a Fish and Wildlife band (Master  
495 Banding Permit 22296 to EMT and permit 24105 to RAG). Dr. Alvaro Hernandez and Chris  
496 Wright provided guidance and oversight on sequencing carried out at the University of Illinois.  
497 All methods were conducted in accordance with legal and ethical standards and were approved  
498 by Indiana State University's Institutional Animal Care and Use Committee (protocols 562158-  
499 1:ET/RG and 562192-1:ET/RG).

- 500  
501 **References**  
502 Aiken, C. T., Kaake, R. M., Wang, X., & Huang, L. (2011). Oxidative Stress-Mediated Regulation of Proteasome  
503 Complexes. *Molecular & Cellular Proteomics*, 10(5). Retrieved from  
504 <http://www.mcponline.org/content/10/5/R110.006924.abstract>  
505 Alyamani, R. A. S., & Murgatroyd, C. (2018). Epigenetic Programming by Early-Life Stress. In *Progress in*  
506 *Molecular Biology and Translational Science* (Vol. 157, pp. 133–150). doi: [10.1016/bs.pmbts.2018.01.004](https://doi.org/10.1016/bs.pmbts.2018.01.004)  
507 Anastasiadi, D., Esteve-Codina, A., & Piferrer, F. (2018). Consistent inverse correlation between DNA methylation  
508 of the first intron and gene expression across tissues and species. *Epigenetics & Chromatin*, 11(1). doi:  
509 [10.1186/s13072-018-0205-1](https://doi.org/10.1186/s13072-018-0205-1)  
510 Anders, S., Pyl, P. T., & Huber, W. (2015). HTSeq-A Python framework to work with high-throughput sequencing  
511 data. *Bioinformatics*, 31(2), 166–169. doi: [10.1093/bioinformatics/btu638](https://doi.org/10.1093/bioinformatics/btu638)  
512 Audetat, K. A., Galbraith, M. D., Odell, A. T., Lee, T., Pandey, A., Espinosa, J. M., ... Taatjes, D. J. (2017). A  
513 kinase-independent role for CDK19 in p53 response. *Molecular and Cellular Biology*. 37(13), e00626-16  
514 Retrieved from <http://mcb.asm.org/content/early/2017/04/12/MCB.00626-16.abstract>  
515 Balakrishnan, C. N., Mukai, M., Gonser, R. A., Wingfield, J. C., London, S. E., Tuttle, E. M., & Clayton, D. F.  
516 (2014). Brain transcriptome sequencing and assembly of three songbird model systems for the study of  
517 social behavior. *PeerJ*, 2, e396–e396. doi: [10.7717/peerj.396](https://doi.org/10.7717/peerj.396)  
518 Banerjee, S. B., Arterbery, A. S., Fergus, D. J., & Adkins-Regan, E. (2011). Deprivation of maternal care has long-  
519 lasting consequences for the hypothalamic-pituitary-adrenal axis of zebra finches. *Proceedings of the Royal*  
520 *Society B: Biological Sciences*, 279(1729), 759–766. doi: [10.1098/rspb.2011.1265](https://doi.org/10.1098/rspb.2011.1265)  
521 Benjamini, Y., & Hochberg, Y. (1995). Controlling the false discovery rate - a practical and powerful approach to  
522 multiple testing. *J R Stat Soc B Method*, 57(1), 289-300.  
523 Berger, S. L. (2007). The complex language of chromatin regulation during transcription. *Nature*, 447(7143), 407–  
524 412. doi: [10.1038/nature05915](https://doi.org/10.1038/nature05915)  
525 Bockmühl, Y., Patchev, A. V., Madejska, A., Hoffmann, A., Sousa, J. C., Sousa, N., ... Spengler, D. (2015).  
526 Methylation at the CpG island shore region upregulates Nr3c1 promoter activity after early-life stress.  
527 *Epigenetics*, 10(3), 247–257. doi: [10.1080/15592294.2015.1017199](https://doi.org/10.1080/15592294.2015.1017199)  
528 Bolton, J. L., Molet, J., Ivy, A., & Baram, T. Z. (2017). New insights into early-life stress and behavioral outcomes.  
529 *Current Opinion in Behavioral Sciences*, 14, 133–139. doi: [10.1016/j.cobeha.2016.12.012](https://doi.org/10.1016/j.cobeha.2016.12.012)

- 530 Boyd, R. J., Kelly, T. R., MacDougall-Shackleton, S. A., & MacDougall-Shackleton, E. A. (2018). Alternative  
531 reproductive strategies in white-throated sparrows are associated with differences in parasite load following  
532 experimental infection. *Biology letters*, *14*(7), 20180194.
- 533 Catena, V., Bruno, T., De Nicola, F., Goeman, F., Pallocca, M., Iezzi, S., ... Fanciulli, M. (2016). Deptor  
534 transcriptionally regulates endoplasmic reticulum homeostasis in multiple myeloma cells. *Oncotarget*,  
535 *7*(43), 70546–70558. doi: [10.18632/oncotarget.12060](https://doi.org/10.18632/oncotarget.12060)
- 536 Cingolani, P., Patel, V., Coon, M., Nguyen, T., Land, S., Ruden, D., & Lu, X. (2012). Using *Drosophila*  
537 *melanogaster* as a Model for Genotoxic Chemical Mutational Studies with a New Program, SnpSift.  
538 *Frontiers in Genetics*, *3*, 35–35.
- 539 Cottrell, E. C., & Secki, J. R. (2009). Prenatal stress, glucocorticoids and the programming of adult disease.  
540 *Frontiers in Behavioral Neuroscience*, *3*, 19. doi: [10.3389/neuro.08.019.2009](https://doi.org/10.3389/neuro.08.019.2009)
- 541 Crean, A. J., & Bonduriansky, R. (2014). What is a paternal effect? *Trends in Ecology & Evolution*, *29*(10), 554–  
542 559. doi: [10.1016/j.tree.2014.07.009](https://doi.org/10.1016/j.tree.2014.07.009)
- 543 Crespi, E. J., Williams, T. D., Jessop, T. S., & Delehanty, B. (2012). Life history and the ecology of stress: how do  
544 glucocorticoid hormones influence life-history variation in animals? *Functional Ecology*, *27*(1), 93–106.  
545 doi: [10.1111/1365-2435.12009](https://doi.org/10.1111/1365-2435.12009)
- 546 Desantis, A., Bruno, T., Catena, V., De Nicola, F., Goeman, F., Iezzi, S., ... Fanciulli, M. (2015). Chemically induced  
547 inhibition of mTOR pathway enables stress-induced autophagy. *The EMBO Journal*, *34*(9), 1214–1230.
- 548 Dhanasiri, A. K. S., Fernandes, J. M. O., & Kiron, V. (2013). Liver Transcriptome Changes in Zebrafish during  
549 Acclimation to Transport-Associated Stress. *PLOS ONE*, *8*(6), e65028–e65028.
- 550 Diaz-Real, J., Kim, S.-Y., & Velando, A. (2017). Plumage colour and the expression of stress-related genes in gull  
551 chicks. *Journal of Avian Biology*, *48*(9), 1216–1225. doi: [10.1111/jav.01460](https://doi.org/10.1111/jav.01460)
- 552 Dobin, A., Davis, C. A., Schlesinger, F., Drenkow, J., Zaleski, C., Jha, S., ... Gingeras, T. R. (2013). STAR: ultrafast  
553 universal RNA-seq aligner. *Bioinformatics*, *29*(1), 15–21.
- 554 Eden, E., Lipson, D., Yogev, S., & Yakhini, Z. (2007). Discovering Motifs in Ranked Lists of DNA Sequences.  
555 *PLOS Computational Biology*, *3*(3), e39–e39.
- 556 Eden, E., Navon, R., Steinfeld, I., Lipson, D., & Yakhini, Z. (2009). GOrilla: a tool for discovery and visualization  
557 of enriched GO terms in ranked gene lists. *BMC Bioinformatics*, *10*(1), 48–48. doi: [10.1186/1471-2105-10-  
558 48](https://doi.org/10.1186/1471-2105-10-48)
- 559 Finsterwald, C., & Alberini, C. M. (2014). Stress and glucocorticoid receptor-dependent mechanisms in long-term  
560 memory: From adaptive responses to psychopathologies. *Neurobiology of Learning and Memory*, *112*, 17–  
561 29. doi: [10.1016/j.nlm.2013.09.017](https://doi.org/10.1016/j.nlm.2013.09.017)
- 562 Formica, V. A., Gonser, R. A., Ramsay, S., & Tuttle, E. M. (2004). Spatial dynamics of alternative reproductive  
563 strategies: the role of neighbors. *Ecology*, *85*(4), 1125–1136.
- 564 Gluckman, P. D., Hanson, M. A., Cooper, C., & Thornburg, K. L. (2008). Effect of In Utero and Early-Life  
565 Conditions on Adult Health and Disease. *New England Journal of Medicine*, *359*(1), 61–73. doi:  
566 [10.1056/NEJMra0708473](https://doi.org/10.1056/NEJMra0708473)
- 567 Gott, A. J. (2018). Effects of early-life adversity on the adult phenotype in European starlings. Doctoral dissertation,  
568 Newcastle University.
- 569 Greggor, A. L., Spencer, K. A., Clayton, N. S., & Thornton, A. (2017). Wild jackdaws' reproductive success and  
570 their offspring's stress hormones are connected to provisioning rate and brood size, not to parental  
571 neophobia. *General and Comparative Endocrinology*, *243*, 70–77. doi: [10.1016/j.ygcen.2016.11.006](https://doi.org/10.1016/j.ygcen.2016.11.006)
- 572 Griebel, I. A., Fairhurst, G. D., Marchant, T. A., & Clark, R. G. (2019). Effects of parental and nest-site  
573 characteristics on nestling quality in the Tree Swallow (*Tachycineta bicolor*). *Canadian Journal of Zoology*,  
574 *97*(1), 63–71. doi: [10.1139/cjz-2018-0109](https://doi.org/10.1139/cjz-2018-0109)
- 575 Griffiths, R., Double, M. C., Orr, K., & Dawson, R. J. G. (1998). A DNA test to sex most birds. *Molecular Ecology*,  
576 *7*(8), 1071–1075. doi: [10.1046/j.1365-294x.1998.00389.x](https://doi.org/10.1046/j.1365-294x.1998.00389.x)
- 577 Grunst, A. S., Grunst, M. L., Formica, V. A., Korody, M. L., Betuel, A. M., Barcelo-Serra, M., ... Tuttle, E. M.  
578 (2018a). Morph-Specific Patterns of Reproductive Senescence: Connections to Discrete Reproductive  
579 Strategies. *The American Naturalist*, *191*(6), 744–755. doi: [10.1086/697377](https://doi.org/10.1086/697377)
- 580 Grunst, A. S., Grunst, M. L., Gonser, R. A., & Tuttle, E. M. (2019). Developmental stress and telomere dynamics in  
581 a genetically polymorphic species. *Journal of Evolutionary Biology*, *32*(2), 134–143. doi:  
582 [10.1111/jeb.13400](https://doi.org/10.1111/jeb.13400)



- 583 Grunst, M. L., Grunst, A. S., Formica, V. A., Korody, M. L., Betuel, A. M., Barcelo-Serra, M., ... Tuttle, E. M.  
584 (2018b). Actuarial senescence in a dimorphic bird: different rates of ageing in morphs with discrete  
585 reproductive strategies. *Proceedings of the Royal Society B: Biological Sciences*, 285(1892), 20182053. doi:  
586 [10.1098/rspb.2018.2053](https://doi.org/10.1098/rspb.2018.2053)
- 587 Heim, C., Newport, D. J., Mletzko, T., Miller, A. H., & Nemeroff, C. B. (2008). The link between childhood trauma  
588 and depression: Insights from HPA axis studies in humans. *Psychoneuroendocrinology*, 33(6), 693–710.  
589 doi: [10.1016/j.psyneuen.2008.03.008](https://doi.org/10.1016/j.psyneuen.2008.03.008)
- 590 Horton, B. M., & Holberton, R. L. (2010). Morph-Specific Variation in Baseline Corticosterone and the  
591 Adrenocortical Response in Breeding White-Throated Sparrows (*Zonotrichia albicollis*). *The Auk*, 127(3),  
592 540–548. doi: [10.1525/auk.2010.09096](https://doi.org/10.1525/auk.2010.09096)
- 593 Horton, B. M., Moore, I. T., & Maney, D. L. (2014). New insights into the hormonal and behavioural correlates  
594 of polymorphism in white-throated sparrows, *Zonotrichia albicollis*. *Animal Behaviour*, 93, 207–219. doi:  
595 [10.1016/j.anbehav.2014.04.015](https://doi.org/10.1016/j.anbehav.2014.04.015)
- 596 Horvath, S. (2011). *Weighted network analysis: application in genomics and systems biology*. New York, NY:  
597 Springer.
- 598 Hu, Z., Chang, Y.-C., Wang, Y., Huang, C.-L., Liu, Y., Tian, F., ... DeLisi, C. (2013). VisANT 4.0: Integrative  
599 network platform to connect genes, drugs, diseases and therapies. *Nucleic Acids Research*, 41(W1), W225–  
600 W231.
- 601 Jacquin, L., Blottière, L., Haussy, C., Perret, S., & Gasparini, J. (2012). Prenatal and postnatal parental effects on  
602 immunity and growth in ‘lactating’ pigeons: Prenatal and postnatal parental effects. *Functional Ecology*,  
603 26(4), 866–875. doi: [10.1111/j.1365-2435.2012.01988.x](https://doi.org/10.1111/j.1365-2435.2012.01988.x)
- 604 Kernbach, M.E., Newhouse, D.J., Miller, J.M., Hall, R.J., Gibbons, J., Oberstaller, J., Selechnik, D., Jiang, R.,  
605 Unnasch, T.R., Balakrishnan, C.N., & L.B. Martin. Light pollution increases West Nile virus competence of  
606 a ubiquitous passerine reservoir species. *In review*.
- 607 Kim, S.-H., Kim, H.-J., & Kim, C.-W. (2016). GLCCI1 is a novel component associated with the PI3K signaling  
608 pathway in podocyte foot processes. *Experimental & Molecular Medicine*, 48(5), e233–e233. doi:  
609 [10.1038/emm.2016.28](https://doi.org/10.1038/emm.2016.28)
- 610 Kinnally, E. L., Feinberg, C., Kim, D., Ferguson, K., Leibel, R., Coplan, J. D., & John Mann, J. (2011). DNA  
611 methylation as a risk factor in the effects of early life stress. *Brain, Behavior, and Immunity*, 25(8), 1548–  
612 1553. doi: [10.1016/j.bbi.2011.05.001](https://doi.org/10.1016/j.bbi.2011.05.001)
- 613 Knapton, R. W., Cartar, R. V., & Falls, J. B. (1984). A comparison of breeding ecology and reproductive success  
614 between morphs of the white-throated sparrow. *The Wilson Bulletin*, 60–71.
- 615 Knapton, R. W., & Falls, J. B. (1983). Differences in parental contribution among pair types in the polymorphic  
616 White-throated Sparrow. *Canadian Journal of Zoology*, 61(6), 1288–1292. doi: [10.1139/z83-173](https://doi.org/10.1139/z83-173)
- 617 Kopachena, J. G., & Falls, J. B. (1993). Aggressive Performance as a Behavioral Correlate of Plumage  
618 Polymorphism in the White-Throated Sparrow (*Zonotrichia albicollis*). *Behaviour*, 124(3/4), 249–266.
- 619 Krause, E. T., Honarmand, M., Wetzel, J., & Naguib, M. (2009). Early Fasting Is Long Lasting: Differences in Early  
620 Nutritional Conditions Reappear under Stressful Conditions in Adult Female Zebra Finches. *PLoS ONE*,  
621 4(3), e5015. doi: [10.1371/journal.pone.0005015](https://doi.org/10.1371/journal.pone.0005015)
- 622 Langfelder, P., & Horvath, S. (2008). WGCNA: an R package for weighted correlation network analysis. *BMC*  
623 *Bioinformatics*, 9(1), 559–559. doi: [10.1186/1471-2105-9-559](https://doi.org/10.1186/1471-2105-9-559)
- 624 Larsen, D. H., Poinsignon, C., Gudjonsson, T., Dinant, C., Payne, M. R., Hari, F. J., ... Lukas, J. (2010). The  
625 chromatin-remodeling factor CHD4 coordinates signaling and repair after DNA damage. *The Journal of*  
626 *Cell Biology*, 190(5), 731–740.
- 627 Ledón-Rettig, C. C., Richards, C. L., & Martin, L. B. (2013). Epigenetics for behavioral ecologists. *Behavioral*  
628 *Ecology*, 24(2), 311–324. doi: [10.1093/beheco/ars145](https://doi.org/10.1093/beheco/ars145)
- 629 Lewis, C. R., & Olive, M. F. (2014). Early-life stress interactions with the epigenome: potential mechanisms driving  
630 vulnerability toward psychiatric illness. *Behavioural Pharmacology*, 1. doi:  
631 [10.1097/FBP.0000000000000057](https://doi.org/10.1097/FBP.0000000000000057)
- 632 Li, H. (2011). A statistical framework for SNP calling, mutation discovery, association mapping and population  
633 genetical parameter estimation from sequencing data. *Bioinformatics*, 27(21), 2987–2993.
- 634 Li, H. (2013). Aligning sequence reads, clone sequences and assembly contigs with BWA-MEM. *ArXiv:1303.3997*  
635 [*q-Bio*]. Retrieved from <http://arxiv.org/abs/1303.3997>

- 636 Li, H., Handsaker, B., Wysoker, A., Fennell, T., Ruan, J., Homer, N., ... Subgroup, 1000 Genome Project Data  
637 Processing. (2009). The Sequence Alignment/Map format and SAMtools. *Bioinformatics*, 25(16), 2078–  
638 2079.
- 639 Lima, S. L. (2009). Predators and the breeding bird: behavioral and reproductive flexibility under the risk of  
640 predation. *Biological Reviews*, 84(3), 485–513. doi: [10.1111/j.1469-185X.2009.00085.x](https://doi.org/10.1111/j.1469-185X.2009.00085.x)
- 641 Liu, D., Diorio, J., Tannenbaum, B., Caldji, C., Francis, D., Freedman, A., ... Meaney, M. J. (1997). Maternal Care,  
642 Hippocampal Glucocorticoid Receptors, and Hypothalamic-Pituitary-Adrenal Responses to Stress. *Science*,  
643 277(5332), 1659–1662.
- 644 Livneh, I., Cohen-Kaplan, V., Cohen-Rosenzweig, C., Avni, N., & Ciechanover, A. (2016). The life cycle of the 26S  
645 proteasome: from birth, through regulation and function, and onto its death. *Cell Research*, 26, 869–869.
- 646 Lloyd, J. D., & Martin, T. E. (2004). Nest-site preference and maternal effects on offspring growth. *Behavioral*  
647 *Ecology*, 15(5), 816–823. doi: [10.1093/beheco/arh085](https://doi.org/10.1093/beheco/arh085)
- 648 Longmire, J. L., Gee, G. F., Hardekopf, C. L., & Mark, G. A. (1992). Establishing paternity in whooping cranes  
649 (*Grus americana*) by DNA analysis. *The Auk*, 109(3), 522-529.
- 650 Louder, M. I. M., Hauber, M. E., & Balakrishnan, C. N. (2018). Early social experience alters transcriptomic  
651 responses to species-specific song stimuli in female songbirds. *Behavioural Brain Research*, 347, 69–76.  
652 doi: [10.1016/j.bbr.2018.02.034](https://doi.org/10.1016/j.bbr.2018.02.034)
- 653 Love, M. I., Huber, W., & Anders, S. (2014). Moderated estimation of fold change and dispersion for RNA-seq data  
654 with DESeq2. *Genome Biology*, 15(12), 550–550. doi: [10.1186/s13059-014-0550-8](https://doi.org/10.1186/s13059-014-0550-8)
- 655 Lowdon, R. F., Jang, H. S., & Wang, T. (2016). Evolution of Epigenetic Regulation in Vertebrate Genomes. *Trends*  
656 *in Genetics*, 32(5), 269–283. doi: [10.1016/j.tig.2016.03.001](https://doi.org/10.1016/j.tig.2016.03.001)
- 657 Lowther, J. K. (1961). Polymorphism in the white-throated sparrow, *Zonotrichia albicollis* (Gmelin). *Canadian*  
658 *Journal of Zoology*, 39(3), 281–292. doi: [10.1139/z61-031](https://doi.org/10.1139/z61-031)
- 659 Lowther, J. K. (1962). *Colour and Behavioural Polymorphism in the White-throated Sparrow, Zonotrichia Albicollis*  
660 (*Gmelin*). Doctoral dissertation, University of Toronto.
- 661 Lupien, S. J., McEwen, B. S., Gunnar, M. R., & Heim, C. (2009). Effects of stress throughout the lifespan on the  
662 brain, behaviour and cognition. *Nature Reviews Neuroscience*, 10(6), 434–445. doi: [10.1038/nrn2639](https://doi.org/10.1038/nrn2639)
- 663 Marco, E. M., Echeverry-Alzate, V., López-Moreno, J. A., Giné, E., Peñasco, S., & Viveros, M. P. (2014).  
664 Consequences of early life stress on the expression of endocannabinoid-related genes in the rat brain.  
665 *Behavioural Pharmacology*, 25(5–6), 547–556. doi: [10.1097/FBP.0000000000000068](https://doi.org/10.1097/FBP.0000000000000068)
- 666 Marini, F., & Binder, H. (2016). Development of Applications for Interactive and Reproducible Research: a Case  
667 Study. *Genomics and Computational Biology*, 3(1), 39. doi: [10.18547/gcb.2017.vol3.iss1.e39](https://doi.org/10.18547/gcb.2017.vol3.iss1.e39)
- 668 Martin, M. (2011). Cutadapt removes adapter sequences from high-throughput sequencing reads. *EMBnet.Journal*,  
669 17(1), 10–10. doi: [10.14806/ej.17.1.200](https://doi.org/10.14806/ej.17.1.200)
- 670 McCoy, C. R., Rana, S., Stringfellow, S. A., Day, J. J., Wyss, J. M., Clinton, S. M., & Kerman, I. A. (2016).  
671 Neonatal maternal separation stress elicits lasting DNA methylation changes in the hippocampus of stress-  
672 reactive Wistar Kyoto rats. *European Journal of Neuroscience*, 44(10), 2829–2845. doi: [10.1111/ejn.13404](https://doi.org/10.1111/ejn.13404)
- 673 McEwen, B. S. (2007). Physiology and Neurobiology of Stress and Adaptation: Central Role of the Brain.  
674 *Physiological Reviews*, 87(3), 873–904. doi: [10.1152/physrev.00041.2006](https://doi.org/10.1152/physrev.00041.2006)
- 675 McGowan, P. O., Sasaki, A., D'Alessio, A. C., Dymov, S., Labonté, B., Szyf, M., ... Meaney, M. J. (2009).  
676 Epigenetic regulation of the glucocorticoid receptor in human brain associates with childhood abuse. *Nature*  
677 *Neuroscience*, 12, 342–342.
- 678 Meaney, M. J. (2001). Maternal Care, Gene Expression, and the Transmission of Individual Differences in Stress  
679 Reactivity Across Generations. *Annual Review of Neuroscience*, 24(1), 1161–1192. doi:  
680 [10.1146/annurev.neuro.24.1.1161](https://doi.org/10.1146/annurev.neuro.24.1.1161)
- 681 Michopoulos, V., Maney, D. L., Morehouse, C. B., & Thomas, J. W. (2007). A genotyping assay to determine  
682 plumage morph in the white-throated sparrow (*Zonotrichia albicollis*). *The Auk*, 124(4), 1330.  
683 doi:[10.1642/0004-8038\(2007\)124\[1330:AGATDP\]2.0.CO;2](https://doi.org/10.1642/0004-8038(2007)124[1330:AGATDP]2.0.CO;2)
- 684 Millstein, R. A., & Holmes, A. (2007). Effects of repeated maternal separation on anxiety- and depression-related  
685 phenotypes in different mouse strains. *Neuroscience & Biobehavioral Reviews*, 31(1), 3–17. doi:  
686 [10.1016/j.neubiorev.2006.05.003](https://doi.org/10.1016/j.neubiorev.2006.05.003)
- 687 Mock, D. W., & Parker, G. A. (1997). *The evolution of sibling rivalry*. Oxford; New York: Oxford University  
688 Press.

- 689 Moghadam, H. K., Johnsen, H., Robinson, N., Andersen, Ø., H. Jørgensen, E., Johnsen, H. K., ... Tveiten, H.  
690 (2017). Impacts of Early Life Stress on the Methylome and Transcriptome of Atlantic Salmon. *Scientific*  
691 *Reports*, 7(1). doi: [10.1038/s41598-017-05222-2](https://doi.org/10.1038/s41598-017-05222-2)
- 692 Monaghan, P. (2014). Organismal stress, telomeres and life histories. *Journal of Experimental Biology*, 217(1), 57–  
693 66. doi: [10.1242/jeb.090043](https://doi.org/10.1242/jeb.090043)
- 694 Mousseau, T. A., & Fox, C. W. (Eds.). (1998). *Maternal effects as adaptations*. New York: Oxford University Press.
- 695 Murgatroyd, C., Patchev, A. V., Wu, Y., Micale, V., Bockmühl, Y., Fischer, D., ... Spengler, D. (2009). Dynamic  
696 DNA methylation programs persistent adverse effects of early-life stress. *Nature Neuroscience*, 12(12),  
697 1559–1566. doi: [10.1038/nn.2436](https://doi.org/10.1038/nn.2436)
- 698 Noguera, J. C., Kim, S.-Y., & Velando, A. (2017). Family-transmitted stress in a wild bird. *Proceedings of the*  
699 *National Academy of Sciences*, 114(26), 6794–6799. Retrieved from  
700 <http://www.pnas.org/content/early/2017/06/06/1706164114.abstract>
- 701 Nord, A., & Nilsson, J.-Å. (2011). Incubation Temperature Affects Growth and Energy Metabolism in Blue Tit  
702 Nestlings. *The American Naturalist*, 178(5), 639–651. doi: [10.1086/662172](https://doi.org/10.1086/662172)
- 703 Pértille, F., Brantsæter, M., Nordgreen, J., Coutinho, L. L., Janczak, A. M., Jensen, P., & Guerrero-Bosagna, C.  
704 (2017). DNA methylation profiles in red blood cells of adult hens correlate with their rearing conditions.  
705 *The Journal of Experimental Biology*, 220(19), 3579–3587. doi: [10.1242/jeb.157891](https://doi.org/10.1242/jeb.157891)
- 706 Peterson, T. R., Laplante, M., Thoreen, C. C., Sancak, Y., Kang, S. A., Kuehl, W. M., ... Sabatini, D. M. (2009).  
707 DEPTOR Is an mTOR Inhibitor Frequently Overexpressed in Multiple Myeloma Cells and Required for  
708 Their Survival. *Cell*, 137(5), 873–886. doi: [10.1016/j.cell.2009.03.046](https://doi.org/10.1016/j.cell.2009.03.046)
- 709 Quinlan, A. R., & Hall, I. M. (2010). BEDTools: a flexible suite of utilities for comparing genomic features.  
710 *Bioinformatics*, 26(6), 841–842.
- 711 Quirici, V., Guerrero, C. J., Krause, J. S., Wingfield, J. C., & Vásquez, R. A. (2016). The relationship of telomere  
712 length to baseline corticosterone levels in nestlings of an altricial passerine bird in natural populations.  
713 *Frontiers in Zoology*, 13(1). doi: [10.1186/s12983-016-0133-5](https://doi.org/10.1186/s12983-016-0133-5)
- 714 R Core Team (2013). R: A language and environment for statistical computing.
- 715 Reshetnikov, V. V., Studenikina, A. A., Ryabushkina, J. A., Merkulova, T. I., & Bondar, N. P. (2018). The impact of  
716 early-life stress on the expression of HPA-associated genes in the adult murine brain. *Behaviour*, 155(2–3),  
717 181–203. doi: [10.1163/1568539X-00003482](https://doi.org/10.1163/1568539X-00003482)
- 718 Romanov, M. N., Tuttle, E. M., Houck, M. L., Modi, W. S., Chemnick, L. G., Korody, M. L., ... Ryder, O. A.  
719 (2009). The value of avian genomics to the conservation of wildlife. *BMC Genomics*, 10(Suppl 2), S10. doi:  
720 [10.1186/1471-2164-10-S2-S10](https://doi.org/10.1186/1471-2164-10-S2-S10)
- 721 Royle, N. J., Smiseth, P. T., & Kölliker, M. (Eds.). (2012). *The evolution of parental care*. Oxford University Press.
- 722 Rubenstein, D. R., Skolnik, H., Berrio, A., Champagne, F. A., Phelps, S., & Solomon, J. (2016). Sex-specific fitness  
723 effects of unpredictable early life conditions are associated with DNA methylation in the avian  
724 glucocorticoid receptor. *Molecular Ecology*, 25(8), 1714–1728. doi: [10.1111/mec.13483](https://doi.org/10.1111/mec.13483)
- 725 Schrader, M., Jarrett, B. J. M., & Kilner, R. M. (2018). Parental care and sibling competition independently increase  
726 phenotypic variation among burying beetle siblings. *Evolution*, 72(11), 2546–2552. doi: [10.1111/evo.13607](https://doi.org/10.1111/evo.13607)
- 727 Schwander, T., Libbrecht, R., & Keller, L. (2014). Supergenes and Complex Phenotypes. *Current Biology*, 24(7),  
728 R288–R294. doi: [10.1016/j.cub.2014.01.056](https://doi.org/10.1016/j.cub.2014.01.056)
- 729 Shang, F., & Taylor, A. (2011). Ubiquitin–proteasome pathway and cellular responses to oxidative stress. *Free*  
730 *Radical Biology and Medicine*, 51(1), 5–16. doi: [10.1016/j.freeradbiomed.2011.03.031](https://doi.org/10.1016/j.freeradbiomed.2011.03.031)
- 731 Sheldon, E. L., Schrey, A. W., Ragsdale, A. K., & Griffith, S. C. (2018). Brood size influences patterns of DNA  
732 methylation in wild Zebra Finches (*Taeniopygia guttata*). *The Auk*, 135(4), 1113–1122. doi:  
733 [10.1642/AUK-18-61.1](https://doi.org/10.1642/AUK-18-61.1)
- 734 Silberman, D. M., Acosta, G. B., & Zorrilla Zubilete, M. A. (2016). Long-term effects of early life stress exposure:  
735 Role of epigenetic mechanisms. *Pharmacological Research*, 109, 64–73. doi: [10.1016/j.phrs.2015.12.033](https://doi.org/10.1016/j.phrs.2015.12.033)
- 736 Smith, J.N., Newhouse, D.J., Balakrishnan, C.N., Tuttle, E.M., & Gonser, R.A. Differential morph gene expression in  
737 chromosome three of the white-throated sparrow (*Zonotrichia albicollis*). *In review*.
- 738 Spencer, K. A. (2017). Developmental stress and social phenotypes: integrating neuroendocrine, behavioural and  
739 evolutionary perspectives. *Philosophical Transactions of the Royal Society B: Biological Sciences*,  
740 372(1727). Retrieved from <http://rstb.royalsocietypublishing.org/content/372/1727/20160242.abstract>

- 741 Spencer, K. A., Evans, N. P., & Monaghan, P. (2009). Postnatal Stress in Birds: A Novel Model of Glucocorticoid  
742 Programming of the Hypothalamic-Pituitary-Adrenal Axis. *Endocrinology*, *150*(4), 1931–1934. doi:  
743 [10.1210/en.2008-1471](https://doi.org/10.1210/en.2008-1471)
- 744 Spinney, L. H., Bentley, G. E., & Hau, M. (2006). Endocrine correlates of alternative phenotypes in the white-  
745 throated sparrow (*Zonotrichia albicollis*). *Hormones and Behavior*, *50*(5), 762–771. doi:  
746 [10.1016/j.yhbeh.2006.06.034](https://doi.org/10.1016/j.yhbeh.2006.06.034)
- 747 Swett, M. B., & Breuner, C. W. (2009). Plasma Testosterone Correlates with Morph Type across Breeding Substages  
748 in Male White-Throated Sparrows. *Physiological and Biochemical Zoology*, *82*(5), 572–579. doi:  
749 [10.1086/605392](https://doi.org/10.1086/605392)
- 750 Szyf, M. (2009). The early life environment and the epigenome. *Biochimica et Biophysica Acta (BBA) - General*  
751 *Subjects*, *1790*(9), 878–885. doi: [10.1016/j.bbagen.2009.01.009](https://doi.org/10.1016/j.bbagen.2009.01.009)
- 752 Szyf, M., Weaver, I., & Meaney, M. (2007). Maternal care, the epigenome and phenotypic differences in behavior.  
753 *Reproductive Toxicology*, *24*(1), 9–19. doi: [10.1016/j.reprotox.2007.05.001](https://doi.org/10.1016/j.reprotox.2007.05.001)
- 754 Taylor, S., & Campagna, L. (2016). Avian supergenes. *Science*, *351*(6272), 446–447. doi: [10.1126/science.aae0389](https://doi.org/10.1126/science.aae0389)
- 755 Thomas, J. W., Cáceres, M., Lowman, J. J., Morehouse, C. B., Short, M. E., Baldwin, E. L., ... Martin, C. L. (2008).  
756 The Chromosomal Polymorphism Linked to Variation in Social Behavior in the White-Throated Sparrow  
757 (*Zonotrichia albicollis*) Is a Complex Rearrangement and Suppressor of Recombination. *Genetics*, *179*(3),  
758 1455 LP – 1468.
- 759 Thorncroft, H. B. (1966). Chromosomal Polymorphism in the White-Throated Sparrow, *Zonotrichia albicollis*  
760 (Gmelin). *Science*, *154*(3756), 1571–1572.
- 761 Thorncroft, H. B. (1975). A cytogenetic study of the white-throated sparrow, *Zonotrichia albicollis* (Gmelin).  
762 *Evolution*, *29*(4), 611–621. doi:[10.1111/j.1558-5646.1975.tb00855.x](https://doi.org/10.1111/j.1558-5646.1975.tb00855.x)
- 763 Tomalty, K. M. H., Meek, M. H., Stephens, M. R., Rincón, G., Fangué, N. A., May, B. P., & Baerwald, M. R.  
764 (2015). Transcriptional Response to Acute Thermal Exposure in Juvenile Chinook Salmon Determined by  
765 RNAseq. *G3: Genes/Genomes/Genetics*, *5*(7), 1335 LP – 1349.
- 766 Trivers, R.L. (1972). Parental investment and sexual selection. In: *Sexual Selection and the Descent of Man* (B.  
767 Campbell, ed), pp. 136–179. Aldine, Chicago, IL.
- 768 Turner, J. D., Schote, A. B., Macedo, J. A., Pelascini, L. P. L., & Muller, C. P. (2006). Tissue specific glucocorticoid  
769 receptor expression, a role for alternative first exon usage? *Biochemical Pharmacology*, *72*(11), 1529–1537.  
770 doi: [10.1016/j.bcp.2006.07.005](https://doi.org/10.1016/j.bcp.2006.07.005)
- 771 Tuttle, E. (2003). Alternative reproductive strategies in the white-throated sparrow: behavioral and genetic evidence.  
772 *Behavioral Ecology*, *14*(3), 425–432.
- 773 Tuttle, E. M., Grunst, A. S., Grunst, M. L., Korody, M. L., Betuel, A. M., Barcelo-Serra, M., ... Gonser, R. A.  
774 (2017). Climatically driven changes in population composition and offspring sex-morph ratio in a  
775 polymorphic species. *Ecosphere*, *8*(4), e01762–e01762. doi: [10.1002/ecs2.1762](https://doi.org/10.1002/ecs2.1762)
- 776 Tuttle, E. M., Bergland, A. O., Korody, M. L., Brewer, M. S., Newhouse, D. J., Minx, P., ... Balakrishnan, C. N.  
777 (2016). Divergence and Functional Degradation of a Sex Chromosome-like Supergene. *Current Biology*,  
778 *26*(3), 344–350. doi: [10.1016/j.cub.2015.11.069](https://doi.org/10.1016/j.cub.2015.11.069)
- 779 van Oers, K., Kohn, G. M., Hinde, C. A., & Naguib, M. (2015). Parental food provisioning is related to nestling  
780 stress response in wild great tit nestlings: implications for the development of personality. *Frontiers in*  
781 *Zoology*, *12*(Suppl 1), S10. doi: [10.1186/1742-9994-12-S1-S10](https://doi.org/10.1186/1742-9994-12-S1-S10)
- 782 Wade, M. J. (1998). The evolutionary genetics of maternal effects Pp. 5–21 in Mousseau T. A & Fox C. W.,  
783 eds. *Maternal effects as adaptations*. Oxford Univ. Press, New York.
- 784 Wang, Y., Branicky, R., Noë, A., & Hekimi, S. (2018). Superoxide dismutases: Dual roles in controlling ROS  
785 damage and regulating ROS signaling. *The Journal of Cell Biology*, *217*(6), 1915–1928. doi:  
786 [10.1083/jcb.201708007](https://doi.org/10.1083/jcb.201708007)
- 787 Weaver, I. C. G., Cervoni, N., Champagne, F. A., D’Alessio, A. C., Sharma, S., Seckl, J. R., ... Meaney, M. J.  
788 (2004). Epigenetic programming by maternal behavior. *Nature Neuroscience*, *7*, 847–847.
- 789 Weaver, I. C. G., Meaney, M. J., & Szyf, M. (2006). Maternal care effects on the hippocampal transcriptome and  
790 anxiety-mediated behaviors in the offspring that are reversible in adulthood. *Proceedings of the National*  
791 *Academy of Sciences of the United States of America*, *103*(9), 3480 LP – 3485.
- 792 Wolf, J. B., & Wade, M. J. (2009). What are maternal effects (and what are they not)? *Philosophical Transactions of*  
793 *the Royal Society B: Biological Sciences*, *364*(1520), 1107–1115. doi: [10.1098/rstb.2008.0238](https://doi.org/10.1098/rstb.2008.0238)

- 794 Zelko, I. N., Mariani, T. J., & Folz, R. J. (2002). Superoxide dismutase multigene family: a comparison of the CuZn-  
795 SOD (SOD1), Mn-SOD (SOD2), and EC-SOD (SOD3) gene structures, evolution, and expression. *Free*  
796 *Radical Biology and Medicine*, 33(3), 337–349. doi: [10.1016/S0891-5849\(02\)00905-X](https://doi.org/10.1016/S0891-5849(02)00905-X)  
797 Zhang, B., & Horvath, S. (2005). A General Framework for Weighted Gene Co-Expression Network Analysis.  
798 *Statistical Applications in Genetics and Molecular Biology*, 4. doi: [10.2202/1544-6115.1128](https://doi.org/10.2202/1544-6115.1128)  
799 Zhao, H., Zhao, Y. G., Wang, X., Xu, L., Miao, L., Feng, D., ... Zhang, H. (2013). Mice deficient in *Epg5* exhibit  
800 selective neuronal vulnerability to degeneration. *The Journal of Cell Biology*, 200(6), 731 LP – 741.  
801 Zinzow-Kramer, W. M., Horton, B. M., McKee, C. D., Michaud, J. M., Tharp, G. K., Thomas, J. W., ... Maney, D.  
802 L. (2015). Genes located in a chromosomal inversion are correlated with territorial song in white-throated  
803 sparrows. *Genes, Brain and Behavior*, 14(8), 641–654. doi: [10.1111/gbb.12252](https://doi.org/10.1111/gbb.12252)  
804

805 **Data Accessibility**

806           The 32 RNAseq libraries used in this study will be submitted to the NCBI Sequence Read  
807 Archive (SRA). All files needed to produce these results, including code and counts files, will be  
808 uploaded to this project's GitHub page: <https://github.com/danielnewhouse/wtsp>

809

810 **Author Contributions**

811           DJN designed and performed research, analyzed the data, and wrote the paper. MBS  
812 performed research, contributed samples, and reviewed drafts of the paper. EMT designed and  
813 performed research and contributed samples. RAG designed and performed research, contributed  
814 samples, and reviewed drafts of the paper. CNB designed and performed research, contributed  
815 reagents, and reviewed drafts of the paper.

816 **Tables and Figures**

817 Table 1. WGCNA modules correlated with morph, strength of correlation ( $R^2$ ), p-value, hub  
818 gene(s) of module, and the degree distribution of hub gene(s).

| <b>Module</b> | <b><math>R^2</math></b> | <b>p-value</b>     | <b>Hub genes</b>                                                                                         | <b>DD of hub gene(s)</b> |
|---------------|-------------------------|--------------------|----------------------------------------------------------------------------------------------------------|--------------------------|
| Dark Red      | 0.47                    | 0.009              | TRAF5                                                                                                    | 32                       |
| Ivory         | -0.66                   | $9 \times 10^{-5}$ | GOPC, HDAC2, HINT3, TAF5L,<br>TRMT61B, MARC2                                                             | >29                      |
| Light Cyan    | 0.67                    | $5 \times 10^{-5}$ | BPNT1, EPM2A, LOC102066536<br>(GST-like), MAN1A1, MEI4,<br>RNASET2, SLC18B1, TTC32                       | >27                      |
| Salmon        | -0.5                    | 0.005              | NSL1                                                                                                     | 39                       |
| Sky Blue      | 0.53                    | 0.003              | DTX3L, EIF2AK2, IFIT5,<br>LOC102064521 (OASL),<br>LOC102065196 (IFI27L2), PARP9,<br>PARP14, RSAD2, ZNFX1 | >22                      |

819

820 Table 2. WGCNA modules correlated with pair type, strength of correlation ( $R^2$ ), p-value, hub  
821 gene(s) of module, and the degree distribution of hub gene(s).

| <b>Module</b> | <b><math>R^2</math></b> | <b>p-value</b>     | <b>Hub genes</b> | <b>DD of hub gene(s)</b> |
|---------------|-------------------------|--------------------|------------------|--------------------------|
| Beige         | -0.61                   | $3 \times 10^{-4}$ | DEPTOR           | 39                       |
| Blue          | -0.45                   | 0.01               | NDUFB3           | 42                       |

|             |       |                    |                           |     |
|-------------|-------|--------------------|---------------------------|-----|
| Cyan        | 0.46  | 0.01               | HELZ                      | 36  |
| Dark Orange | 0.7   | $1 \times 10^{-5}$ | NCOA6                     | 45  |
| Light Green | 0.6   | $4 \times 10^{-4}$ | CDK19, CHD4, EPG5         | >28 |
| Orange      | -0.45 | 0.01               | ZFX                       | 31  |
| Pink        | 0.37  | 0.04               | LOC102060916<br>(C12orf4) | 19  |

822

823



824 Figure 1. WGCNA module-trait correlation matrix. Each box contains the  $R^2$  correlation value  
825 followed by p-value in parentheses of a given trait with the module. Correlation values range  
826 from -1 to 1, with orange colors representing positive correlation and blue colors representing  
827 negative correlation.

828  
829 Figure 2. (A) Network of blue module, highlighting hub gene NDUFB3, along with normalized  
830 expression plots of (B) NDUFB3, as well as ubiquitin-mediated proteolysis-related genes (C)  
831 PSMD6 and (D) UBE2D3. TxW represents samples from nests sired by a T male and a W  
832 female. WxT represents samples from nests sired by a W male and a T female. Each circle  
833 represents a gene and diamonds represent hub genes described in Table 2.

834  
835 Figure 3. (A) Network of beige module, highlighting hub gene DEPTOR, along with normalized  
836 expression plots of hub gene (B) DEPTOR, as well as stress responsive genes (C) SOD2 and (D)  
837 NR3C1. TxW represents samples from nests sired by a T male and a W female. WxT represents  
838 samples from nests sired by a W male and a T female.

839  
840 Figure 4. (A) Network of light green module and normalized expression plots of hub genes (B)  
841 CDK19, (C) CHD4, and (D) EPG5. TxW represents samples from nests sired by a T male and a  
842 W female. WxT represent samples from nests sired by a W male and a T female. Each circle  
843 represents a gene and diamonds represent hub genes described in Table 2.

844

# Module-trait relationships

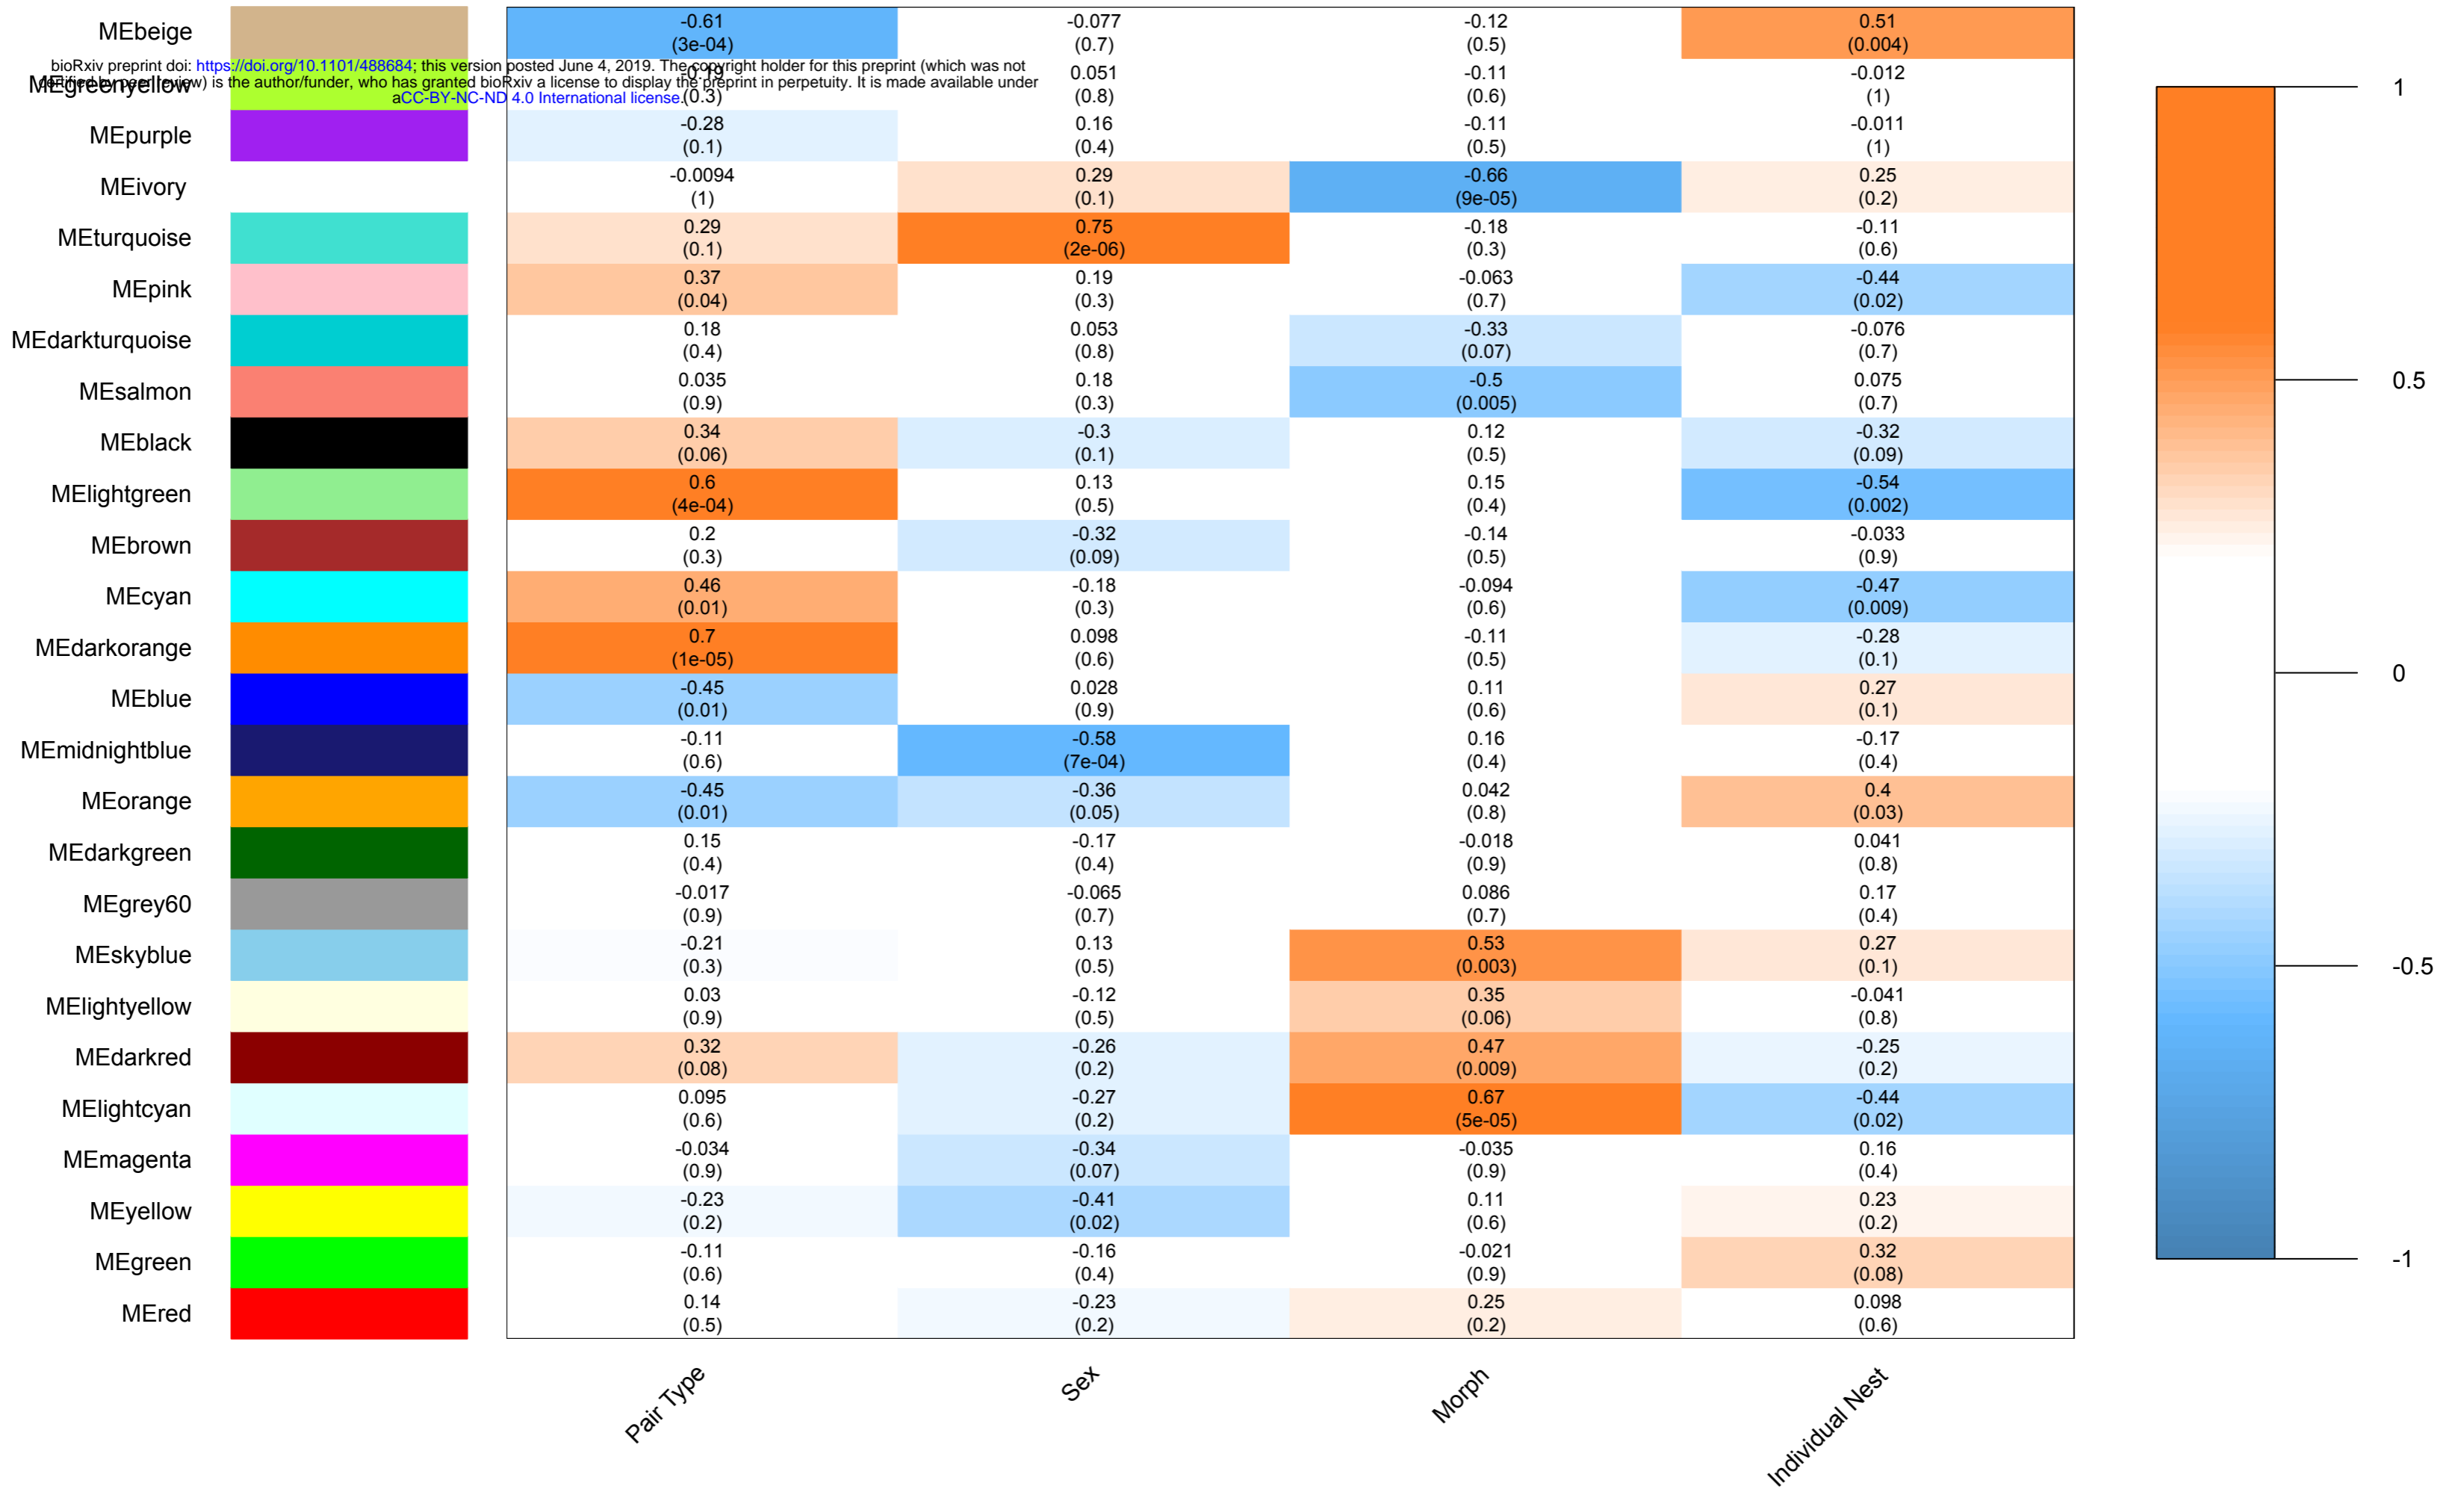

**A**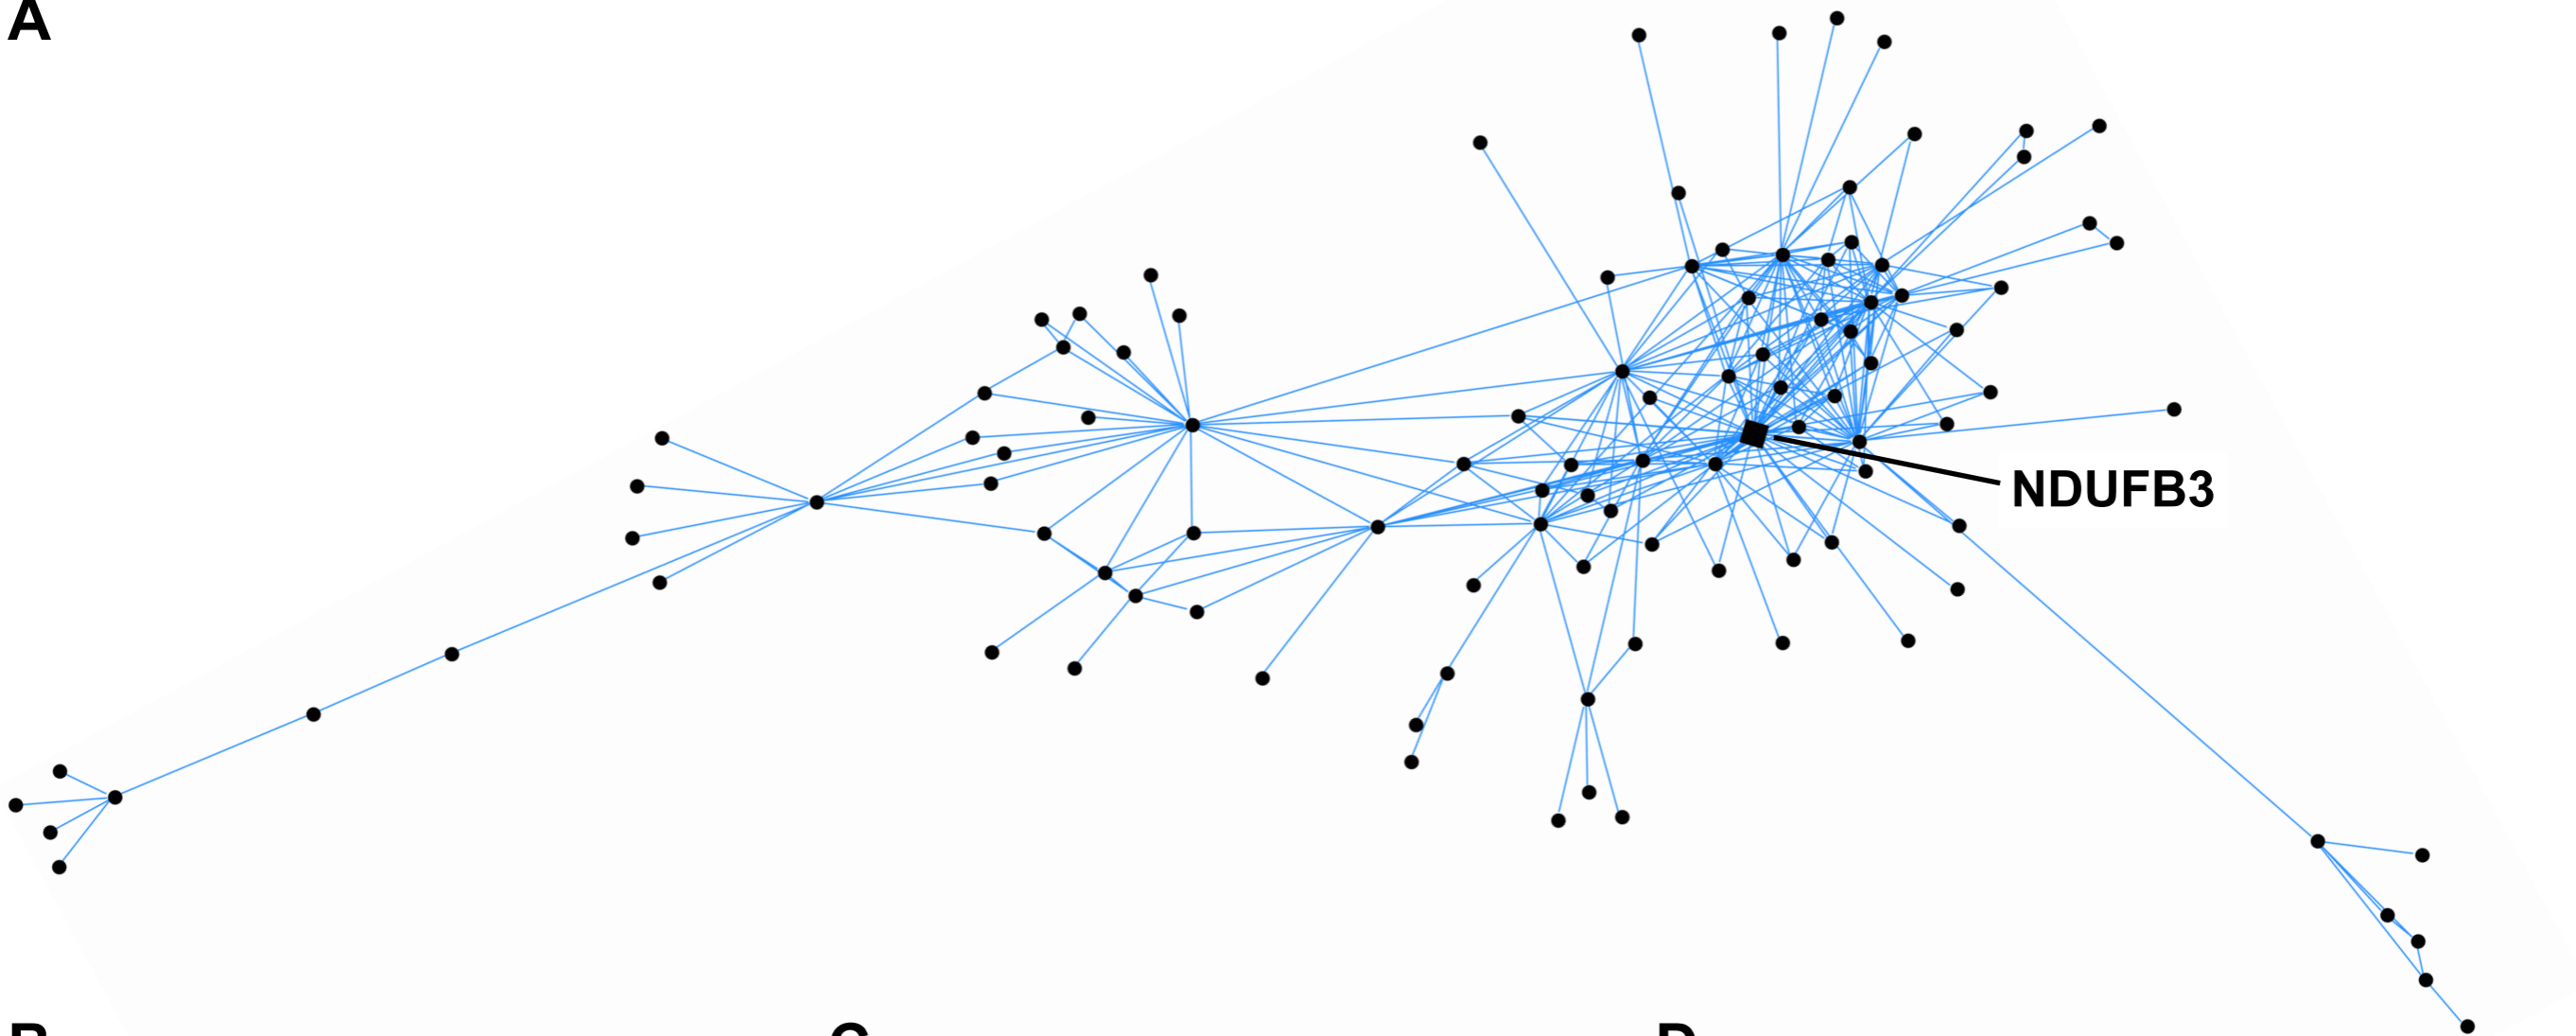**B**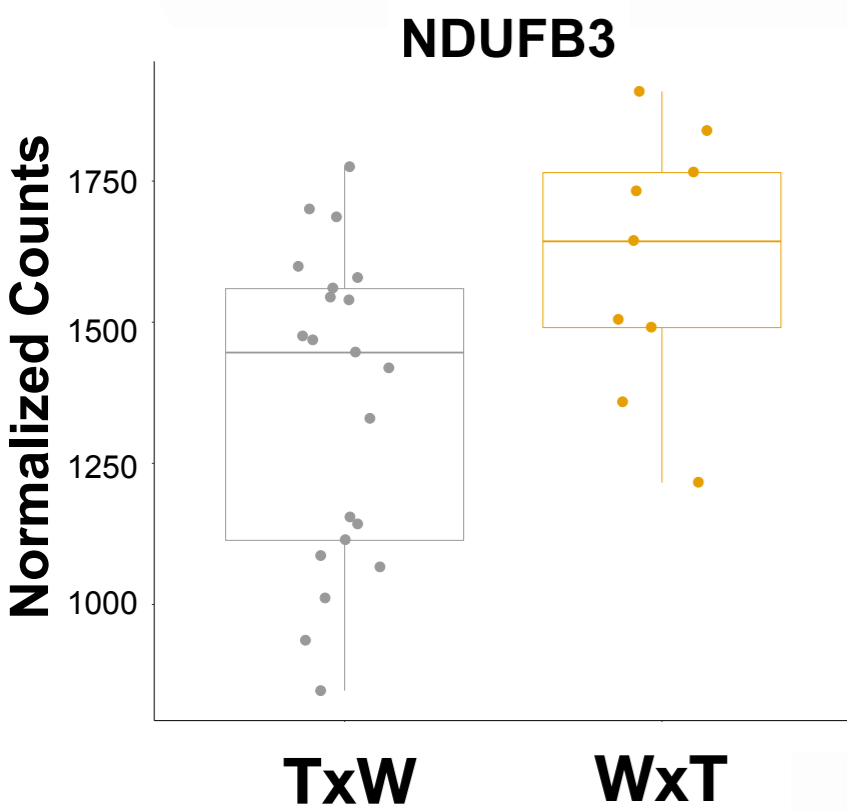**C**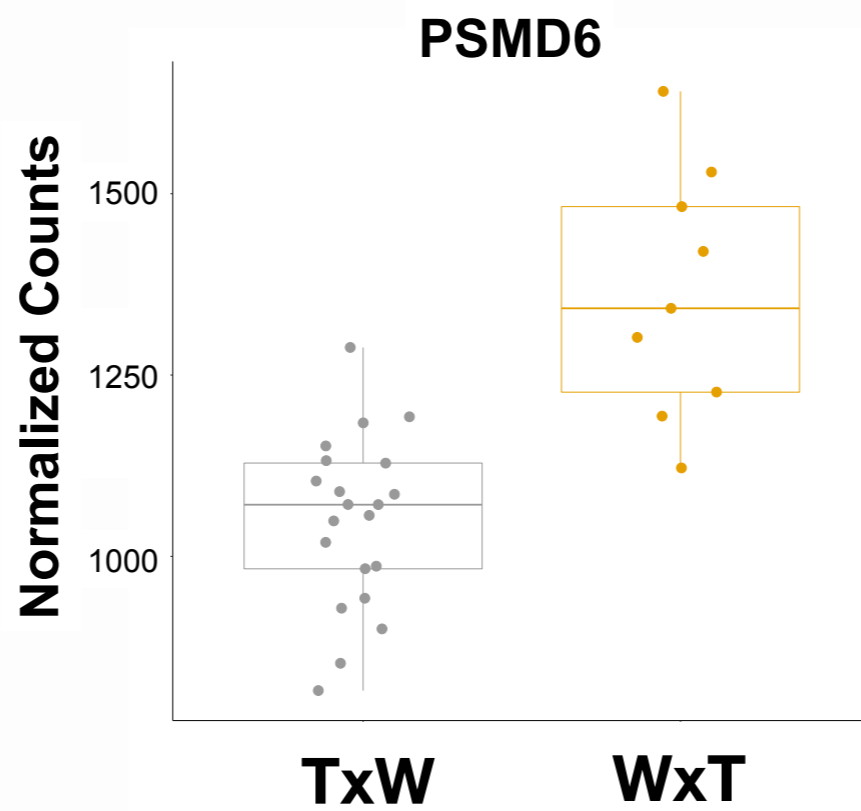**D**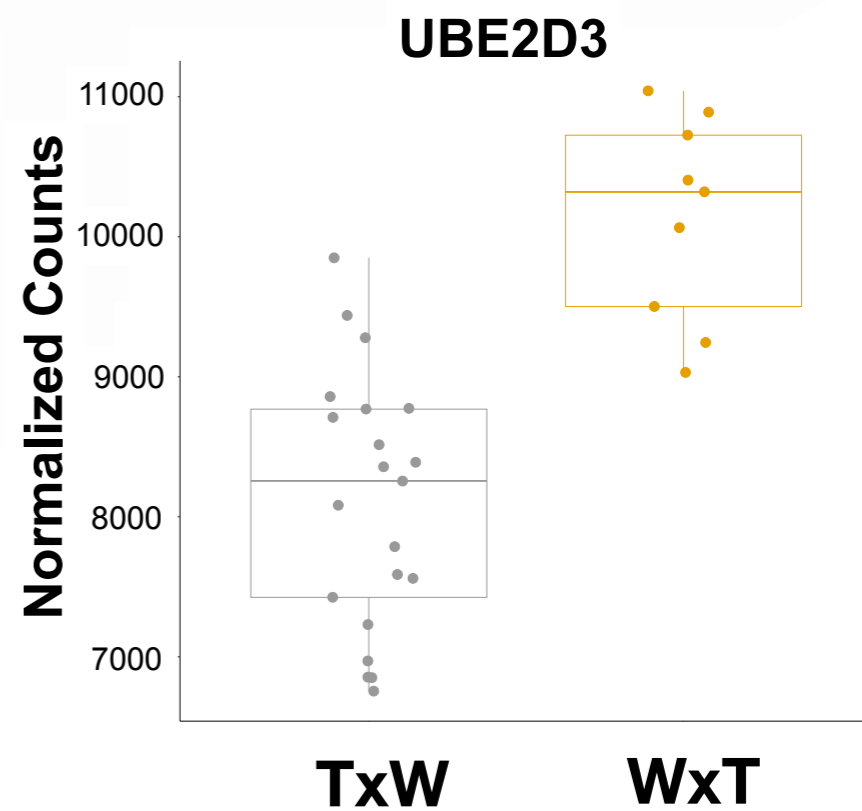

**A**

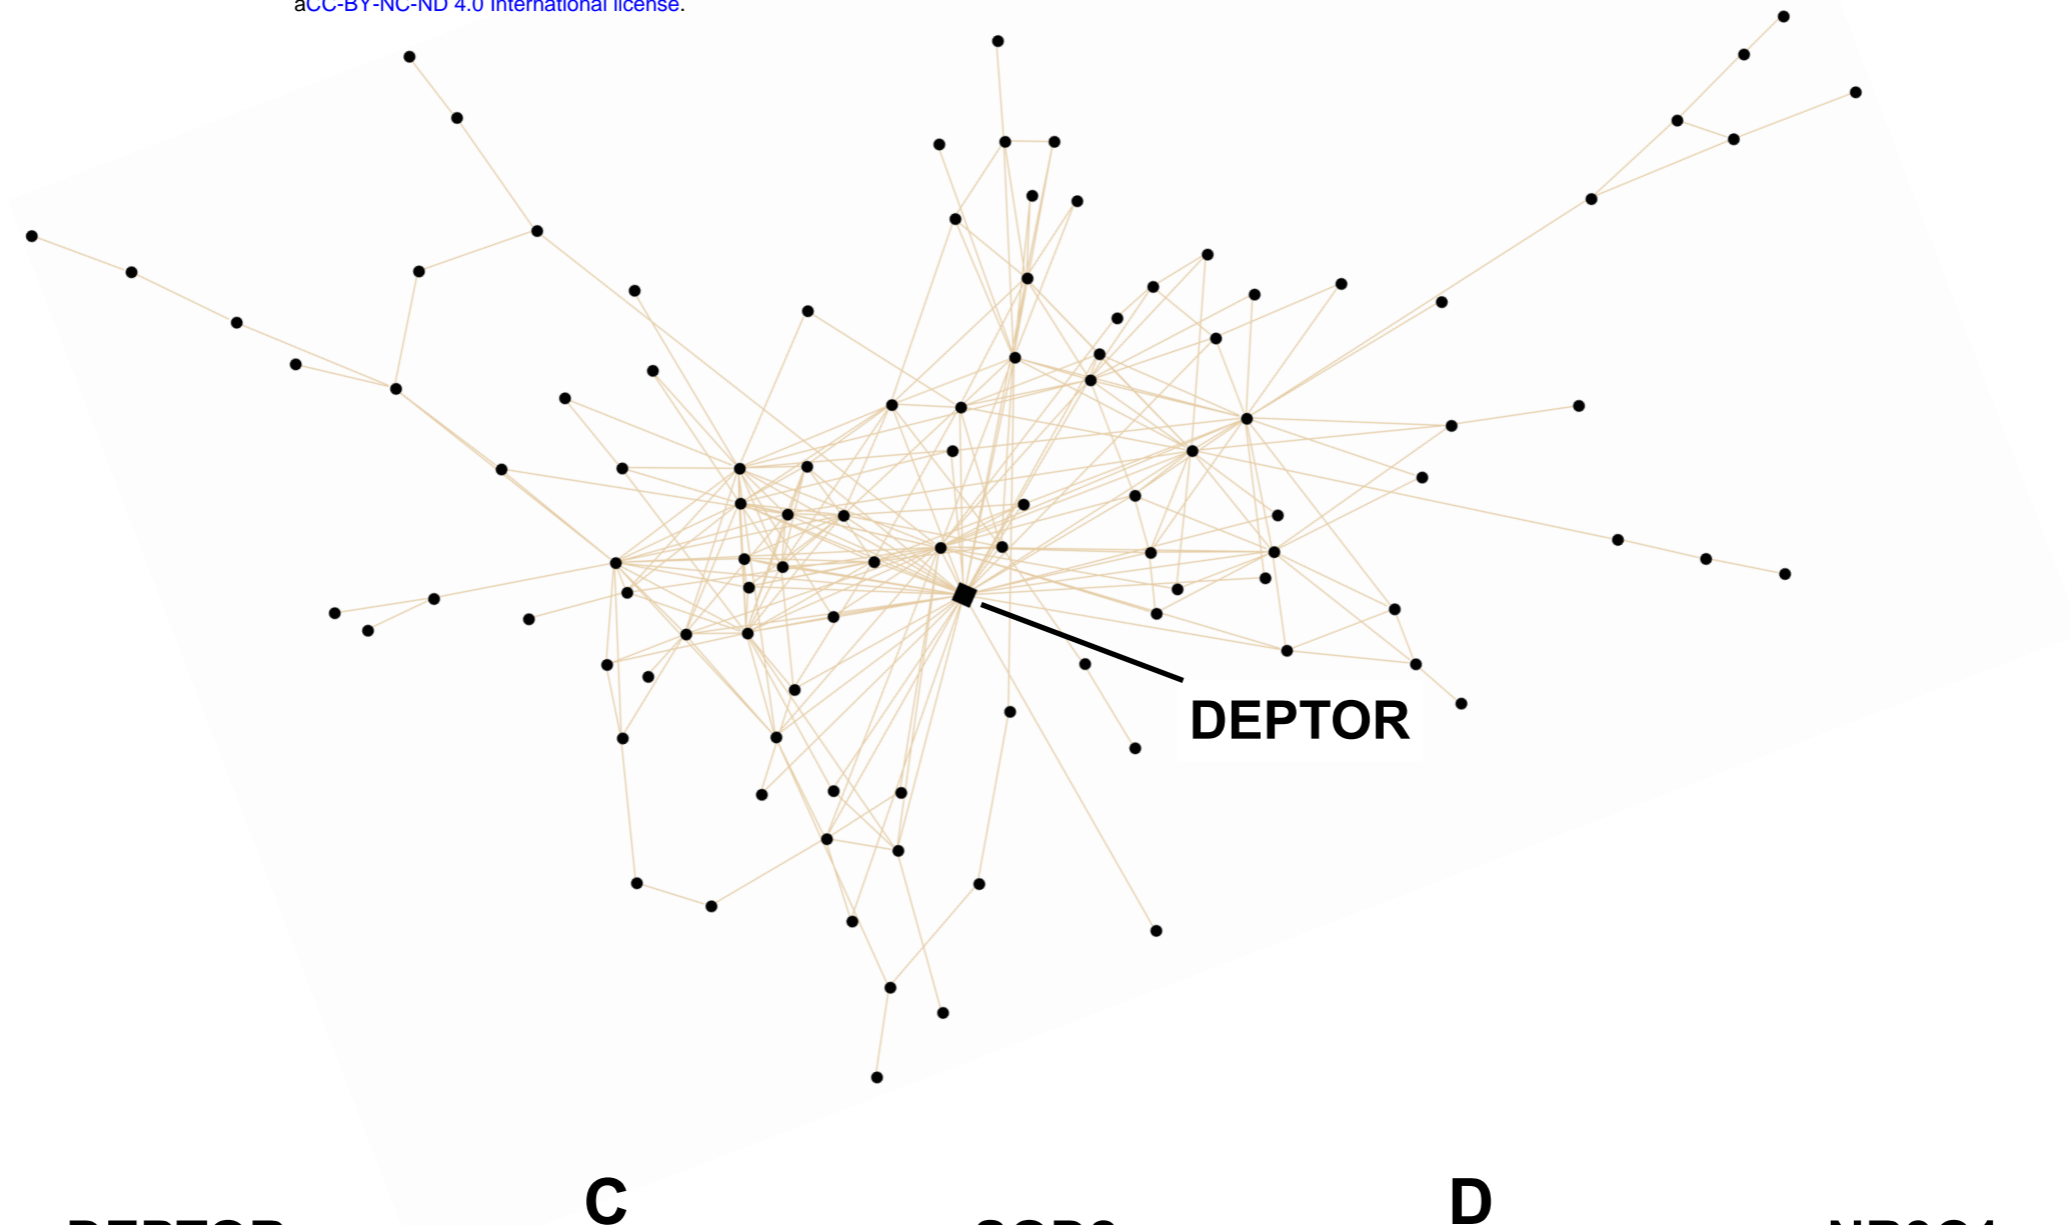

**B**

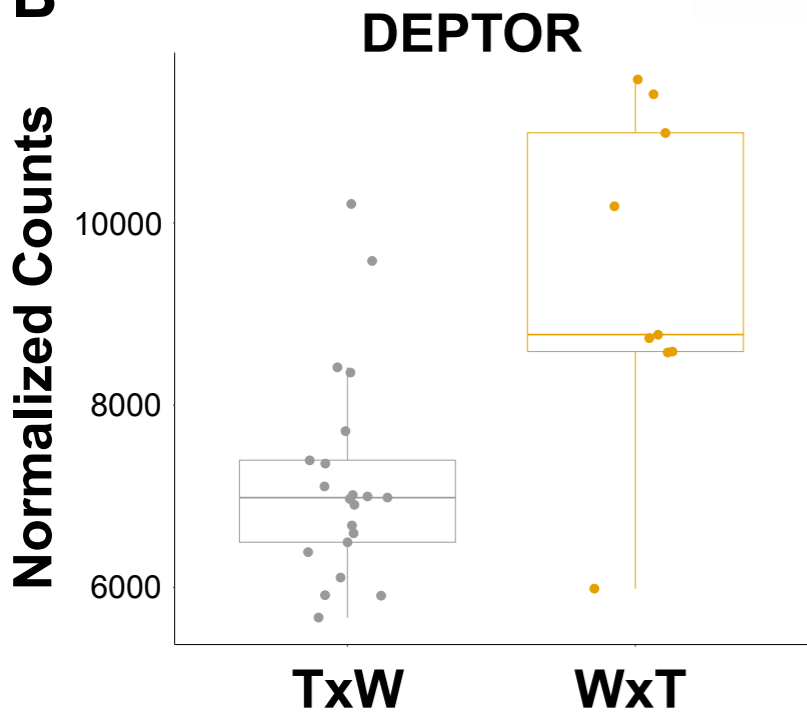

**C**

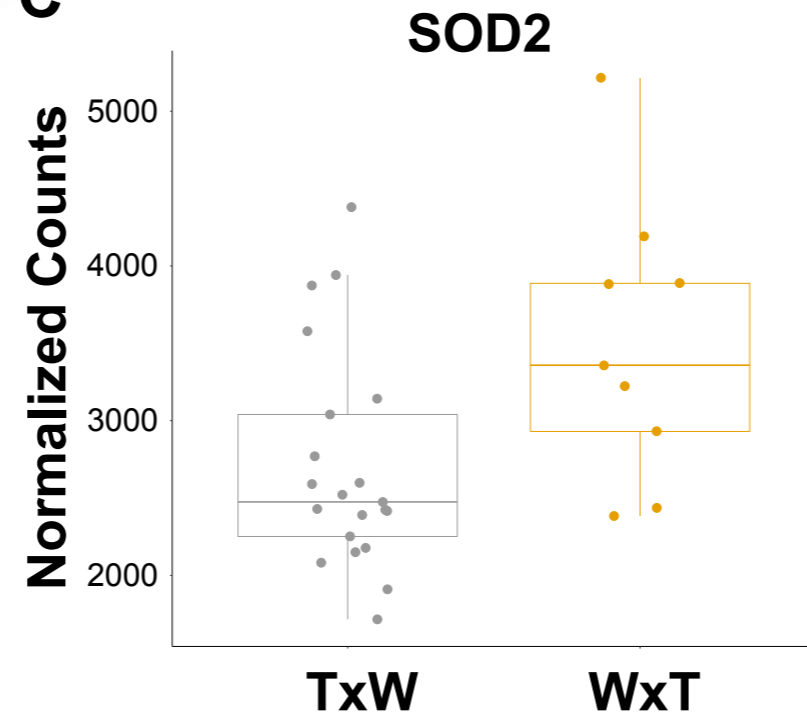

**D**

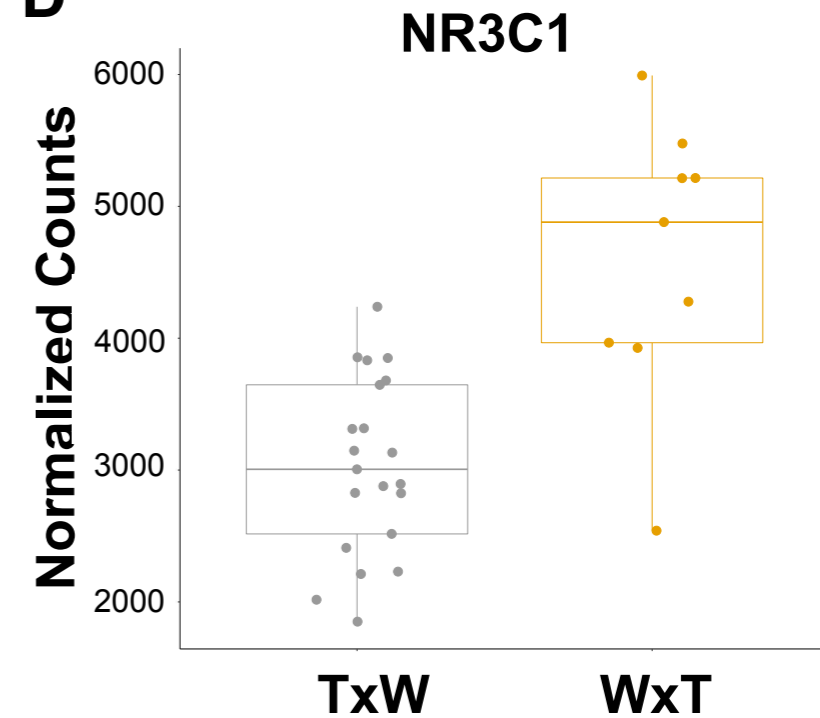

**A**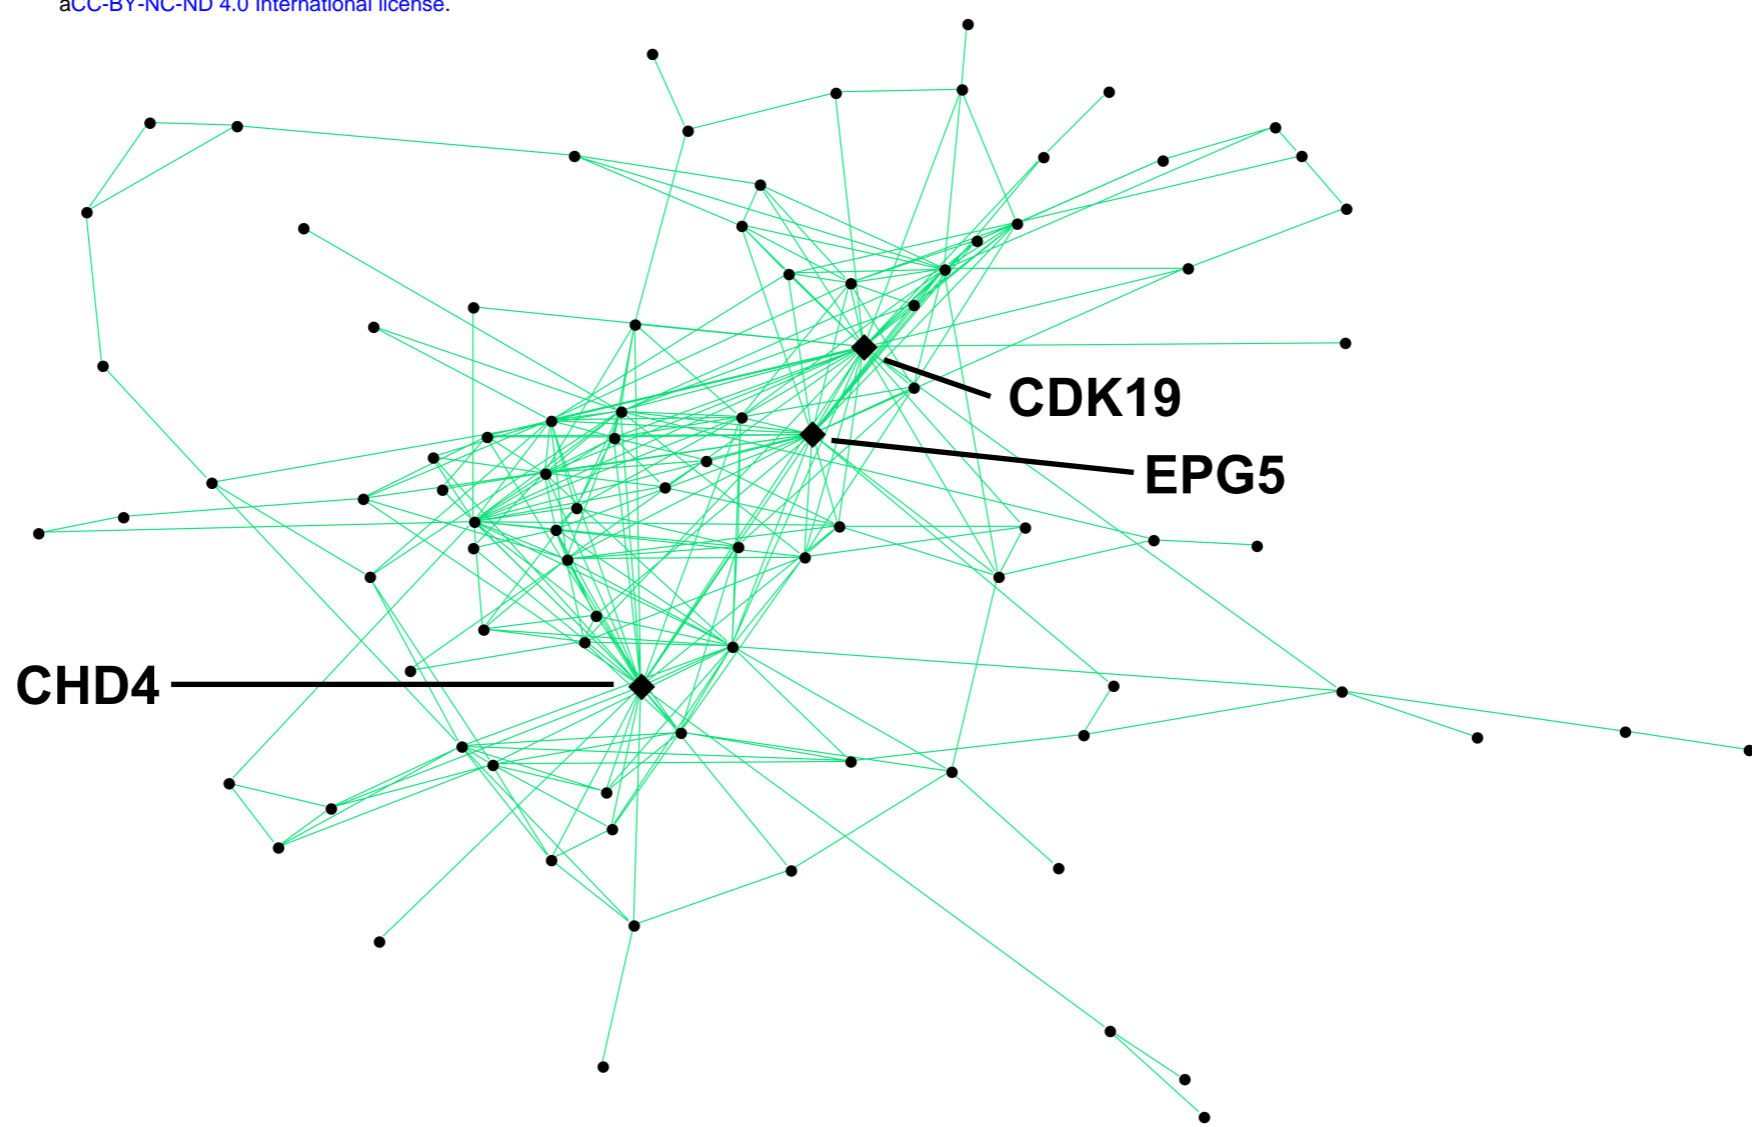**B****CDK19**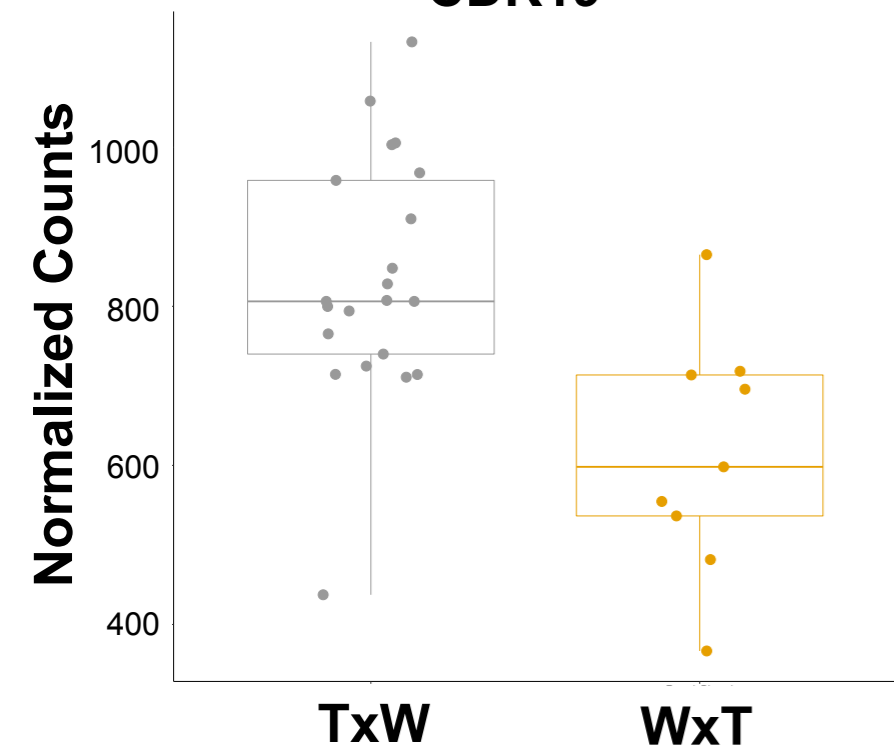**C****CHD4**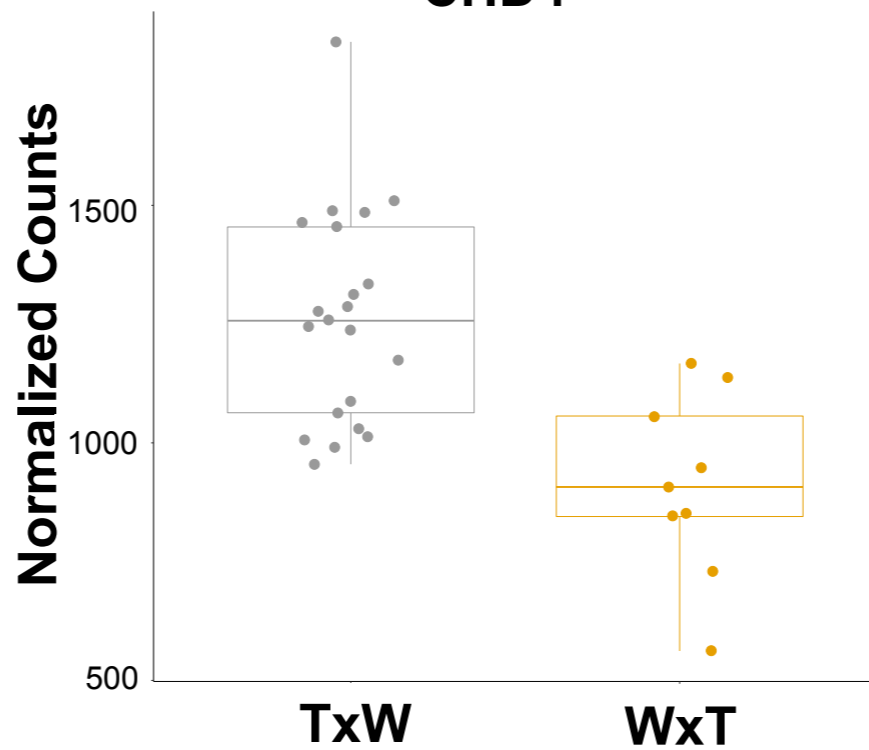**D****EPG5**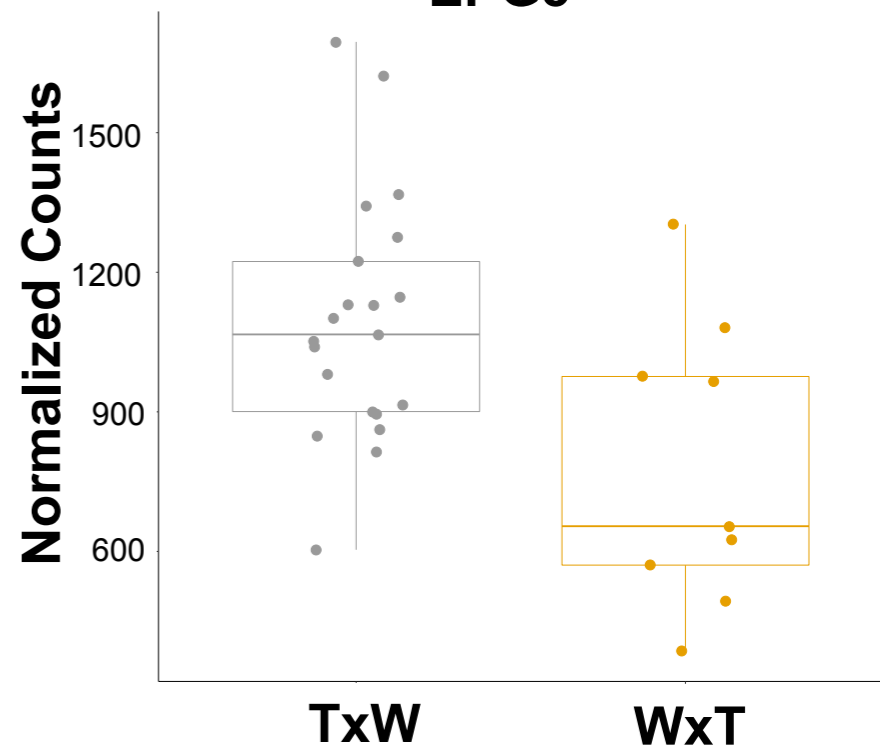

Source: https://www.biorxiv.org/content/10.1101/488684v2.full.pdf
